# Supplementary material for: Establishment of a ferroptosis-related gene signature for prognosis in lung adenocarcinoma patients
Source: PeerJ. 2021 Aug 6;9:e11931. doi: 10.7717/peerj.11931 (PMC8351575; doi:10.7717/peerj.11931)
Supplement: Supplemental Information 3 [file peerj-09-11931-s003.xls]

## Sheet: Supplementary Table1
Ferrotosis-related genes	Name
NOS2	Nitric Oxide Synthase 2
LONP1	Lon Peptidase 1, Mitochondrial
FTMT	Ferritin Mitochondrial
RGS4	Regulator Of G Protein Signaling 4
NFE2L2	Nuclear Factor, Erythroid 2 Like 2
MT1G	Metallothionein 1G
BLOC1S5-TXNDC5	BLOC1S5-TXNDC5 Readthrough (NMD Candidate)
CHMP6	Charged Multivesicular Body Protein 6
BRD4	Bromodomain Containing 4
ZNF419	Zinc Finger Protein 419
EIF2S1	Eukaryotic Translation Initiation Factor 2 Subunit Alpha
ISCU	Iron-Sulfur Cluster Assembly Enzyme
LOC284561
GPX4	Glutathione Peroxidase 4
GCH1	GTP Cyclohydrolase 1
HRAS	HRas Proto-Oncogene, GTPase
VEGFA	Vascular Endothelial Growth Factor A
ATG3	Autophagy Related 3
SNORA16A	Small Nucleolar RNA, H/ACA Box 16A
FH	Fumarate Hydratase
ALOX12	arachidonate 12-lipoxygenase
HIC1	HIC ZBTB Transcriptional Repressor 1
EGFR	Epidermal Growth Factor Receptor
NOX3	NADPH Oxidase 3
TAZ	Tafazzin
SLC3A2	Solute Carrier Family 3 Member 2
DRD4	Dopamine Receptor D4
MAFG	MAF BZIP Transcription Factor G
LURAP1L	Leucine Rich Adaptor Protein 1 Like
CDKN1A	Cyclin Dependent Kinase Inhibitor 1A
PEBP1	Phosphatidylethanolamine Binding Protein 1
LINC00472	Long Intergenic Non-Protein Coding RNA 472
SAT1	Spermidine/Spermine N1-Acetyltransferase 1
HMGB1	High Mobility Group Box 1
MYB	MYB Proto-Oncogene, Transcription Factor
BID	BH3 Interacting Domain Death Agonist
Fer1HCH
PLIN4	Perilipin 4
PHKG2	Phosphorylase Kinase Catalytic Subunit Gamma 2
MAP3K5	Mitogen-Activated Protein Kinase Kinase Kinase 5
CHMP5	Charged Multivesicular Body Protein 5
DRD5	Dopamine Receptor D5
SLC40A1	Solute Carrier Family 40 Member 1
HSD17B11	Hydroxysteroid 17-Beta Dehydrogenase 11
CS	Citrate Synthase
PRDX1	Peroxiredoxin 1
PRKAA1	Protein Kinase AMP-Activated Catalytic Subunit Alpha 1
FADS2	Fatty Acid Desaturase 2
MAPK9	Mitogen-Activated Protein Kinase 9
IREB2	Iron Responsive Element Binding Protein 2
FTL	Ferritin Light Chain
MAPK14	Mitogen-Activated Protein Kinase 14
YY1AP1	YY1 Associated Protein 1
VLDLR	Very Low Density Lipoprotein Receptor
SCD	Stearoyl-CoA Desaturase
STAT3	Signal Transducer And Activator Of Transcription 3
CAPG	Capping Actin Protein, Gelsolin Like
ATG4D	Autophagy Related 4D Cysteine Peptidase
TGFBR1	Transforming Growth Factor Beta Receptor 1
ATM	ATM Serine/Threonine Kinase
ATG13	Autophagy Related 13
DNAJB6	DnaJ Heat Shock Protein Family (Hsp40) Member B6
KEAP1	Kelch Like ECH Associated Protein 1
TXNIP	Thioredoxin Interacting Protein
TUBE1	Tubulin Epsilon 1
ALOX15	arachidonate 15-lipoxygenase
AIFM2	Apoptosis Inducing Factor Mitochondria Associated 2
SP1	Sp1 Transcription Factor
PIK3CA	Phosphatidylinositol-4,5-Bisphosphate 3-Kinase Catalytic Subunit Alpha
WIPI1	WD Repeat Domain, Phosphoinositide Interacting 1
CEBPG	CCAAT Enhancer Binding Protein Gamma
HIF1A	Hypoxia Inducible Factor 1 Subunit Alpha
RELA	RELA Proto-Oncogene, NF-KB Subunit
XBP1	X-Box Binding Protein 1
EIF2AK4	Eukaryotic Translation Initiation Factor 2 Alpha Kinase 4
LINC00336	Long Intergenic Non-Protein Coding RNA 336
ACVR1B	Activin A Receptor Type 1B
MIR17	MicroRNA 17
SLC38A1	Solute Carrier Family 38 Member 1
MIR6852	MicroRNA 6852
ULK2	Unc-51 Like Autophagy Activating Kinase 2
ATG16L1	Autophagy Related 16 Like 1
NF2	Neurofibromin 2
SESN2	Sestrin 2
PGD	Phosphogluconate Dehydrogenase
GLS2	Glutaminase 2
UBC	Ubiquitin C
KLHL24	Kelch Like Family Member 24
ATP5MC3	ATP synthase membrane subunit c locus 3
HSPB1	Heat Shock Protein Family B (Small) Member 1
GOT1	Glutamic-Oxaloacetic Transaminase 1
ACSL3	Acyl-CoA Synthetase Long Chain Family Member 3
PLIN2	Perilipin 2
SCP2	Sterol Carrier Protein 2
PCK2	Phosphoenolpyruvate Carboxykinase 2, Mitochondrial
MIR9-1	MicroRNA 9-1
MT3	Metallothionein 3
ACSF2	Acyl-CoA Synthetase Family Member 2
FTH1	Ferritin Heavy Chain 1
ATG7	Autophagy Related 7
WIPI2	WD Repeat Domain, Phosphoinositide Interacting 2
PTGS2	Prostaglandin-Endoperoxide Synthase 2
SELENOS	Selenoprotein S
NNMT	Nicotinamide N-Methyltransferase
HMOX1	Heme Oxygenase 1
EMC2	ER Membrane Protein Complex Subunit 2
MAPK1	Mitogen-Activated Protein Kinase 1
SLC2A6	Solute Carrier Family 2 Member 6
MAPK8	Mitogen-Activated Protein Kinase 8
MTDH	Metadherin
SOCS1	Suppressor Of Cytokine Signaling 1
EGLN2	Egl-9 Family Hypoxia Inducible Factor 2
RB1	RB Transcriptional Corepressor 1
FBXW7	F-Box And WD Repeat Domain Containing 7
SRC	SRC Proto-Oncogene, Non-Receptor Tyrosine Kinase
SETD1B	SET Domain Containing 1B, Histone Lysine Methyltransferase
NFS1	NFS1 Cysteine Desulfurase
MIR9-2	MicroRNA 9-2
TP53	Tumor Protein P53
MAP1LC3A	Microtubule Associated Protein 1 Light Chain 3 Alpha
ATP6V1G2	ATPase H+ Transporting V1 Subunit G2
OTUB1	OTU Deubiquitinase, Ubiquitin Aldehyde Binding 1
KIM-1	Hepatitis A Virus Cellular Receptor 1
CARS1	Cysteinyl-TRNA Synthetase 1
LAMP2	Lysosomal Associated Membrane Protein 2
ELAVL1	ELAV Like RNA Binding Protein 1
IDH1	Isocitrate Dehydrogenase (NADP(+)) 1
RPL8	Ribosomal Protein L8
SIRT1	Sirtuin 1
ABCC1	ATP Binding Cassette Subfamily C Member 1
LPIN1	Lipin 1
ACSL4	acyl-CoA synthetase long-chain family member 4
PANX1	Pannexin 1
LOC390705	Protein Phosphatase 2 Regulatory Subunit B'', Beta Pseudogene
MIR9-3	MicroRNA 9-3
PRDX6	Peroxiredoxin 6
SQSTM1	Sequestosome 1
YWHAE	Tyrosine 3-Monooxygenase/Tryptophan 5-Monooxygenase Activation Protein Epsilon
STEAP3	STEAP3 Metalloreductase
MUC1	Mucin 1, Cell Surface Associated
ULK1	Unc-51 Like Autophagy Activating Kinase 1
AGPAT3	1-Acylglycerol-3-Phosphate O-Acyltransferase 3
DUOX2	Dual Oxidase 2
TSC22D3	TSC22 Domain Family Member 3
KRAS	KRAS Proto-Oncogene, GTPase
MIR137	MicroRNA 137
SLC1A5	Solute Carrier Family 1 Member 5
NRAS	NRAS Proto-Oncogene, GTPase
MTOR	Mechanistic Target Of Rapamycin Kinase
SLC2A8	Solute Carrier Family 2 Member 8
SNX4	Sorting Nexin 4
ATG5	Autophagy Related 5
GLUT13	Glucose Transporter Type 1, Erythrocyte/Brain
ACO1	Aconitase 1
GABARAPL1	GABA Type A Receptor Associated Protein Like 1
CISD2	CDGSH Iron Sulfur Domain 2
GABPB1	GA Binding Protein Transcription Factor Subunit Beta 1
ATF4	Activating Transcription Factor 4
ARNTL	Aryl Hydrocarbon Receptor Nuclear Translocator Like
CHAC1	ChaC Glutathione Specific Gamma-Glutamylcyclotransferase 1
G6PDX	Glucose-6-Phosphate Dehydrogenase
TMBIM4	Transmembrane BAX Inhibitor Motif Containing 4
PML	PML Nuclear Body Scaffold
MIR30B	MicroRNA 30B
HERPUD1	Homocysteine Inducible ER Protein With Ubiquitin Like Domain 1
SLC2A12	Solute Carrier Family 2 Member 12
FLT3	Fms Related Receptor Tyrosine Kinase 3
ARRDC3	Arrestin Domain Containing 3
DDIT3	DNA Damage Inducible Transcript 3
HSPA5	Heat Shock Protein Family A (Hsp70) Member 5
RIPK1	Receptor Interacting Serine/Threonine Kinase 1
MAPK3	Mitogen-Activated Protein Kinase 3
HSF1	Heat Shock Transcription Factor 1
BAP1	BRCA1 Associated Protein 1
BACH1	BTB Domain And CNC Homolog 1
OXSR1	Oxidative Stress Responsive Kinase 1
CISD1	CDGSH Iron Sulfur Domain 1
BECN1	Beclin 1
MIR4715	MicroRNA 4715
GABARAPL2	GABA Type A Receptor Associated Protein Like 2
NCOA4	Nuclear Receptor Coactivator 4
ANO6	Anoctamin 6
VDAC2	Voltage Dependent Anion Channel 2
MIR212	MicroRNA 212
CD44	CD44 Molecule (Indian Blood Group)
TRIB3	Tribbles Pseudokinase 3
ZEB1	Zinc Finger E-Box Binding Homeobox 1
TF	Transferrin
TFR2	Transferrin Receptor 2
CA9	Carbonic Anhydrase 9
CBS	Cystathionine Beta-Synthase
GPX2	Glutathione Peroxidase 2
TNFAIP3	TNF Alpha Induced Protein 3
GCLC	Glutamate-Cysteine Ligase Catalytic Subunit
STMN1	Stathmin 1
CXCL2	C-X-C Motif Chemokine Ligand 2
G6PD	Glucose-6-Phosphate Dehydrogenase
TXNRD1	Thioredoxin Reductase 1
HILPDA	Hypoxia Inducible Lipid Droplet Associated
ALB	Albumin
FANCD2	FA Complementation Group D2
NCF2	Neutrophil Cytosolic Factor 2
ALOX15	Arachidonate 15-Lipoxygenase
NGB	Neuroglobin
DUSP1	Dual Specificity Phosphatase 1
IL6	Interleukin 6
PRKAA2	Protein Kinase AMP-Activated Catalytic Subunit Alpha 2
DDIT4	DNA Damage Inducible Transcript 4
CDO1	Cysteine Dioxygenase Type 1
NQO1	NAD(P)H Quinone Dehydrogenase 1
PSAT1	Phosphoserine Aminotransferase 1
IFNG	Interferon Gamma
TFAP2C	Transcription Factor AP-2 Gamma
CAV1	Caveolin 1
HELLS	Helicase, Lymphoid Specific
ASNS	Asparagine Synthetase (Glutamine-Hydrolyzing)
HNF4A	Hepatocyte Nuclear Factor 4 Alpha
ALOX12B	Arachidonate 12-Lipoxygenase, 12R Type
TLR4	Toll Like Receptor 4
NOX1	NADPH Oxidase 1
IL33	Interleukin 33
AKR1C3	aldo-keto reductase family 1 member C3
CDKN2A	Cyclin Dependent Kinase Inhibitor 2A
JUN	Jun Proto-Oncogene
GDF15	Growth Differentiation Factor 15
MIOX	Myo-Inositol Oxygenase
AURKA	Aurora Kinase A
ZFP36	ZFP36 Ring Finger Protein
ENPP2	Ectonucleotide Pyrophosphatase/Phosphodiesterase 2
SLC7A11	Solute Carrier Family 7 Member 11
SLC2A1	Solute Carrier Family 2 Member 1
ALOXE3	Arachidonate Lipoxygenase 3
SLC2A14	Solute Carrier Family 2 Member 14
NOX5	NADPH Oxidase 5
CYBB	Cytochrome B-245 Beta Chain
AKR1C1	aldo-keto reductase family 1 member C1
HAMP	Hepcidin Antimicrobial Peptide
EPAS1	Endothelial PAS Domain Protein 1
JDP2	Jun Dimerization Protein 2
PROM2	Prominin 2
ALOX5	arachidonate 5-lipoxygenase
ATF3	Activating Transcription Factor 3
DPP4	Dipeptidyl Peptidase 4
SLC2A3	Solute Carrier Family 2 Member 3
ANGPTL7	Angiopoietin Like 7
ZFP69B	ZFP69 Zinc Finger Protein B
AKR1C2	aldo-keto reductase family 1 member C2
BNIP3	BCL2 Interacting Protein 3
NOX4	NADPH Oxidase 4
TFRC	Transferrin Receptor
DUOX1	Dual Oxidase 1
SRXN1	Sulfiredoxin 1
SLC7A5	Solute Carrier Family 7 Member 5
SLC1A4	Solute Carrier Family 1 Member 4
LPCAT3	Lysophosphatidylcholine Acyltransferase 3
GPT2	Glutamic--Pyruvic Transaminase 2
TP63	Tumor Protein P63
HBA1	Hemoglobin Subunit Alpha 1
