# Supplementary material for: Establishment of a ferroptosis-related gene signature for prognosis in lung adenocarcinoma patients
Source: PeerJ. 2021 Aug 6;9:e11931. doi: 10.7717/peerj.11931 (PMC8351575; doi:10.7717/peerj.11931)
Supplement: Supplemental Information 5 [file peerj-09-11931-s005.xls]

## Sheet: res-NSCLC
row	baseMean	log2FoldChange	lfcSE	stat	pvalue	padj
KLHL17	437.141	1.4501	0.121192	11.9652	5.4e-33	6.75e-32
PLEKHN1	333.653	3.14183	0.148843	21.1083	6.68e-99	1.74e-96
PERM1	141.88	3.05586	0.16008	19.0895	3.09e-81	3.19e-79
ISG15	4263.51	1.54994	0.185929	8.33623	7.67e-17	3.75e-16
TTLL10	88.6367	-1.65765	0.261645	-6.3355	2.37e-10	7.33e-10
TNFRSF18	368.327	2.65683	0.187169	14.1948	9.87e-46	2.35e-44
C1QTNF12	65.6288	1.93587	0.22274	8.69116	3.59e-18	1.91e-17
SCNN1D	192.847	1.5318	0.177497	8.63003	6.13e-18	3.22e-17
PUSL1	683.304	1.19664	0.103108	11.6056	3.86e-31	4.36e-30
TAS1R3	220.147	2.25091	0.195466	11.5156	1.1e-30	1.22e-29
CCNL2	5772.88	1.03854	0.122548	8.47456	2.36e-17	1.19e-16
TMEM88B	9.56938	2.9719	0.311056	9.55422	1.25e-21	8.23e-21
ATAD3B	1260.1	1.48766	0.120976	12.2971	9.38e-35	1.29e-33
ATAD3A	1203.62	1.20692	0.0983239	12.2749	1.24e-34	1.68e-33
CALML6	18.0961	2.41377	0.253597	9.51813	1.76e-21	1.15e-20
TMEM52	117.04	2.0086	0.176211	11.3988	4.24e-30	4.55e-29
CFAP74	160.308	-1.45125	0.270579	-5.36352	8.16e-08	2.06e-07
GABRD	85.663	1.03986	0.166475	6.24637	4.2e-10	1.28e-09
PLCH2	323.772	1.26613	0.210676	6.00984	1.86e-09	5.36e-09
ARHGEF16	1756.44	1.77098	0.108629	16.303	9.4e-60	4.1e-58
CCDC27	4.44583	1.62575	0.281318	5.77905	7.51e-09	2.06e-08
AJAP1	44.618	-1.80088	0.230333	-7.81861	5.34e-15	2.32e-14
KCNAB2	1880.48	-1.07826	0.110987	-9.71516	2.6e-22	1.79e-21
RNF207	603.833	1.57318	0.144212	10.9088	1.05e-27	9.84e-27
ESPN	689.747	2.37668	0.208318	11.4089	3.77e-30	4.06e-29
TNFRSF25	667.179	1.95427	0.154588	12.6418	1.24e-36	1.88e-35
TAS1R1	39.5316	1.02425	0.267179	3.83358	0.000126294	0.00023856
UTS2	20.4691	1.14404	0.265829	4.30368	1.68e-05	3.46e-05
TNFRSF9	335.294	1.33622	0.17747	7.52928	5.1e-14	2.06e-13
ENO1	84416.6	1.1902	0.0945555	12.5873	2.48e-36	3.69e-35
CA6	9.99162	2.80707	0.393456	7.13439	9.72e-13	3.61e-12
SLC2A5	418.01	2.39814	0.180254	13.3042	2.19e-40	3.96e-39
CASZ1	940.456	-1.02932	0.115784	-8.88998	6.11e-19	3.41e-18
SRM	2903.79	1.03569	0.0936749	11.0562	2.05e-28	2e-27
ANGPTL7	29.1431	-3.44412	0.305178	-11.2856	1.55e-29	1.61e-28
DISP3	39.2643	2.24638	0.270004	8.3198	8.81e-17	4.29e-16
FBXO2	984.805	1.15325	0.197685	5.83379	5.42e-09	1.5e-08
NPPB	1.81718	1.91232	0.583897	3.2751	0.00105623	0.00181113
C1orf158	64.8722	-2.25408	0.364338	-6.18678	6.14e-10	1.84e-09
PDPN	1569.71	-1.358	0.153076	-8.8714	7.22e-19	4.01e-18
KAZN	519.836	-1.3152	0.140799	-9.341	9.54e-21	5.97e-20
FHAD1	325.055	-1.08211	0.184175	-5.87545	4.22e-09	1.18e-08
CELA2B	9.73194	-2.14252	0.168069	-12.7478	3.2e-37	4.95e-36
AGMAT	158.383	2.61277	0.154515	16.9095	3.83e-64	2.03e-62
TMEM82	19.2347	4.95415	0.420184	11.7904	4.37e-32	5.22e-31
C1orf64	8.5975	1.51079	0.429781	3.51525	0.000439344	0.000784081
HSPB7	262.642	-1.44856	0.157669	-9.18734	4.03e-20	2.41e-19
CLCNKA	43.7975	1.18958	0.246144	4.83286	1.35e-06	3.05e-06
FAM131C	14.9697	3.52133	0.321351	10.9579	6.09e-28	5.83e-27
ARHGEF19	1713.66	1.56839	0.126166	12.4311	1.77e-35	2.51e-34
SPATA21	4.34863	1.03048	0.335711	3.06954	0.00214386	0.00354337
MFAP2	1320.36	1.55064	0.159342	9.73152	2.21e-22	1.53e-21
PADI1	130.889	5.57531	0.386492	14.4254	3.58e-47	9.08e-46
PADI3	81.578	5.49219	0.501529	10.9509	6.58e-28	6.28e-27
PADI4	20.1402	-2.53709	0.213373	-11.8904	1.33e-32	1.62e-31
ACTL8	15.2311	5.8259	0.590637	9.86376	5.98e-23	4.31e-22
PAX7	428.303	7.98759	0.581636	13.733	6.44e-43	1.33e-41
AKR7A3	459.335	5.02808	0.294127	17.0949	1.62e-65	8.97e-64
HTR6	3.0324	1.09479	0.264796	4.13448	3.56e-05	7.11e-05
RNF186	42.0377	5.16098	0.385543	13.3863	7.27e-41	1.35e-39
PLA2G2A	302.329	-1.26497	0.287604	-4.39831	1.09e-05	2.29e-05
PLA2G5	109.699	-1.25575	0.131541	-9.54644	1.34e-21	8.84e-21
PLA2G2D	465.246	1.13514	0.245292	4.62771	3.7e-06	8.07e-06
PLA2G2F	16.2473	5.47367	0.435862	12.5582	3.58e-36	5.27e-35
PLA2G2C	19.5272	3.17912	0.260845	12.1878	3.61e-34	4.79e-33
CAMK2N1	2063.64	-1.01885	0.181488	-5.61389	1.98e-08	5.25e-08
CDA	760.394	2.44018	0.258909	9.42485	4.31e-21	2.75e-20
KIF17	122.412	-2.00049	0.128271	-15.5958	7.78e-55	2.81e-53
SH2D5	26.0485	2.33073	0.303605	7.67684	1.63e-14	6.81e-14
ALPL	6309.86	-1.25385	0.233754	-5.36397	8.14e-08	2.06e-07
EPHA8	6.28969	3.52379	0.416372	8.46308	2.6e-17	1.31e-16
C1QA	11169.7	-1.57133	0.152457	-10.3067	6.57e-25	5.3e-24
C1QC	10573.1	-1.10715	0.153344	-7.22007	5.2e-13	1.96e-12
C1QB	13611.6	-1.59579	0.158734	-10.0532	8.89e-24	6.73e-23
EPHB2	1749.87	2.23388	0.169073	13.2125	7.43e-40	1.31e-38
HTR1D	143.587	2.69384	0.266006	10.127	4.19e-24	3.24e-23
E2F2	314.529	2.34966	0.146423	16.047	5.99e-58	2.44e-56
ID3	2302.73	-1.13772	0.127338	-8.93461	4.09e-19	2.31e-18
GALE	3668.67	1.07707	0.110622	9.73645	2.11e-22	1.46e-21
CNR2	50.5339	1.11065	0.227556	4.88076	1.06e-06	2.42e-06
MYOM3	52.0735	1.33283	0.255221	5.22226	1.77e-07	4.32e-07
IL22RA1	175.944	1.29752	0.237473	5.46387	4.66e-08	1.2e-07
GRHL3	160.186	3.52664	0.196815	17.9186	8.44e-72	6.09e-70
RHCE	73.1976	1.98116	0.191145	10.3647	3.59e-25	2.94e-24
AUNIP	122.541	2.34412	0.15979	14.67	1e-48	2.73e-47
STMN1	6946.47	1.03684	0.138234	7.5006	6.35e-14	2.55e-13
SLC30A2	35.5897	2.40819	0.287015	8.39046	4.84e-17	2.39e-16
FAM110D	84.8299	-2.31407	0.135895	-17.0283	5.06e-65	2.77e-63
CATSPER4	1.74173	1.4162	0.345559	4.09829	4.16e-05	8.26e-05
CEP85	1011.53	1.06059	0.0864111	12.2737	1.25e-34	1.7e-33
CD52	2704.83	-2.34374	0.159545	-14.6901	7.46e-49	2.05e-47
LIN28A	8.62575	4.12432	0.556424	7.41219	1.24e-13	4.9e-13
FAM46B	436.811	-2.80725	0.166203	-16.8905	5.29e-64	2.76e-62
FCN3	1520.44	-4.49187	0.221012	-20.3241	7.88e-92	1.52e-89
FGR	1362.35	-2.09823	0.135963	-15.4324	9.91e-54	3.43e-52
STX12	3323.66	-1.03939	0.0567653	-18.3104	6.84e-75	5.39e-73
THEMIS2	2491.82	-1.10017	0.106225	-10.3569	3.89e-25	3.19e-24
SMPDL3B	3025.95	1.86671	0.157065	11.8849	1.42e-32	1.73e-31
PTAFR	1887.59	-1.01129	0.14196	-7.1238	1.05e-12	3.89e-12
RCC1	2915.72	1.73726	0.0922675	18.8285	4.41e-79	4.15e-77
OPRD1	93.9961	2.30493	0.259322	8.88828	6.21e-19	3.46e-18
LAPTM5	16241.8	-1.16321	0.12265	-9.48392	2.45e-21	1.59e-20
NKAIN1	37.4001	4.40454	0.324325	13.5806	5.22e-42	1.03e-40
SERINC2	8774.77	2.05248	0.128277	16.0004	1.27e-57	5.1e-56
ADGRB2	318.617	1.53181	0.172194	8.89583	5.8e-19	3.24e-18
DCDC2B	56.2325	-1.63892	0.248284	-6.60099	4.08e-11	1.34e-10
FAM167B	232.13	-1.41816	0.112327	-12.6252	1.53e-36	2.29e-35
MARCKSL1	9087.08	1.91996	0.11719	16.3834	2.51e-60	1.13e-58
ZBTB8B	24.7546	2.71919	0.299474	9.07988	1.09e-19	6.35e-19
SYNC	132.532	-1.8417	0.125409	-14.6855	7.98e-49	2.19e-47
HPCA	24.7286	2.4011	0.192126	12.4975	7.7e-36	1.11e-34
AZIN2	397.911	1.29819	0.12249	10.5983	3.03e-26	2.63e-25
CSMD2	145.772	1.76054	0.188231	9.35307	8.51e-21	5.34e-20
HMGB4	1.19497	2.4694	0.957569	2.57882	0.00991376	0.0150989
GJB5	119.082	2.36335	0.320816	7.36668	1.75e-13	6.84e-13
GJB4	47.2152	2.66335	0.355926	7.48288	7.27e-14	2.92e-13
GJB3	556.614	3.25159	0.28472	11.4203	3.31e-30	3.57e-29
GJA4	477.13	-1.43968	0.122953	-11.7092	1.14e-31	1.33e-30
DLGAP3	42.5159	1.15718	0.204203	5.6668	1.45e-08	3.89e-08
CLSPN	332.315	2.71227	0.164677	16.4703	6e-61	2.76e-59
TEKT2	220.287	-1.61743	0.25802	-6.26861	3.64e-10	1.11e-09
SH3D21	463.489	1.1243	0.120954	9.29531	1.47e-20	9.04e-20
CSF3R	3271.75	-1.08258	0.193642	-5.59065	2.26e-08	5.97e-08
RSPO1	61.1373	-3.57985	0.204955	-17.4666	2.58e-68	1.63e-66
CDCA8	859.627	3.05264	0.147659	20.6736	5.99e-95	1.32e-92
EPHA10	527.877	3.63054	0.181713	19.9796	8.29e-89	1.33e-86
MANEAL	859.045	1.83383	0.148657	12.336	5.8e-35	8.01e-34
AL139260.3	11.8475	1.67807	0.190797	8.79506	1.43e-18	7.83e-18
RHBDL2	466.448	2.67037	0.145086	18.4054	1.19e-75	9.77e-74
BMP8A	62.792	2.33317	0.175242	13.314	1.92e-40	3.49e-39
HEYL	1055.71	-1.00167	0.110236	-9.08657	1.02e-19	5.98e-19
NT5C1A	11.759	2.31524	0.360653	6.41958	1.37e-10	4.31e-10
BMP8B	390.596	1.2308	0.124562	9.88104	5.03e-23	3.64e-22
OXCT2	17.92	1.52913	0.207996	7.35174	1.96e-13	7.63e-13
MFSD2A	2621.84	-1.59203	0.166607	-9.55562	1.23e-21	8.12e-21
TMCO2	1.56089	-2.70996	0.210258	-12.8888	5.21e-38	8.35e-37
COL9A2	1337.79	1.97065	0.200967	9.80587	1.06e-22	7.53e-22
ZFP69B	110.133	1.69485	0.114859	14.756	2.82e-49	7.91e-48
FOXO6	215.501	2.28542	0.198699	11.5019	1.29e-30	1.42e-29
EDN2	309.943	1.85316	0.263068	7.04439	1.86e-12	6.77e-12
GUCA2A	13.4225	-1.38549	0.397305	-3.48722	0.000488065	0.000866603
CLDN19	3.19324	-1.06997	0.374094	-2.86016	0.00423426	0.00675567
TMEM269	5.08139	1.02094	0.219474	4.65177	3.29e-06	7.21e-06
SLC2A1	7816.31	3.50196	0.185583	18.87	2.01e-79	1.92e-77
FAM183A	192.107	-1.91802	0.26059	-7.36031	1.83e-13	7.17e-13
CFAP57	261.596	-1.37488	0.228606	-6.01419	1.81e-09	5.23e-09
TIE1	1565.19	-1.96445	0.119621	-16.4223	1.33e-60	6.04e-59
CDC20	1536.85	3.78104	0.172922	21.8656	5.53e-106	2.57e-103
ARTN	109.398	2.635	0.215122	12.2488	1.7e-34	2.3e-33
B4GALT2	2818.91	1.21746	0.0867258	14.038	9.13e-45	2.08e-43
KLF17	8.3423	-1.94501	0.179736	-10.8215	2.72e-27	2.5e-26
KIF2C	1026.7	3.57441	0.166013	21.5309	8e-103	2.79e-100
BEST4	61.9235	1.28035	0.174901	7.32043	2.47e-13	9.57e-13
TCTEX1D4	28.1971	-1.69528	0.221422	-7.6563	1.91e-14	7.96e-14
HPDL	91.4356	3.51526	0.234437	14.9945	7.98e-51	2.44e-49
MMACHC	470.197	1.03815	0.07371	14.0843	4.74e-45	1.1e-43
CCDC17	333.046	-1.29026	0.246979	-5.22415	1.75e-07	4.28e-07
RAD54L	275.757	3.28593	0.16074	20.4425	7e-93	1.41e-90
DMBX1	73.256	6.49227	0.374652	17.3288	2.85e-67	1.72e-65
KNCN	1.54132	-1.49641	0.412323	-3.62923	0.000284273	0.00051768
CYP4B1	7204.27	-2.52159	0.276784	-9.11033	8.21e-20	4.83e-19
PDZK1IP1	3653.17	1.04196	0.199342	5.22698	1.72e-07	4.22e-07
TAL1	194.022	-2.77524	0.138107	-20.0948	8.2e-90	1.42e-87
STIL	579.482	2.55765	0.126754	20.1781	1.52e-90	2.71e-88
FOXE3	5.27107	3.12413	0.396076	7.8877	3.08e-15	1.36e-14
FOXD2	113.273	1.27399	0.12107	10.5228	6.78e-26	5.76e-25
SLC5A9	160.135	-2.50377	0.229199	-10.924	8.85e-28	8.35e-27
ELAVL4	36.1412	1.75427	0.227682	7.70488	1.31e-14	5.5e-14
DMRTA2	104.107	5.07616	0.377527	13.4458	3.26e-41	6.15e-40
RAB3B	391.45	4.2347	0.302717	13.989	1.82e-44	4.07e-43
ZFYVE9	1067.54	-1.3127	0.0988601	-13.2784	3.09e-40	5.53e-39
ORC1	323.953	2.7451	0.155387	17.6662	7.64e-70	5.19e-68
ZYG11A	153.253	5.38453	0.261803	20.5671	5.41e-94	1.14e-91
SLC1A7	1436.06	3.02525	0.328638	9.20541	3.4e-20	2.05e-19
LRP8	890.99	1.27733	0.14429	8.85251	8.56e-19	4.73e-18
NDC1	1638.51	1.01603	0.093689	10.8447	2.11e-27	1.95e-26
DIO1	88.5301	1.33218	0.291381	4.57196	4.83e-06	1.04e-05
LDLRAD1	394.844	-1.50109	0.280289	-5.35552	8.53e-08	2.15e-07
ACOT11	399.511	1.25158	0.118884	10.5277	6.44e-26	5.47e-25
DHCR24	32810.3	-1.01526	0.107168	-9.47354	2.71e-21	1.75e-20
TMEM61	130.005	1.33293	0.195607	6.81433	9.47e-12	3.27e-11
PCSK9	802.249	-1.48396	0.273241	-5.43094	5.61e-08	1.44e-07
PLPP3	3526.87	-1.39959	0.0852561	-16.4164	1.46e-60	6.61e-59
PRKAA2	634.419	1.21907	0.181144	6.72984	1.7e-11	5.74e-11
C8A	22.3933	1.30566	0.380816	3.42858	0.000606758	0.00106668
C8B	189.562	-2.64534	0.342021	-7.73443	1.04e-14	4.41e-14
JUN	11160.7	-1.08894	0.120337	-9.04906	1.44e-19	8.36e-19
HOOK1	1879.24	1.08179	0.101206	10.689	1.15e-26	1.02e-25
C1orf87	115.174	-2.38584	0.351731	-6.78313	1.18e-11	4.04e-11
L1TD1	37.9944	-1.86332	0.196653	-9.47512	2.66e-21	1.73e-20
KANK4	182.73	-1.3196	0.235381	-5.60623	2.07e-08	5.47e-08
ANGPTL3	15.9492	3.84467	0.380023	10.1169	4.65e-24	3.59e-23
FOXD3	13.8993	4.12738	0.404381	10.2067	1.85e-24	1.46e-23
ROR1	564.387	-1.82042	0.152366	-11.9476	6.68e-33	8.31e-32
UBE2U	7.27262	1.99886	0.483987	4.12999	3.63e-05	7.25e-05
AK4	1198.9	2.58431	0.186946	13.8238	1.83e-43	3.89e-42
LEPR	1265.64	-1.84234	0.172951	-10.6524	1.7e-26	1.5e-25
TCTEX1D1	83.3128	-1.63864	0.209141	-7.83507	4.69e-15	2.04e-14
WDR78	326.592	-1.3193	0.183533	-7.18833	6.56e-13	2.46e-12
C1orf141	23.5092	-2.01952	0.436655	-4.62498	3.75e-06	8.17e-06
IL12RB2	61.3437	1.47444	0.210638	6.99986	2.56e-12	9.2e-12
RPE65	2.80907	1.43081	0.413107	3.46354	0.000533109	0.000942219
DEPDC1	488.783	3.83591	0.182017	21.0744	1.37e-98	3.51e-96
CTH	342.231	1.14537	0.138456	8.27244	1.31e-16	6.33e-16
NEGR1	302.326	-1.65527	0.183034	-9.04352	1.52e-19	8.78e-19
ERICH3	312.599	-2.0481	0.346002	-5.91933	3.23e-09	9.14e-09
LHX8	7.01885	4.35392	0.606405	7.17989	6.98e-13	2.62e-12
SLC44A5	605.801	2.50394	0.258242	9.6961	3.13e-22	2.15e-21
ST6GALNAC3	173.081	-1.95056	0.149215	-13.0722	4.75e-39	8.04e-38
ST6GALNAC5	475.508	-2.2211	0.16585	-13.3922	6.72e-41	1.25e-39
NEXN	671.79	-1.53646	0.126156	-12.1791	4.02e-34	5.31e-33
DNAJB4	983.67	-1.17364	0.126441	-9.28212	1.66e-20	1.02e-19
GIPC2	184.362	-1.72401	0.203187	-8.48481	2.16e-17	1.09e-16
PTGFR	191.014	-1.25042	0.253537	-4.9319	8.14e-07	1.88e-06
ADGRL4	901.163	-1.2872	0.108242	-11.8918	1.3e-32	1.6e-31
ADGRL2	2302.85	-1.89874	0.139133	-13.6469	2.11e-42	4.23e-41
TTLL7	373.434	-1.49296	0.191144	-7.81067	5.69e-15	2.46e-14
DNASE2B	48.331	-2.88793	0.236874	-12.1918	3.44e-34	4.57e-33
WDR63	105.752	-1.66762	0.23626	-7.05842	1.68e-12	6.14e-12
CYR61	10355.3	-1.624	0.14957	-10.8578	1.83e-27	1.7e-26
COL24A1	173.378	1.95988	0.151849	12.9068	4.12e-38	6.64e-37
CLCA1	5.70248	1.76597	0.592027	2.98293	0.00285505	0.00465352
GBP7	5.74999	-1.39517	0.22686	-6.1499	7.75e-10	2.31e-09
GBP4	3351.54	-1.32993	0.153294	-8.67567	4.11e-18	2.18e-17
LRRC8C	1055.07	-1.11449	0.10645	-10.4696	1.19e-25	9.99e-25
BARHL2	1.37847	2.5082	0.709465	3.53533	0.000407264	0.000729359
CDC7	478.573	1.27104	0.125951	10.0915	6.02e-24	4.61e-23
TGFBR3	1150.78	-2.5569	0.160998	-15.8816	8.5e-57	3.28e-55
BRDT	297.275	6.1418	0.436395	14.0739	5.49e-45	1.27e-43
EPHX4	169.023	2.61641	0.194674	13.4399	3.53e-41	6.64e-40
GCLM	2547.39	1.0544	0.154303	6.83327	8.3e-12	2.88e-11
ABCA4	990.035	3.71138	0.285839	12.9841	1.51e-38	2.48e-37
ARHGAP29	2895.93	-1.15323	0.12523	-9.20888	3.3e-20	1.99e-19
PLPPR5	5.46851	-2.43297	0.302505	-8.04274	8.78e-16	4.02e-15
PALMD	743.655	-2.03766	0.137249	-14.8464	7.34e-50	2.13e-48
SASS6	347.869	1.21928	0.103502	11.7803	4.93e-32	5.87e-31
CDC14A	417.67	-1.05013	0.110525	-9.50126	2.07e-21	1.35e-20
GPR88	27.8187	1.64819	0.215684	7.64169	2.14e-14	8.88e-14
S1PR1	1756.92	-2.84334	0.12123	-23.4542	1.2e-121	1.67e-118
COL11A1	3042.7	6.20205	0.295077	21.0184	4.45e-98	1.09e-95
NTNG1	152.458	-1.87486	0.279012	-6.71962	1.82e-11	6.15e-11
NBPF4	2.85076	2.53418	0.560999	4.51725	6.26e-06	1.34e-05
NBPF6	1.81271	2.54309	0.643568	3.95155	7.76e-05	0.000150094
C1orf194	174.286	-2.18969	0.290909	-7.52707	5.19e-14	2.1e-13
KIAA1324	5188.09	1.17185	0.249452	4.69771	2.63e-06	5.81e-06
PSRC1	348.823	1.23381	0.126181	9.77809	1.4e-22	9.81e-22
SYPL2	59.0931	-1.02709	0.192359	-5.33944	9.32e-08	2.34e-07
AMIGO1	569.743	-1.072	0.115802	-9.25715	2.1e-20	1.28e-19
GSTM5	203.426	-2.43702	0.149	-16.3558	3.95e-60	1.75e-58
EPS8L3	185.715	6.42412	0.484844	13.2499	4.52e-40	8.03e-39
ALX3	9.20572	4.84726	0.585535	8.27835	1.25e-16	6.03e-16
SLC6A17	47.6249	2.8753	0.286998	10.0186	1.26e-23	9.48e-23
KCNA10	2.21831	-2.35711	0.306711	-7.6851	1.53e-14	6.39e-14
CD53	3609.88	-1.03244	0.1252	-8.24634	1.63e-16	7.81e-16
CHI3L2	1087.83	-1.72907	0.217992	-7.93178	2.16e-15	9.65e-15
PIFO	895.799	-1.08833	0.203769	-5.34099	9.24e-08	2.32e-07
OVGP1	214.41	1.55164	0.160405	9.67328	3.92e-22	2.67e-21
C1orf162	1187.66	-1.80558	0.124639	-14.4865	1.47e-47	3.83e-46
FAM212B	376.215	-1.58123	0.105574	-14.9774	1.03e-50	3.14e-49
WNT2B	229.739	-1.14765	0.142773	-8.03834	9.11e-16	4.16e-15
AL603832.3	1.61032	1.61054	0.300046	5.36766	7.98e-08	2.02e-07
PPM1J	78.1716	1.34945	0.15048	8.96762	3.03e-19	1.73e-18
FAM19A3	5.15963	1.68031	0.299273	5.61464	1.97e-08	5.22e-08
SLC16A1	1225.14	1.02578	0.203321	5.04515	4.53e-07	1.07e-06
BCL2L15	632.789	3.51471	0.199395	17.6269	1.53e-69	1.03e-67
SYT6	10.8486	2.219	0.282975	7.84168	4.45e-15	1.94e-14
DENND2C	172.266	-1.12138	0.126606	-8.85722	8.2e-19	4.54e-18
TSHB	0.753342	-1.72374	0.292726	-5.88858	3.9e-09	1.1e-08
CASQ2	71.255	-2.72206	0.217529	-12.5135	6.3e-36	9.13e-35
MAB21L3	34.9662	1.56506	0.237171	6.59888	4.14e-11	1.36e-10
PTGFRN	4184.45	1.15607	0.102281	11.3029	1.27e-29	1.32e-28
CD101	294.069	-2.78614	0.133783	-20.8259	2.52e-96	5.74e-94
TRIM45	280.36	1.32116	0.117936	11.2023	3.97e-29	4.04e-28
VTCN1	485.154	2.80397	0.297513	9.42468	4.31e-21	2.75e-20
TBX15	478.029	3.7425	0.236336	15.8355	1.77e-56	6.76e-55
HSD3B1	1.23188	1.3602	0.6429	2.11573	0.034368	0.0486236
REG4	242.218	7.17059	0.543907	13.1835	1.09e-39	1.9e-38
FCGR1B	63.8321	-1.06677	0.149698	-7.12617	1.03e-12	3.82e-12
FAM72B	48.0489	2.28997	0.180535	12.6844	7.22e-37	1.1e-35
SRGAP2C	289.248	-1.13262	0.085626	-13.2275	6.09e-40	1.07e-38
FAM72C	19.1921	2.76663	0.240314	11.5125	1.14e-30	1.26e-29
FAM72D	28.9946	2.30674	0.198918	11.5964	4.3e-31	4.85e-30
GPR89A	210.29	1.06534	0.0790305	13.4801	2.05e-41	3.91e-40
PIAS3	2720.95	1.06285	0.0826393	12.8613	7.43e-38	1.18e-36
ITGA10	255.301	-1.03203	0.17416	-5.92575	3.11e-09	8.81e-09
ANKRD34A	92.9174	1.44986	0.172772	8.39174	4.79e-17	2.36e-16
HFE2	3.35168	1.4058	0.323797	4.34161	1.41e-05	2.94e-05
BCL9	2359.6	1.31223	0.0961575	13.6467	2.11e-42	4.24e-41
ACP6	1257.77	1.31875	0.0983271	13.4119	5.15e-41	9.63e-40
GJA5	1517.95	-1.68877	0.134983	-12.511	6.5e-36	9.42e-35
GPR89B	157.827	1.00923	0.0917695	10.9975	3.93e-28	3.78e-27
HIST2H2BF	119.008	2.52229	0.214263	11.7719	5.45e-32	6.46e-31
HIST2H3D	6.08616	1.59835	0.262697	6.08437	1.17e-09	3.43e-09
HIST2H4A	19.3517	2.25225	0.204052	11.0376	2.52e-28	2.45e-27
HIST2H3C	5.03344	1.34326	0.378863	3.5455	0.000391871	0.000703081
HIST2H2AA3	0.720368	1.16668	0.450466	2.58995	0.00959904	0.0146446
HIST2H2BE	1471.49	1.10763	0.159647	6.93801	3.98e-12	1.41e-11
HIST2H2AC	45.52	2.09222	0.231992	9.01852	1.91e-19	1.1e-18
HIST2H2AB	9.21074	3.90861	0.465156	8.40279	4.36e-17	2.16e-16
SV2A	406.701	1.30904	0.205443	6.37181	1.87e-10	5.83e-10
MTMR11	1241.11	1.42385	0.141326	10.0749	7.13e-24	5.43e-23
ANP32E	5497.4	1.1343	0.116685	9.72108	2.45e-22	1.7e-21
CIART	322.138	1.15131	0.162779	7.07284	1.52e-12	5.55e-12
TARS2	1851.11	1.04681	0.0747743	13.9997	1.57e-44	3.51e-43
ECM1	3592.58	1.64099	0.213582	7.68321	1.55e-14	6.48e-14
ADAMTSL4	1596.77	-1.82981	0.159068	-11.5033	1.27e-30	1.4e-29
HORMAD1	267.641	4.44166	0.33818	13.134	2.1e-39	3.62e-38
C1orf56	505.213	1.19956	0.10931	10.9739	5.1e-28	4.9e-27
MLLT11	704.38	1.71191	0.19718	8.68195	3.89e-18	2.07e-17
TNFAIP8L2	344.798	-1.00786	0.132379	-7.61347	2.67e-14	1.1e-13
LYSMD1	557.409	1.01693	0.0937691	10.8451	2.1e-27	1.95e-26
SELENBP1	10752.2	-1.23507	0.17635	-7.00349	2.5e-12	8.97e-12
CELF3	71.3276	3.49435	0.385404	9.06671	1.23e-19	7.14e-19
OAZ3	189.855	1.03985	0.112599	9.235	2.58e-20	1.57e-19
TDRKH	1424.65	1.38043	0.0959216	14.3913	5.87e-47	1.47e-45
C2CD4D	87.8001	2.55808	0.176969	14.4549	2.33e-47	5.99e-46
THEM5	297.135	1.89521	0.162752	11.6448	2.44e-31	2.78e-30
TCHHL1	1.64876	2.75222	0.736316	3.73783	0.000185616	0.0003446
RPTN	1.88096	1.63599	0.607137	2.69459	0.00704747	0.0109301
CRCT1	2.70281	2.41962	0.759544	3.18563	0.00144442	0.00243426
IVL	385.775	4.25181	0.397604	10.6936	1.09e-26	9.7e-26
SPRR1A	19.9537	3.16376	0.441764	7.16164	7.97e-13	2.97e-12
SPRR3	52.8747	4.06547	0.498769	8.15101	3.61e-16	1.69e-15
SPRR1B	240.911	5.39398	0.461355	11.6916	1.41e-31	1.63e-30
SPRR2D	89.4297	4.0277	0.452195	8.907	5.24e-19	2.94e-18
SPRR2A	16.3252	2.1458	0.497128	4.3164	1.59e-05	3.28e-05
SPRR2E	4.61807	1.73255	0.669461	2.58797	0.00965434	0.0147232
SPRR2F	13.3644	3.0657	0.537021	5.70871	1.14e-08	3.07e-08
PRR9	0.950124	-1.67972	0.655439	-2.56275	0.0103848	0.0157707
PGLYRP3	33.0849	5.90087	0.446188	13.2251	6.29e-40	1.11e-38
PGLYRP4	99.2647	4.28236	0.299841	14.2821	2.83e-46	6.91e-45
S100A9	14529	1.01894	0.262424	3.88282	0.000103252	0.000196715
S100A12	45.2589	-1.99871	0.26154	-7.64209	2.14e-14	8.85e-14
S100A7A	4.59763	3.15221	0.727604	4.33232	1.48e-05	3.06e-05
S100A7	46.9973	4.42662	0.516496	8.57049	1.03e-17	5.32e-17
S100A5	39.3951	1.79788	0.248983	7.22089	5.16e-13	1.95e-12
S100A4	10112.8	-1.05325	0.185929	-5.66477	1.47e-08	3.94e-08
S100A3	115.983	-2.3712	0.173144	-13.6949	1.09e-42	2.21e-41
S100A2	1811.07	3.39972	0.266745	12.7452	3.32e-37	5.11e-36
S100A16	9503.98	1.24843	0.153143	8.15209	3.58e-16	1.68e-15
ILF2	10461.6	1.05928	0.0824853	12.842	9.53e-38	1.51e-36
NPR1	960.33	-2.60805	0.165737	-15.7361	8.56e-56	3.19e-54
SLC27A3	1861.5	-1.31112	0.115142	-11.387	4.85e-30	5.19e-29
CREB3L4	1180.64	1.39105	0.113061	12.3036	8.67e-35	1.19e-33
NUP210L	102.591	2.43394	0.239027	10.1827	2.37e-24	1.86e-23
C1orf189	34.8812	-1.90425	0.280244	-6.79495	1.08e-11	3.73e-11
AQP10	6.51789	-2.23749	0.254887	-8.77835	1.66e-18	9.03e-18
CHRNB2	21.9171	1.30447	0.258593	5.04447	4.55e-07	1.07e-06
KCNN3	446.409	-1.03873	0.149577	-6.94449	3.8e-12	1.35e-11
CKS1B	1321.11	1.73525	0.132662	13.0803	4.27e-39	7.24e-38
FLAD1	2437.17	1.40437	0.088056	15.9486	2.92e-57	1.16e-55
LENEP	4.01934	1.81579	0.308595	5.88404	4e-09	1.13e-08
DCST2	107.123	2.37043	0.180417	13.1386	1.98e-39	3.41e-38
DCST1	43.5243	2.68997	0.183953	14.6231	2e-48	5.37e-47
EFNA4	885.971	2.18864	0.109747	19.9426	1.74e-88	2.7e-86
AL691442.1	0.690937	1.51783	0.423546	3.58362	0.000338862	0.000612186
EFNA3	261.929	3.07037	0.152663	20.112	5.79e-90	1.01e-87
SLC50A1	4930.93	1.77023	0.114986	15.3952	1.76e-53	6.05e-52
KRTCAP2	1346.98	1.09136	0.0931232	11.7196	1.01e-31	1.18e-30
TRIM46	282.036	1.80034	0.159955	11.2553	2.18e-29	2.24e-28
CLK2	2241.35	1.02822	0.0814138	12.6296	1.45e-36	2.17e-35
HCN3	312.397	1.79762	0.131793	13.6397	2.32e-42	4.65e-41
PKLR	2.16424	1.64408	0.394532	4.16716	3.08e-05	6.2e-05
RUSC1	2473.62	1.14361	0.0830469	13.7706	3.83e-43	7.99e-42
MSTO1	707.171	1.49663	0.0874211	17.1197	1.06e-65	5.98e-64
KIAA0907	2521.72	1.49389	0.0962351	15.5233	2.41e-54	8.6e-53
RAB25	5989.27	1.06793	0.116584	9.1602	5.18e-20	3.08e-19
MEX3A	1323.19	4.19448	0.185826	22.5721	8.15e-113	6.38e-110
BGLAP	41.3804	1.08193	0.178004	6.07811	1.22e-09	3.56e-09
PAQR6	156.521	1.67617	0.184208	9.09936	9.09e-20	5.33e-19
TMEM79	488.579	1.32971	0.0957759	13.8835	7.97e-44	1.73e-42
CCT3	14815.5	1.35164	0.0884713	15.2777	1.08e-52	3.53e-51
TSACC	37.716	3.1008	0.188861	16.4185	1.41e-60	6.42e-59
RHBG	47.765	4.6593	0.278002	16.76	4.79e-63	2.39e-61
C1orf61	167.477	5.53097	0.347566	15.9134	5.12e-57	2e-55
IQGAP3	1359.39	3.61553	0.151169	23.9171	2.03e-126	3.61e-123
TTC24	21.5895	1.56054	0.222317	7.01942	2.23e-12	8.03e-12
NAXE	5692.11	1.08585	0.107582	10.0932	5.92e-24	4.54e-23
BCAN	79.8212	2.84218	0.22551	12.6034	2.02e-36	3.01e-35
NES	2854.92	-1.57791	0.145981	-10.809	3.12e-27	2.85e-26
CRABP2	8021.1	5.57696	0.249941	22.3131	2.76e-110	1.8e-107
MRPL24	2882.98	1.09504	0.102583	10.6747	1.34e-26	1.19e-25
HDGF	18065.3	1.01954	0.0828283	12.3091	8.09e-35	1.11e-33
INSRR	7.11098	2.09173	0.288181	7.2584	3.92e-13	1.5e-12
PEAR1	423.108	-1.99437	0.127842	-15.6002	7.25e-55	2.62e-53
LRRC71	84.8471	-2.05479	0.305378	-6.72868	1.71e-11	5.79e-11
FCRL5	675.032	2.57316	0.214658	11.9873	4.14e-33	5.2e-32
FCRL4	22.8183	2.5047	0.271351	9.2305	2.69e-20	1.63e-19
FCRL2	183.03	1.94856	0.2219	8.78125	1.62e-18	8.82e-18
CD5L	22.1751	-4.06112	0.25785	-15.7499	6.88e-56	2.59e-54
CD1A	436.359	1.5362	0.283878	5.41149	6.25e-08	1.59e-07
OR6K3	1.82797	-4.38744	0.336991	-13.0195	9.48e-39	1.58e-37
OR6N1	0.346491	-2.82128	0.638335	-4.41975	9.88e-06	2.08e-05
MNDA	1023.05	-1.47887	0.145284	-10.1792	2.46e-24	1.92e-23
AIM2	460.231	2.78619	0.232426	11.9874	4.13e-33	5.19e-32
CADM3	174.659	-1.02945	0.21431	-4.80356	1.56e-06	3.51e-06
ACKR1	850.156	-2.35897	0.209597	-11.2548	2.19e-29	2.26e-28
APCS	1.23958	2.54537	1.08125	2.35409	0.0185681	0.0272807
DUSP23	2454.35	1.03819	0.139307	7.45256	9.15e-14	3.64e-13
CFAP45	381.322	-1.00326	0.215461	-4.65634	3.22e-06	7.05e-06
IGSF9	1251.66	3.24665	0.164566	19.7285	1.23e-86	1.67e-84
SLAMF9	50.8341	1.91586	0.221968	8.63125	6.07e-18	3.19e-17
KCNJ10	74.7112	2.13662	0.219588	9.73013	2.24e-22	1.55e-21
ATP1A2	148.35	-2.26807	0.20743	-10.9341	7.92e-28	7.5e-27
SLAMF7	2138.01	1.13341	0.169485	6.68736	2.27e-11	7.62e-11
CD244	112.044	-1.34694	0.149967	-8.98161	2.67e-19	1.52e-18
ITLN1	220.26	-4.73152	0.317168	-14.918	2.52e-50	7.45e-49
ITLN2	243.724	-4.61664	0.362561	-12.7334	3.86e-37	5.93e-36
ARHGAP30	2071.38	-1.15371	0.113448	-10.1695	2.71e-24	2.12e-23
NECTIN4	2980.89	2.3433	0.133587	17.5414	6.92e-69	4.5e-67
ADAMTS4	1261.76	-1.29998	0.195844	-6.63783	3.18e-11	1.05e-10
FCER1G	2848.21	-1.24212	0.13312	-9.33081	1.05e-20	6.55e-20
APOA2	3.57363	1.10165	0.354076	3.11134	0.0018624	0.00309782
PCP4L1	994.767	1.46342	0.263571	5.55225	2.82e-08	7.38e-08
HSPA6	656.937	1.16661	0.191209	6.10125	1.05e-09	3.1e-09
FCGR3A	5655.61	-1.28868	0.149874	-8.59839	8.08e-18	4.21e-17
FCGR3B	173.094	-2.37226	0.218077	-10.8781	1.47e-27	1.37e-26
FCRLA	195.423	1.81086	0.224502	8.06613	7.26e-16	3.34e-15
SPATA46	16.8676	1.32926	0.216841	6.13009	8.78e-10	2.61e-09
SH2D1B	45.6995	-1.78436	0.186687	-9.55802	1.2e-21	7.95e-21
DDR2	1629.32	-1.12679	0.136343	-8.26438	1.4e-16	6.75e-16
RGS5	4957.57	-1.06092	0.134005	-7.91699	2.43e-15	1.08e-14
NUF2	566.724	3.72167	0.173164	21.4922	1.84e-102	6.32e-100
RXRG	91.9117	-2.33289	0.269051	-8.67081	4.29e-18	2.27e-17
UCK2	1348.64	1.30309	0.155013	8.40637	4.23e-17	2.1e-16
MAEL	26.551	1.99151	0.308472	6.45604	1.07e-10	3.42e-10
GPA33	208.255	-2.71828	0.278645	-9.75535	1.75e-22	1.22e-21
DUSP27	26.3074	-1.45385	0.36886	-3.94146	8.1e-05	0.000156289
ADCY10	11.9858	1.16133	0.204277	5.68508	1.31e-08	3.51e-08
DPT	1296.94	-1.48252	0.180456	-8.21545	2.11e-16	1e-15
ATP1B1	29145.3	1.30319	0.146272	8.90937	5.13e-19	2.88e-18
CCDC181	107.877	-1.11264	0.209769	-5.30409	1.13e-07	2.82e-07
F5	926.282	2.35042	0.263584	8.91717	4.78e-19	2.68e-18
SELP	496.26	-2.31104	0.153199	-15.0852	2.03e-51	6.33e-50
C1orf112	423.936	1.74428	0.0975757	17.8762	1.81e-71	1.29e-69
SELE	230.6	-2.93053	0.222918	-13.1463	1.79e-39	3.09e-38
METTL11B	4.81422	4.26464	0.416862	10.2303	1.45e-24	1.15e-23
MROH9	32.8112	-2.32328	0.316853	-7.33234	2.26e-13	8.78e-13
FMO3	602.956	-1.14293	0.162331	-7.04073	1.91e-12	6.94e-12
FMO2	2788.61	-3.26022	0.16905	-19.2855	7.11e-83	7.98e-81
FMO1	149.324	1.26083	0.185883	6.78292	1.18e-11	4.04e-11
MYOC	38.6881	-4.49623	0.306707	-14.6597	1.17e-48	3.16e-47
C1orf105	6.2175	3.45979	0.379122	9.12577	7.12e-20	4.2e-19
TNFSF4	221.225	1.21201	0.142768	8.48937	2.08e-17	1.05e-16
CENPL	409.765	1.40779	0.100676	13.9834	1.97e-44	4.39e-43
DARS2	1648.2	1.22075	0.0927785	13.1576	1.54e-39	2.67e-38
GPR52	4.83596	2.51868	0.462866	5.4415	5.28e-08	1.36e-07
KIAA0040	2550.78	-1.26507	0.0832749	-15.1915	4.03e-52	1.29e-50
TNR	69.4234	-3.82304	0.254564	-15.018	5.6e-51	1.72e-49
BRINP2	10.4352	1.08139	0.310541	3.48228	0.000497159	0.000881788
TEX35	3.40737	1.846	0.380566	4.85066	1.23e-06	2.8e-06
RALGPS2	1565.29	1.6547	0.111119	14.8912	3.76e-50	1.1e-48
ANGPTL1	187.852	-2.28408	0.199284	-11.4614	2.06e-30	2.25e-29
TDRD5	159.629	3.67397	0.309194	11.8824	1.46e-32	1.78e-31
FAM163A	11.6802	1.74417	0.233503	7.46957	8.05e-14	3.22e-13
LHX4	89.117	1.04027	0.157843	6.59057	4.38e-11	1.43e-10
XPR1	7432.06	1.88855	0.123872	15.246	1.75e-52	5.66e-51
CACNA1E	39.9416	2.6881	0.263803	10.1898	2.2e-24	1.73e-23
ZNF648	6.29354	3.00624	0.404192	7.43764	1.03e-13	4.06e-13
RGSL1	1.13971	1.16374	0.460382	2.52777	0.011479	0.0173342
RGS16	1714.19	-1.05815	0.142945	-7.40246	1.34e-13	5.26e-13
SHCBP1L	1.14786	1.65186	0.608318	2.71546	0.00661843	0.0102982
NMNAT2	874.512	2.61917	0.26332	9.94671	2.61e-23	1.92e-22
NCF2	2450.66	-1.69214	0.1303	-12.9865	1.46e-38	2.41e-37
APOBEC4	63.4376	-1.83762	0.34542	-5.31996	1.04e-07	2.59e-07
COLGALT2	201.276	-1.18744	0.246131	-4.8244	1.4e-06	3.18e-06
C1orf21	2152.04	-1.08056	0.13336	-8.10258	5.38e-16	2.49e-15
PRG4	663.491	-3.0363	0.258345	-11.7529	6.83e-32	8.04e-31
OCLM	25.6235	1.49111	0.199919	7.45859	8.75e-14	3.49e-13
PDC	5.8974	1.67566	0.32555	5.14716	2.64e-07	6.37e-07
PLA2G4A	2581.66	2.43483	0.218196	11.1589	6.48e-29	6.5e-28
RGS18	155.424	-1.02884	0.154575	-6.65596	2.81e-11	9.35e-11
RGS13	74.0549	-1.44582	0.199659	-7.24146	4.44e-13	1.69e-12
KCNT2	144.683	-2.45651	0.210516	-11.669	1.84e-31	2.11e-30
CFHR3	54.1338	2.15388	0.232838	9.25053	2.23e-20	1.36e-19
CFHR4	2.61985	3.38431	0.544146	6.21949	4.99e-10	1.51e-09
CFHR5	1.3769	2.2837	0.506745	4.50661	6.59e-06	1.41e-05
F13B	0.829555	1.90629	0.625244	3.04887	0.00229705	0.00378282
ASPM	990.366	3.73909	0.171841	21.759	5.67e-105	2.41e-102
C1orf53	182.243	1.0996	0.140869	7.80582	5.91e-15	2.55e-14
NR5A2	216.446	-1.15874	0.151217	-7.66276	1.82e-14	7.57e-14
KIF14	441.564	3.75714	0.170304	22.0614	7.42e-108	3.82e-105
INAVA	1917.34	2.17883	0.138494	15.7323	9.08e-56	3.38e-54
CACNA1S	12.4713	-3.32415	0.317935	-10.4554	1.38e-25	1.16e-24
ASCL5	45.9657	1.12948	0.207979	5.43074	5.61e-08	1.44e-07
PKP1	1724.11	2.25449	0.328096	6.87145	6.36e-12	2.23e-11
LAD1	6754.81	1.95381	0.136865	14.2754	3.11e-46	7.58e-45
LMOD1	1013.1	-1.8259	0.14306	-12.7632	2.63e-37	4.08e-36
GPR37L1	34.2512	1.16872	0.197445	5.9192	3.24e-09	9.15e-09
UBE2T	829.448	3.31108	0.14683	22.5504	1.33e-112	1e-109
SYT2	198.074	2.85944	0.248601	11.5021	1.29e-30	1.42e-29
KDM5B	5415.17	1.07	0.07632	14.0199	1.18e-44	2.66e-43
PPFIA4	245.891	2.40677	0.197269	12.2005	3.09e-34	4.12e-33
ADORA1	465.439	1.09518	0.228703	4.78864	1.68e-06	3.77e-06
MYBPH	148.612	3.29812	0.327297	10.0769	6.99e-24	5.33e-23
CHI3L1	8349.83	1.30116	0.232778	5.58969	2.27e-08	6e-08
BTG2	8301.67	-1.28878	0.14363	-8.97297	2.89e-19	1.64e-18
PRELP	4479.74	-1.55845	0.159866	-9.74848	1.87e-22	1.3e-21
OPTC	0.930839	1.46684	0.482615	3.03936	0.0023708	0.00389968
SNRPE	2304.04	1.13565	0.0856689	13.2563	4.15e-40	7.38e-39
ETNK2	574.26	1.40026	0.155938	8.97962	2.72e-19	1.55e-18
KISS1	41.094	2.01181	0.244654	8.2231	1.98e-16	9.44e-16
PLEKHA6	2583.7	1.62703	0.153132	10.625	2.28e-26	1.99e-25
NFASC	503.557	-1.33973	0.170919	-7.83841	4.56e-15	1.99e-14
CNTN2	12.2994	1.67106	0.29271	5.70891	1.14e-08	3.07e-08
KLHDC8A	105.051	2.12539	0.222376	9.55762	1.2e-21	7.97e-21
LEMD1	182.527	2.79951	0.232904	12.02	2.79e-33	3.54e-32
MFSD4A	2347.2	1.49687	0.22197	6.7436	1.55e-11	5.24e-11
CTSE	13823.7	1.26775	0.290188	4.36871	1.25e-05	2.61e-05
AVPR1B	4.86394	2.99035	0.416847	7.17373	7.3e-13	2.73e-12
FAM72A	50.109	1.32692	0.152261	8.71481	2.91e-18	1.56e-17
IKBKE	904.751	1.14407	0.087771	13.0347	7.76e-39	1.3e-37
IL19	5.75383	2.5383	0.40361	6.28899	3.2e-10	9.79e-10
IL20	2.65487	-1.25856	0.371071	-3.39171	0.000694587	0.00121406
FCAMR	21.1176	1.58066	0.260701	6.0631	1.34e-09	3.9e-09
C4BPB	488.629	2.20927	0.268868	8.21695	2.09e-16	9.93e-16
CR2	558.365	1.72999	0.26048	6.64157	3.1e-11	1.03e-10
CD34	2756.95	-1.65469	0.111814	-14.7985	1.5e-49	4.28e-48
LAMB3	18907.5	1.02061	0.162649	6.27488	3.5e-10	1.07e-09
C1orf74	276.91	1.20482	0.0740142	16.2783	1.41e-59	6.08e-58
DIEXF	1535.26	1.02036	0.070423	14.489	1.42e-47	3.71e-46
SYT14	46.2373	4.4772	0.394664	11.3443	7.91e-30	8.34e-29
KCNH1	9.50317	1.39876	0.248565	5.62735	1.83e-08	4.86e-08
TRAF5	1255.75	1.33735	0.116818	11.4482	2.4e-30	2.61e-29
RD3	5.9249	-1.91324	0.230747	-8.29153	1.12e-16	5.41e-16
NEK2	680.652	3.73565	0.168313	22.1946	3.87e-109	2.16e-106
LPGAT1	4898.3	1.08619	0.0923937	11.7561	6.57e-32	7.74e-31
DTL	719.263	1.84906	0.135325	13.6638	1.67e-42	3.37e-41
ATF3	3268.38	-1.75695	0.178909	-9.82039	9.2e-23	6.53e-22
FAM71A	0.73812	-3.54924	0.45481	-7.8038	6.01e-15	2.59e-14
FLVCR1	1115.18	1.2538	0.103759	12.0838	1.29e-33	1.66e-32
PROX1	419.972	1.00253	0.234113	4.28225	1.85e-05	3.8e-05
CENPF	2343.1	3.48251	0.161401	21.5768	2.97e-103	1.06e-100
KCNK2	34.9213	1.81543	0.314125	5.77931	7.5e-09	2.06e-08
TGFB2	778.554	-1.07488	0.185691	-5.78855	7.1e-09	1.95e-08
SLC30A10	7.16729	3.72784	0.562738	6.62447	3.49e-11	1.15e-10
C1orf115	1328.82	-1.58356	0.147687	-10.7224	7.99e-27	7.15e-26
2021-03-02	933.293	-1.45468	0.121578	-11.965	5.42e-33	6.76e-32
HLX	492.558	-1.25491	0.123149	-10.1902	2.19e-24	1.72e-23
HHIPL2	420.364	6.01433	0.337491	17.8207	4.88e-71	3.46e-69
FAM177B	215.832	3.2581	0.278418	11.7022	1.24e-31	1.44e-30
DISP1	754.48	-1.00962	0.111282	-9.07266	1.16e-19	6.77e-19
SUSD4	737.12	1.2483	0.193593	6.44807	1.13e-10	3.6e-10
CCDC185	17.2133	4.64766	0.359563	12.9259	3.22e-38	5.19e-37
CAPN8	4351.56	1.39686	0.205216	6.80677	9.98e-12	3.44e-11
DNAH14	535.338	2.09637	0.139339	15.0451	3.72e-51	1.15e-49
LEFTY2	61.6713	-1.89441	0.23863	-7.93867	2.04e-15	9.15e-15
MIXL1	43.6735	2.00741	0.205133	9.78591	1.29e-22	9.12e-22
STUM	411.771	2.41971	0.324993	7.44541	9.66e-14	3.84e-13
WNT9A	494.936	-1.26265	0.140111	-9.01178	2.03e-19	1.17e-18
WNT3A	113.119	-4.07668	0.257014	-15.8617	1.17e-56	4.48e-55
GJC2	98.9693	-1.4064	0.154372	-9.11046	8.2e-20	4.83e-19
TRIM17	238.032	2.1885	0.225084	9.72306	2.4e-22	1.66e-21
HIST3H3	1.57408	1.20857	0.338404	3.57139	0.000355087	0.000640493
HIST3H2A	388.796	2.37398	0.236144	10.0531	8.9e-24	6.73e-23
TMEM78	1.31466	2.18189	0.351727	6.20335	5.53e-10	1.67e-09
AGT	1185.31	2.79297	0.271963	10.2697	9.65e-25	7.74e-24
C1orf198	5997.38	-1.21389	0.0861506	-14.0903	4.35e-45	1.01e-43
TRIM67	15.8937	2.36472	0.234964	10.0641	7.96e-24	6.04e-23
C1orf131	614.758	1.01563	0.0622383	16.3183	7.31e-60	3.21e-58
MAP10	224.301	1.35975	0.14503	9.37568	6.87e-21	4.34e-20
KCNK1	1900.64	1.37186	0.158734	8.64252	5.5e-18	2.9e-17
SLC35F3	141.449	2.14676	0.238811	8.98937	2.49e-19	1.42e-18
COA6	1146.98	1.18375	0.116613	10.1511	3.28e-24	2.55e-23
GNG4	448.234	4.26905	0.314194	13.5873	4.76e-42	9.41e-41
ERO1B	1316.43	1.13935	0.186197	6.11906	9.41e-10	2.78e-09
EDARADD	177.019	1.58997	0.231812	6.8589	6.94e-12	2.42e-11
HEATR1	2262.7	1.07146	0.0795924	13.4619	2.62e-41	4.97e-40
ACTN2	55.3805	-2.76245	0.205329	-13.4538	2.92e-41	5.54e-40
RGS7	57.6834	2.97047	0.349147	8.50782	1.77e-17	9e-17
KMO	258.013	-1.31051	0.139407	-9.40063	5.42e-21	3.44e-20
CHML	1975.84	1.33531	0.14549	9.17804	4.39e-20	2.62e-19
WDR64	12.0509	1.80332	0.213403	8.45026	2.91e-17	1.45e-16
EXO1	421.072	3.59645	0.169702	21.1927	1.11e-99	3.07e-97
BECN2	4.49812	3.92097	0.397298	9.86908	5.67e-23	4.08e-22
MAP1LC3C	126.434	-1.43165	0.217995	-6.56737	5.12e-11	1.67e-10
PLD5	252.691	2.77056	0.285022	9.72049	2.47e-22	1.7e-21
AKT3	1292.01	-1.00463	0.13568	-7.40442	1.32e-13	5.19e-13
KIF26B	2085.39	3.13856	0.148934	21.0735	1.39e-98	3.54e-96
TFB2M	1087.48	1.18557	0.0825926	14.3544	1e-46	2.48e-45
ZNF695	53.4578	4.4602	0.283569	15.7288	9.6e-56	3.56e-54
ZNF670-ZNF695	9.51166	2.13022	0.234528	9.08299	1.06e-19	6.18e-19
OR2B11	0.904528	-1.81119	0.380487	-4.76019	1.93e-06	4.32e-06
GCSAML	50.1288	-1.5938	0.219435	-7.26318	3.78e-13	1.45e-12
TRIM58	35.8443	-2.10086	0.292394	-7.18503	6.72e-13	2.52e-12
OR2W3	5.72768	-2.24206	0.337492	-6.64329	3.07e-11	1.02e-10
LYPD8	26.2482	4.26742	0.404316	10.5547	4.83e-26	4.14e-25
ZNF692	1351.35	1.6404	0.121038	13.5527	7.63e-42	1.49e-40
ALKAL2	70.4981	-3.01303	0.216797	-13.898	6.52e-44	1.42e-42
SNTG2	9.99335	-1.13782	0.269941	-4.21506	2.5e-05	5.06e-05
TPO	26.5411	1.89394	0.250494	7.56083	4.01e-14	1.63e-13
ALLC	1.63784	1.88132	0.555763	3.3851	0.000711512	0.00124226
DCDC2C	0.460261	-1.67303	0.418752	-3.99528	6.46e-05	0.000125906
SOX11	152.354	4.3021	0.349216	12.3193	7.13e-35	9.84e-34
GRHL1	1090.3	1.54209	0.154885	9.95633	2.37e-23	1.74e-22
CYS1	385.409	-1.45891	0.227201	-6.42126	1.35e-10	4.26e-10
RRM2	2333.63	3.22409	0.161791	19.9276	2.35e-88	3.59e-86
HPCAL1	4207.05	-1.08335	0.0966636	-11.2074	3.75e-29	3.82e-28
ODC1	14223.7	1.28375	0.222562	5.76807	8.02e-09	2.19e-08
ATP6V1C2	484.017	2.99222	0.21853	13.6925	1.13e-42	2.29e-41
PDIA6	13348.4	1.03648	0.0928473	11.1633	6.17e-29	6.21e-28
KCNF1	56.4291	1.61625	0.276443	5.84659	5.02e-09	1.4e-08
GREB1	484.13	2.69421	0.222876	12.0884	1.22e-33	1.57e-32
NTSR2	0.925472	1.64821	0.557687	2.95544	0.00312219	0.0050674
MYCN	167.588	3.31544	0.305091	10.867	1.65e-27	1.54e-26
FAM49A	972.306	-1.39161	0.120137	-11.5835	4.99e-31	5.62e-30
RAD51AP2	5.22922	1.58731	0.307908	5.15515	2.53e-07	6.11e-07
GEN1	662.907	1.14569	0.102656	11.1605	6.37e-29	6.39e-28
MATN3	576.163	-1.51926	0.184963	-8.21387	2.14e-16	1.02e-15
APOB	43.1294	1.12014	0.314434	3.56241	0.000367464	0.000661233
TDRD15	1.89943	1.60369	0.503046	3.18796	0.00143282	0.00241596
PFN4	47.1273	1.30545	0.139986	9.32558	1.1e-20	6.87e-20
CENPO	585.03	1.03606	0.0956305	10.834	2.37e-27	2.19e-26
EFR3B	518.421	-1.11126	0.185375	-5.99464	2.04e-09	5.86e-09
KIF3C	912.094	1.09395	0.152036	7.19536	6.23e-13	2.34e-12
GAREM2	396.39	1.96027	0.155119	12.6372	1.32e-36	1.98e-35
SELENOI	2615.12	1.28467	0.10339	12.4254	1.9e-35	2.69e-34
DRC1	218.592	-1.93913	0.284851	-6.80752	9.93e-12	3.42e-11
KCNK3	907.912	-2.18574	0.230908	-9.46584	2.91e-21	1.88e-20
CENPA	283.87	3.6314	0.1824	19.909	3.4e-88	5.12e-86
DPYSL5	12.5936	4.5109	0.55489	8.12937	4.32e-16	2.01e-15
CGREF1	326.944	4.12651	0.243776	16.9274	2.82e-64	1.51e-62
SLC5A6	1637.31	1.14296	0.0839847	13.6091	3.54e-42	7.04e-41
CAD	3141.95	1.11584	0.096869	11.5191	1.06e-30	1.17e-29
SLC30A3	46.1973	1.29232	0.256157	5.04505	4.53e-07	1.07e-06
DNAJC5G	3.35467	1.43128	0.321161	4.45657	8.33e-06	1.76e-05
TRIM54	110.266	3.71585	0.296063	12.5509	3.93e-36	5.77e-35
UCN	51.9008	1.43546	0.167054	8.59277	8.49e-18	4.41e-17
KRTCAP3	2292.01	1.57296	0.144885	10.8566	1.86e-27	1.72e-26
FNDC4	595.676	1.95876	0.188969	10.3655	3.56e-25	2.92e-24
GCKR	48.4657	3.04526	0.285596	10.6628	1.52e-26	1.34e-25
SPDYA	47.4995	1.30868	0.173287	7.55212	4.28e-14	1.74e-13
TOGARAM2	224.186	-1.57135	0.221545	-7.09266	1.32e-12	4.83e-12
C2orf71	22.1547	-2.96545	0.306052	-9.68938	3.35e-22	2.29e-21
LBH	7356.47	-1.00545	0.107903	-9.31815	1.18e-20	7.35e-20
CAPN13	2082.83	1.32679	0.229361	5.78471	7.26e-09	1.99e-08
GALNT14	919.374	3.67279	0.217349	16.8981	4.65e-64	2.43e-62
CAPN14	43.1475	1.97949	0.243346	8.13449	4.14e-16	1.93e-15
XDH	993.151	3.99732	0.220939	18.0924	3.66e-73	2.71e-71
NLRC4	269.569	-2.08473	0.121599	-17.1444	6.93e-66	3.99e-64
CRIM1	4601.15	-1.34478	0.115303	-11.663	1.97e-31	2.26e-30
VIT	11.4847	-2.36772	0.243857	-9.70945	2.75e-22	1.89e-21
QPCT	2119.15	2.65303	0.235437	11.2685	1.88e-29	1.94e-28
TMEM178A	174.144	-1.18379	0.210027	-5.63639	1.74e-08	4.62e-08
C2orf91	26.2113	-2.87273	0.241344	-11.9031	1.14e-32	1.4e-31
PKDCC	798.234	-1.15963	0.181108	-6.40296	1.52e-10	4.79e-10
PLEKHH2	1198.79	-1.27289	0.161309	-7.89102	3e-15	1.32e-14
ABCG8	1.875	1.94737	0.463814	4.19861	2.69e-05	5.43e-05
SIX3	33.6909	1.5842	0.38914	4.07103	4.68e-05	9.25e-05
SIX2	291.222	3.29969	0.288369	11.4426	2.56e-30	2.78e-29
PRKCE	1056.19	-1.85903	0.0942857	-19.7169	1.54e-86	2.08e-84
EPAS1	27617.9	-2.70473	0.109916	-24.6072	1.06e-133	5.18e-130
STPG4	15.0408	2.30814	0.309346	7.46134	8.56e-14	3.42e-13
EPCAM	20873.7	1.61876	0.100203	16.1548	1.05e-58	4.42e-57
KCNK12	41.3024	3.21542	0.271197	11.8564	1.99e-32	2.41e-31
STON1	445.711	-1.1752	0.122267	-9.61176	7.13e-22	4.79e-21
STON1-GTF2A1L	4.63832	-1.49848	0.194836	-7.691	1.46e-14	6.11e-14
LHCGR	16.979	2.74596	0.380632	7.21421	5.42e-13	2.05e-12
FSHR	0.758685	-1.6672	0.371275	-4.49046	7.11e-06	1.51e-05
CHAC2	182.988	1.03028	0.121285	8.4947	1.98e-17	1e-16
TSPYL6	3.9903	1.49081	0.476777	3.12685	0.00176693	0.00294855
C2orf73	24.7029	-1.69584	0.272581	-6.22141	4.93e-10	1.49e-09
SPTBN1	22991.6	-1.75898	0.0928139	-18.9516	4.28e-80	4.16e-78
EFEMP1	6411.65	-1.60499	0.147293	-10.8966	1.2e-27	1.12e-26
CCDC85A	89.3508	-2.8267	0.176977	-15.9721	2e-57	7.98e-56
OTX1	271.389	3.33974	0.173628	19.235	1.88e-82	2.06e-80
LGALSL	1213.77	-1.82149	0.12583	-14.4759	1.72e-47	4.47e-46
SLC1A4	2130.96	1.11035	0.102587	10.8235	2.66e-27	2.45e-26
MEIS1	785.049	-1.07221	0.124356	-8.6221	6.57e-18	3.44e-17
AC017083.4	0.893182	1.03961	0.336075	3.09339	0.00197886	0.00328204
CNRIP1	400.211	-1.47838	0.106912	-13.8279	1.73e-43	3.68e-42
PROKR1	6.36676	1.86838	0.301894	6.18887	6.06e-10	1.82e-09
GKN2	977.642	-1.80232	0.391574	-4.60274	4.17e-06	9.06e-06
GKN1	2.19059	1.58052	0.746718	2.11662	0.0342918	0.0485368
GFPT1	8597.65	1.15556	0.0888001	13.0131	1.03e-38	1.71e-37
ASPRV1	46.0432	-1.03865	0.113835	-9.12413	7.23e-20	4.27e-19
PCYOX1	6706.07	-1.12414	0.0831136	-13.5253	1.11e-41	2.14e-40
FAM136A	2160.1	1.18356	0.0707981	16.7175	9.78e-63	4.78e-61
TGFA	1851.08	1.4206	0.172775	8.22225	2e-16	9.51e-16
FIGLA	0.628057	-1.61693	0.344376	-4.69525	2.66e-06	5.87e-06
CD207	569.329	1.40715	0.298557	4.71316	2.44e-06	5.4e-06
VAX2	49.7598	1.47816	0.205094	7.2072	5.71e-13	2.15e-12
CYP26B1	300.988	-1.08296	0.17265	-6.27256	3.55e-10	1.08e-09
EMX1	11.0398	3.00156	0.356894	8.41024	4.09e-17	2.03e-16
NOTO	15.0208	2.66362	0.44061	6.04529	1.49e-09	4.34e-09
FBXO41	659.081	1.71287	0.130269	13.1487	1.73e-39	3e-38
EGR4	22.5613	1.99132	0.299224	6.65497	2.83e-11	9.41e-11
NAT8	3.72146	-1.041	0.255984	-4.06665	4.77e-05	9.42e-05
ACTG2	935.923	-1.25733	0.184276	-6.82309	8.91e-12	3.08e-11
MTHFD2	3843.76	1.50747	0.12677	11.8914	1.31e-32	1.61e-31
LBX2	66.5423	2.11814	0.140108	15.118	1.23e-51	3.88e-50
TLX2	9.58903	2.73342	0.322086	8.48664	2.13e-17	1.07e-16
DQX1	59.6372	3.03998	0.281342	10.8053	3.25e-27	2.97e-26
LRRTM4	16.4463	-1.77689	0.276082	-6.43607	1.23e-10	3.88e-10
REG1A	53.1746	5.00743	0.642073	7.79884	6.25e-15	2.7e-14
REG3A	1.80522	2.29682	1.00086	2.29484	0.0217422	0.0316281
CTNNA2	12.0292	1.24543	0.362249	3.43804	0.000585943	0.00103196
LRRTM1	40.0514	2.23987	0.412721	5.42708	5.73e-08	1.47e-07
DNAH6	234.648	-1.26463	0.238146	-5.31032	1.09e-07	2.73e-07
SH2D6	35.298	1.28207	0.19862	6.45491	1.08e-10	3.44e-10
ATOH8	1849.93	-1.51836	0.227228	-6.6821	2.36e-11	7.88e-11
REEP1	207.523	-1.63964	0.213849	-7.66728	1.76e-14	7.32e-14
RNF103-CHMP3	5.49302	1.66556	0.244882	6.80148	1.04e-11	3.57e-11
FOXI3	132.538	6.8314	0.44711	15.279	1.06e-52	3.46e-51
TEX37	0.914033	1.99737	0.539858	3.69981	0.000215764	0.000398527
AL845331.2	3.303	1.60591	0.313739	5.11864	3.08e-07	7.37e-07
ANKRD20A8P	1.7429	1.56421	0.486487	3.21532	0.00130299	0.00220924
TEKT4	33.9751	-1.74776	0.282075	-6.19609	5.79e-10	1.74e-09
MAL	307.646	-1.29691	0.189221	-6.85396	7.18e-12	2.5e-11
PROM2	3925.58	2.61586	0.157703	16.5872	8.62e-62	4.08e-60
ANKRD36C	310.454	2.33672	0.241379	9.68071	3.64e-22	2.49e-21
GPAT2	323.314	1.4637	0.263647	5.55173	2.83e-08	7.4e-08
NCAPH	613.541	3.00906	0.158401	18.9965	1.82e-80	1.81e-78
NEURL3	50.7629	1.05507	0.224382	4.70213	2.57e-06	5.69e-06
ARID5A	1332.83	-1.07876	0.0960771	-11.228	2.97e-29	3.04e-28
FAM178B	155.509	2.93435	0.220865	13.2857	2.8e-40	5.03e-39
ANKRD36	216.547	1.10114	0.196207	5.61213	2e-08	5.3e-08
ANKRD36B	109.981	1.15112	0.191556	6.00934	1.86e-09	5.38e-09
VWA3B	279.208	-1.82414	0.264158	-6.90549	5e-12	1.76e-11
CNGA3	303.462	4.82151	0.361989	13.3195	1.78e-40	3.25e-39
C2orf15	197.76	1.19498	0.109381	10.9249	8.77e-28	8.27e-27
LYG1	42.3124	1.30457	0.155736	8.37679	5.44e-17	2.68e-16
AFF3	516.472	-2.36168	0.214661	-11.0019	3.74e-28	3.61e-27
NPAS2	1192.88	1.22961	0.149057	8.24929	1.59e-16	7.63e-16
CNOT11	3515.86	1.13063	0.0643365	17.5737	3.92e-69	2.56e-67
CREG2	62.5094	2.50908	0.268273	9.35273	8.54e-21	5.35e-20
RFX8	35.1572	2.15304	0.200494	10.7387	6.7e-27	6.03e-26
IL1RL2	152.615	2.2859	0.15311	14.9298	2.11e-50	6.29e-49
IL1RL1	601.593	-2.85754	0.277733	-10.2888	7.92e-25	6.37e-24
IL18R1	296.742	-1.49865	0.149249	-10.0412	1e-23	7.57e-23
SLC9A4	21.1176	4.40364	0.516048	8.5334	1.42e-17	7.27e-17
SLC9A2	138.481	2.32174	0.307293	7.55547	4.17e-14	1.69e-13
MFSD9	827.486	1.01119	0.0746702	13.5421	8.83e-42	1.72e-40
TMEM182	384.715	1.55157	0.0947187	16.3808	2.62e-60	1.17e-58
POU3F3	3.37731	1.94618	0.561973	3.46313	0.000533935	0.000943592
FHL2	2861.89	2.3327	0.158182	14.747	3.22e-49	9.02e-48
C2orf40	160.38	-2.52026	0.276561	-9.11285	8.02e-20	4.73e-19
SLC5A7	25.7712	-1.36852	0.400659	-3.41568	0.00063623	0.0011157
SULT1C3	1.34271	2.48964	0.760596	3.27327	0.00106312	0.00182165
SULT1C2	948.217	1.69875	0.234096	7.25664	3.97e-13	1.52e-12
SULT1C4	143.727	-2.2771	0.16525	-13.7797	3.38e-43	7.07e-42
BUB1	1074.67	2.64673	0.15297	17.3023	4.52e-67	2.7e-65
ACOXL	315.755	-1.87752	0.198261	-9.46995	2.8e-21	1.81e-20
NT5DC4	17.9364	1.89364	0.23759	7.97019	1.58e-15	7.15e-15
CKAP2L	468.888	3.15072	0.160309	19.654	5.34e-86	6.96e-84
IL1A	101.402	-1.35333	0.258988	-5.22546	1.74e-07	4.26e-07
IL1B	448.407	-1.06781	0.179551	-5.94711	2.73e-09	7.77e-09
IL37	400.842	6.25023	0.400265	15.6152	5.73e-55	2.08e-53
IL36G	28.602	4.40955	0.358381	12.3041	8.61e-35	1.18e-33
IL36A	0.796284	1.64532	0.531793	3.0939	0.00197541	0.00327797
IL36RN	136.568	6.21758	0.402512	15.4469	7.91e-54	2.76e-52
DPP10	183.867	2.45178	0.311493	7.87106	3.52e-15	1.54e-14
EN1	2.97143	1.70469	0.406516	4.19343	2.75e-05	5.55e-05
MARCO	4717.26	-3.02397	0.224895	-13.4461	3.24e-41	6.13e-40
C1QL2	74.7916	4.2947	0.451967	9.50225	2.05e-21	1.34e-20
TMEM177	507.234	1.58177	0.0798297	19.8143	2.24e-87	3.2e-85
INHBB	1374.29	1.06414	0.200437	5.30911	1.1e-07	2.74e-07
CNTNAP5	3.51508	3.36007	0.648673	5.17992	2.22e-07	5.38e-07
GYPC	1088.98	-1.75392	0.113095	-15.5084	3.04e-54	1.08e-52
CYP27C1	164.353	3.02461	0.242444	12.4755	1.02e-35	1.46e-34
PROC	197.521	3.93048	0.25938	15.1534	7.2e-52	2.3e-50
MYO7B	151.11	-1.66903	0.230825	-7.23072	4.8e-13	1.82e-12
LIMS2	1231.49	-2.78593	0.127743	-21.8089	1.91e-105	8.68e-103
GPR17	39.2376	-1.9971	0.216353	-9.23074	2.69e-20	1.63e-19
POTEF	7.3162	1.13391	0.263292	4.30668	1.66e-05	3.42e-05
CCDC74B	80.1552	-1.23097	0.215126	-5.72209	1.05e-08	2.85e-08
TUBA3E	2.23559	1.42868	0.378601	3.77357	0.000160928	0.000300592
CFC1	0.412139	-1.87509	0.658987	-2.84541	0.00443541	0.00705702
AMER3	2.8998	1.44606	0.50869	2.8427	0.00447326	0.00711319
MZT2A	1180.45	1.18115	0.10366	11.3945	4.46e-30	4.77e-29
TUBA3D	14.9504	1.15512	0.15653	7.37953	1.59e-13	6.23e-13
ANKRD30BL	1.47141	2.27741	0.58738	3.87723	0.000105652	0.000201031
LYPD1	250.298	4.06797	0.230262	17.6667	7.56e-70	5.15e-68
NCKAP5	553.542	-3.50413	0.21999	-15.9286	4.01e-57	1.57e-55
ACMSD	64.2929	2.84804	0.281995	10.0996	5.55e-24	4.25e-23
MAP3K19	119.592	-1.61563	0.290444	-5.56262	2.66e-08	6.97e-08
LCT	62.7106	4.03341	0.356577	11.3115	1.15e-29	1.2e-28
MCM6	2452.36	1.46003	0.105734	13.8085	2.26e-43	4.78e-42
LRP1B	28.4681	1.43157	0.36331	3.94035	8.14e-05	0.000156997
KYNU	1993.78	1.19899	0.248464	4.82562	1.4e-06	3.16e-06
ZEB2	2654.71	-1.32334	0.132163	-10.0129	1.34e-23	1e-22
KIF5C	159.882	1.27755	0.223654	5.71219	1.12e-08	3.01e-08
LYPD6B	319.392	2.05815	0.272194	7.56134	3.99e-14	1.62e-13
NEB	342.796	2.04949	0.236565	8.66354	4.57e-18	2.42e-17
CACNB4	197.403	-1.54985	0.203412	-7.61927	2.55e-14	1.05e-13
GALNT13	202.886	-1.59129	0.271117	-5.8694	4.37e-09	1.22e-08
CD302	878.208	-1.34629	0.13824	-9.73875	2.06e-22	1.43e-21
TBR1	6.77681	2.92387	0.446396	6.54995	5.76e-11	1.86e-10
DPP4	6157.09	1.25739	0.20719	6.06878	1.29e-09	3.77e-09
GCG	4.13631	3.43682	0.761597	4.51264	6.4e-06	1.37e-05
FAP	1010.07	2.25815	0.162564	13.8909	7.19e-44	1.56e-42
GRB14	430.341	1.58792	0.199423	7.96259	1.68e-15	7.58e-15
SLC38A11	46.4148	1.84247	0.240359	7.6655	1.78e-14	7.41e-14
SCN3A	122.248	1.42346	0.302041	4.71281	2.44e-06	5.41e-06
SCN1A	188.816	-1.8842	0.256466	-7.34679	2.03e-13	7.91e-13
SCN7A	1140.33	-2.36498	0.198951	-11.8873	1.38e-32	1.68e-31
XIRP2	4.01646	-1.96174	0.351968	-5.57365	2.49e-08	6.55e-08
STK39	2871.36	1.5382	0.108975	14.1152	3.06e-45	7.16e-44
NOSTRIN	753.167	-1.48628	0.151589	-9.80464	1.08e-22	7.62e-22
SPC25	216.611	2.37609	0.151295	15.705	1.4e-55	5.17e-54
G6PC2	1.67609	-2.45353	0.359662	-6.82177	8.99e-12	3.11e-11
ABCB11	8.47304	1.48708	0.308157	4.82573	1.39e-06	3.16e-06
KLHL41	27.8014	-1.31818	0.178931	-7.36699	1.75e-13	6.83e-13
CCDC173	88.2561	-2.06502	0.208532	-9.90265	4.05e-23	2.95e-22
KLHL23	1185.13	1.14996	0.114798	10.0173	1.28e-23	9.59e-23
MYO3B	138.531	3.50769	0.274132	12.7957	1.73e-37	2.7e-36
SP5	255.92	2.34332	0.242792	9.65154	4.84e-22	3.28e-21
ERICH2	139.793	-1.11129	0.169337	-6.56262	5.29e-11	1.72e-10
GAD1	170.713	3.80438	0.251536	15.1246	1.11e-51	3.52e-50
CYBRD1	7930.19	-1.76157	0.144924	-12.1551	5.39e-34	7.08e-33
DLX1	5.83118	2.83569	0.366257	7.74233	9.76e-15	4.15e-14
DLX2	3.97909	2.94316	0.448245	6.56597	5.17e-11	1.68e-10
PDK1	1492.1	1.71728	0.118364	14.5084	1.07e-47	2.82e-46
RAPGEF4	312.41	-1.81206	0.130276	-13.9094	5.56e-44	1.21e-42
CDCA7	1183.41	2.93262	0.176621	16.604	6.52e-62	3.13e-60
SP9	6.94676	4.79138	0.684434	7.00049	2.55e-12	9.16e-12
CHRNA1	91.7849	1.26259	0.242998	5.19587	2.04e-07	4.95e-07
EVX2	1.3795	2.60097	0.653969	3.97721	6.97e-05	0.00013538
HOXD13	15.5266	5.84461	0.73208	7.98357	1.42e-15	6.43e-15
HOXD12	1.65205	2.9248	0.564426	5.1819	2.2e-07	5.32e-07
HOXD11	9.94774	5.21145	0.657128	7.93065	2.18e-15	9.73e-15
HOXD10	36.2042	1.45289	0.343177	4.23365	2.3e-05	4.68e-05
HOXD4	20.9307	2.86461	0.323933	8.84321	9.3e-19	5.12e-18
HOXD1	199.45	1.4482	0.266423	5.43571	5.46e-08	1.4e-07
PDE11A	44.775	1.65589	0.241874	6.84608	7.59e-12	2.64e-11
OSBPL6	395.517	-1.52683	0.175936	-8.67835	4.02e-18	2.13e-17
CCDC141	136.771	-2.97351	0.231803	-12.8278	1.15e-37	1.8e-36
ZNF385B	923.903	-1.67575	0.26559	-6.30954	2.8e-10	8.6e-10
NEUROD1	41.2448	4.75995	0.698238	6.81709	9.29e-12	3.21e-11
SSFA2	6204.71	-1.15572	0.0950577	-12.1581	5.2e-34	6.83e-33
FSIP2	147.312	2.80359	0.27314	10.2643	1.02e-24	8.17e-24
CALCRL	2366.04	-2.76013	0.133937	-20.6077	2.34e-94	5.09e-92
DIRC1	2.05189	2.60638	0.389133	6.69793	2.11e-11	7.1e-11
COL3A1	96467.2	2.51049	0.1784	14.0722	5.63e-45	1.3e-43
COL5A2	9252.62	2.16286	0.165249	13.0885	3.83e-39	6.51e-38
CAVIN2	3624.79	-3.29666	0.166485	-19.8015	2.89e-87	4.03e-85
HECW2	1235.54	-1.32227	0.124099	-10.6549	1.65e-26	1.46e-25
CCDC150	113.33	2.6326	0.166517	15.8098	2.66e-56	1.01e-54
HSPD1	15027.2	1.29932	0.0944306	13.7596	4.46e-43	9.28e-42
HSPE1	3956.52	1.29164	0.0998877	12.9309	3.01e-38	4.88e-37
HSPE1-MOB4	2.55797	1.14004	0.239831	4.75351	2e-06	4.46e-06
BOLL	5.21182	2.86485	0.416986	6.87038	6.4e-12	2.24e-11
PLCL1	252.459	-1.7437	0.120257	-14.4998	1.22e-47	3.19e-46
SATB2	324.784	1.30473	0.144187	9.0489	1.44e-19	8.37e-19
SGO2	469.905	1.58131	0.125706	12.5794	2.74e-36	4.06e-35
AOX1	615.725	-1.19241	0.216799	-5.50007	3.8e-08	9.86e-08
ALS2CR12	45.297	-1.40857	0.211821	-6.6498	2.93e-11	9.73e-11
C2CD6	130.373	2.26486	0.214383	10.5645	4.35e-26	3.73e-25
CDK15	39.8888	-1.20553	0.171149	-7.04379	1.87e-12	6.8e-12
KIAA2012	56.632	-1.31885	0.320677	-4.11271	3.91e-05	7.78e-05
BMPR2	5732.05	-1.33178	0.0826095	-16.1214	1.8e-58	7.51e-57
WDR12	1314.94	1.01036	0.0772987	13.0709	4.83e-39	8.17e-38
CTLA4	192.844	1.02628	0.160914	6.3778	1.8e-10	5.61e-10
PARD3B	853.218	-1.13212	0.11524	-9.824	8.88e-23	6.31e-22
MDH1B	98.4686	-1.39142	0.215053	-6.47013	9.79e-11	3.13e-10
PTH2R	28.2838	1.56092	0.295593	5.28064	1.29e-07	3.19e-07
ACADL	291.031	-3.11817	0.236285	-13.1967	9.17e-40	1.6e-38
MYL1	1.07956	-1.49826	0.696774	-2.15028	0.0315331	0.0448954
CPS1	10612.2	6.6499	0.424998	15.6469	3.49e-55	1.27e-53
ERBB4	225.953	-1.72449	0.246983	-6.98223	2.91e-12	1.04e-11
BARD1	637.921	1.14279	0.0978684	11.6768	1.67e-31	1.93e-30
ABCA12	579.622	5.36126	0.244014	21.9711	5.44e-107	2.66e-104
ATIC	4444.18	1.23	0.0731065	16.8248	1.61e-63	8.27e-62
IGFBP2	8965.37	1.53223	0.233209	6.57019	5.02e-11	1.64e-10
TNS1	15580.7	-2.16257	0.121464	-17.8043	6.55e-71	4.62e-69
RUFY4	75.4835	2.28964	0.224575	10.1954	2.08e-24	1.64e-23
CXCR2	121.787	-2.61277	0.184051	-14.1959	9.71e-46	2.31e-44
CXCR1	71.2202	-2.8853	0.223064	-12.9348	2.86e-38	4.65e-37
GPBAR1	60.7593	-1.85412	0.144715	-12.8122	1.4e-37	2.19e-36
CATIP	86.4027	-1.50035	0.211711	-7.08675	1.37e-12	5.04e-12
SLC11A1	1965.18	-1.81496	0.149389	-12.1492	5.79e-34	7.6e-33
VIL1	1174.25	6.98455	0.383435	18.2157	3.87e-74	2.97e-72
CYP27A1	3847.58	-1.71517	0.148589	-11.5431	8e-31	8.93e-30
WNT6	12.3993	1.86813	0.244859	7.6294	2.36e-14	9.74e-14
WNT10A	271.465	1.74274	0.225768	7.71916	1.17e-14	4.94e-14
CDK5R2	32.1316	3.29668	0.346091	9.52546	1.64e-21	1.08e-20
CRYBA2	7.81938	4.29407	0.457117	9.39383	5.79e-21	3.67e-20
CFAP65	234.774	-1.93117	0.283574	-6.81011	9.75e-12	3.36e-11
IHH	100.741	-1.39213	0.341271	-4.07924	4.52e-05	8.94e-05
AC068946.1	24.9101	1.70653	0.184086	9.27027	1.86e-20	1.14e-19
SLC23A3	62.4417	1.64217	0.168435	9.74958	1.85e-22	1.29e-21
ABCB6	438.68	2.02571	0.145784	13.8953	6.77e-44	1.47e-42
TUBA4A	4331.18	1.03892	0.125227	8.2963	1.07e-16	5.21e-16
TUBA4B	131.657	-2.17481	0.295863	-7.35073	1.97e-13	7.68e-13
PTPRN	114.608	3.58797	0.313364	11.4499	2.36e-30	2.56e-29
DES	928.454	-3.02912	0.225131	-13.4549	2.88e-41	5.46e-40
GMPPA	2456.64	1.02565	0.0714336	14.3581	9.48e-47	2.36e-45
CHPF	7027.7	1.25338	0.114806	10.9174	9.52e-28	8.97e-27
INHA	396.405	5.91543	0.377583	15.6666	2.56e-55	9.39e-54
SLC4A3	361.972	1.81797	0.181344	10.025	1.18e-23	8.9e-23
PAX3	3.54922	2.34824	0.528904	4.43982	9e-06	1.9e-05
SGPP2	3687.33	1.30182	0.151585	8.58807	8.84e-18	4.59e-17
MOGAT1	3.86335	-2.60271	0.267816	-9.71829	2.52e-22	1.74e-21
KCNE4	1052.39	2.30705	0.239715	9.62412	6.32e-22	4.26e-21
SCG2	246.226	1.47472	0.263214	5.60274	2.11e-08	5.58e-08
SERPINE2	1361.98	1.20499	0.166909	7.21945	5.22e-13	1.97e-12
FAM124B	96.5664	-1.84758	0.133081	-13.8831	8.02e-44	1.73e-42
COL4A4	1675.66	-1.17896	0.167879	-7.02265	2.18e-12	7.85e-12
COL4A3	1379.29	-1.40951	0.207234	-6.80158	1.03e-11	3.56e-11
TM4SF20	12.9466	3.09879	0.490815	6.31355	2.73e-10	8.39e-10
SLC19A3	298.01	-2.87971	0.201888	-14.2639	3.67e-46	8.88e-45
CCL20	1705.3	1.29931	0.268692	4.83568	1.33e-06	3.01e-06
DAW1	162.823	-1.07645	0.257415	-4.18176	2.89e-05	5.83e-05
SPHKAP	8.16645	-1.91612	0.448031	-4.27676	1.9e-05	3.89e-05
PID1	932.906	-1.93411	0.158967	-12.1667	4.68e-34	6.16e-33
SLC16A14	1662.09	2.93254	0.248678	11.7925	4.27e-32	5.1e-31
ITM2C	6681.42	1.20907	0.117244	10.3124	6.19e-25	5.01e-24
C2orf72	247.882	1.92543	0.275246	6.99529	2.65e-12	9.5e-12
HTR2B	154.847	1.80257	0.251139	7.1776	7.09e-13	2.66e-12
NMUR1	78.621	-2.66495	0.155515	-17.1364	7.95e-66	4.56e-64
NPPC	6.25951	1.42259	0.312927	4.54608	5.47e-06	1.17e-05
ALPP	173.555	-1.32659	0.330386	-4.01528	5.94e-05	0.000116212
ALPI	1.44443	2.52578	0.782249	3.22888	0.00124278	0.00211228
ECEL1	170.662	4.58985	0.31259	14.6833	8.25e-49	2.26e-47
PRSS56	2.79665	3.27637	0.545008	6.01159	1.84e-09	5.31e-09
CHRND	4.18666	2.63095	0.42038	6.2585	3.89e-10	1.18e-09
CHRNG	6.29856	1.75551	0.275825	6.36461	1.96e-10	6.1e-10
C2orf82	77.9738	2.50798	0.170175	14.7377	3.69e-49	1.03e-47
NGEF	473.477	2.98527	0.216704	13.7758	3.56e-43	7.46e-42
UGT1A8	3.64973	3.96429	0.745867	5.31501	1.07e-07	2.66e-07
UGT1A10	26.2275	6.25255	0.736291	8.49196	2.03e-17	1.03e-16
UGT1A7	4.77434	3.52537	0.563242	6.25907	3.87e-10	1.18e-09
UGT1A6	434.423	4.58578	0.461923	9.9276	3.16e-23	2.31e-22
UGT1A3	2.91245	3.68395	0.706027	5.21786	1.81e-07	4.42e-07
UGT1A1	7.58802	3.75623	0.585885	6.4112	1.44e-10	4.54e-10
MROH2A	51.0007	2.27839	0.360699	6.31661	2.67e-10	8.24e-10
HJURP	692.098	3.86144	0.173253	22.2879	4.84e-110	3.05e-107
TRPM8	328.641	6.63742	0.349003	19.0182	1.21e-80	1.2e-78
SPP2	35.9592	6.77309	0.442862	15.2939	8.4e-53	2.79e-51
GBX2	8.56768	2.64086	0.400121	6.60017	4.11e-11	1.35e-10
IQCA1	342.234	-1.0993	0.202834	-5.41969	5.97e-08	1.53e-07
COL6A3	32753.2	1.21686	0.147197	8.2669	1.37e-16	6.61e-16
PRLH	1.1062	-2.0438	0.384857	-5.31056	1.09e-07	2.72e-07
RAMP1	1583.49	2.22714	0.189219	11.7702	5.56e-32	6.59e-31
ESPNL	81.994	1.1874	0.224647	5.28563	1.25e-07	3.11e-07
ERFE	240.873	3.27315	0.245046	13.3573	1.07e-40	1.99e-39
HES6	1059.24	2.8532	0.222445	12.8266	1.16e-37	1.83e-36
TWIST2	125.915	-1.02397	0.167496	-6.11342	9.75e-10	2.88e-09
OTOS	2.58839	3.36628	0.683576	4.92452	8.46e-07	1.95e-06
GPR35	431.624	2.48238	0.217136	11.4324	2.88e-30	3.11e-29
AQP12B	0.881134	1.92419	0.773405	2.48794	0.0128485	0.0192935
KIF1A	1604.36	5.46601	0.412258	13.2587	4.02e-40	7.15e-39
CROCC2	81.2372	-1.03842	0.286634	-3.62282	0.000291404	0.000530124
ANO7	151.288	1.88669	0.134677	14.009	1.37e-44	3.09e-43
DTYMK	1447.29	1.29322	0.104549	12.3695	3.82e-35	5.34e-34
GAL3ST2	19.7779	2.33845	0.335191	6.97649	3.03e-12	1.08e-11
AC131097.2	5.15116	1.77946	0.302058	5.89113	3.84e-09	1.08e-08
CHL1	1651.71	1.54869	0.226323	6.84286	7.76e-12	2.7e-11
CNTN6	154.886	-3.44587	0.269139	-12.8033	1.57e-37	2.45e-36
IL5RA	138.716	-2.11113	0.237575	-8.88616	6.33e-19	3.53e-18
LRRN1	572.306	1.43535	0.240605	5.96561	2.44e-09	6.97e-09
LMCD1	1926.23	-1.73551	0.102754	-16.8899	5.34e-64	2.78e-62
CAV3	7.81728	-3.03666	0.288095	-10.5405	5.62e-26	4.8e-25
LHFPL4	123.032	3.4827	0.396302	8.788	1.52e-18	8.32e-18
CIDEC	20.8077	2.54704	0.394274	6.46008	1.05e-10	3.33e-10
FANCD2	708.765	1.53818	0.0991236	15.5178	2.63e-54	9.33e-53
FANCD2OS	3.32978	2.4231	0.31324	7.73561	1.03e-14	4.37e-14
SLC6A11	86.2784	3.73344	0.36578	10.2068	1.85e-24	1.46e-23
SYN2	50.9252	-2.29123	0.243704	-9.40172	5.37e-21	3.41e-20
PPARG	1003.59	-1.59164	0.173508	-9.17335	4.59e-20	2.74e-19
MKRN2OS	96.1025	1.53393	0.164231	9.34004	9.63e-21	6.02e-20
TMEM40	94.614	1.34492	0.236211	5.69374	1.24e-08	3.34e-08
NUP210	4470.43	1.10034	0.1177	9.34872	8.87e-21	5.56e-20
WNT7A	201.86	-2.23637	0.311723	-7.17422	7.27e-13	2.72e-12
FGD5	1337.59	-2.2543	0.110984	-20.3118	1.01e-91	1.92e-89
SH3BP5	675.078	-1.40889	0.119899	-11.7506	7.01e-32	8.25e-31
DAZL	4.3965	1.70279	0.340206	5.00517	5.58e-07	1.31e-06
KCNH8	64.4387	1.97779	0.27313	7.24121	4.45e-13	1.69e-12
EFHB	109.129	-1.67752	0.222955	-7.52405	5.31e-14	2.14e-13
KAT2B	1195.19	-1.13022	0.0993893	-11.3716	5.79e-30	6.18e-29
SGO1	203.487	3.22548	0.162008	19.9094	3.38e-88	5.12e-86
THRB	523.472	-1.0899	0.152881	-7.12909	1.01e-12	3.74e-12
NEK10	123.716	-1.25772	0.2305	-5.45649	4.86e-08	1.25e-07
RBMS3	1003.03	-1.50422	0.152028	-9.89434	4.41e-23	3.19e-22
TGFBR2	10269.8	-1.66872	0.104712	-15.9363	3.55e-57	1.4e-55
TRIM71	73.4048	-1.99202	0.296452	-6.71954	1.82e-11	6.15e-11
STAC	458.394	-2.07666	0.195268	-10.6349	2.05e-26	1.8e-25
CTDSPL	2791.21	-1.03569	0.0906449	-11.4258	3.11e-30	3.36e-29
DLEC1	335.841	-1.04983	0.240574	-4.36387	1.28e-05	2.66e-05
SLC22A14	5.75646	1.22599	0.255584	4.79684	1.61e-06	3.63e-06
XYLB	266.42	1.58616	0.107737	14.7226	4.62e-49	1.28e-47
SCN5A	30.9176	1.43971	0.238185	6.04452	1.5e-09	4.36e-09
SCN11A	15.25	-1.07265	0.172504	-6.21811	5.03e-10	1.52e-09
CSRNP1	3321.12	-2.37892	0.124884	-19.049	6.7e-81	6.82e-79
CX3CR1	282.722	-1.56809	0.196289	-7.98869	1.36e-15	6.18e-15
CCR8	36.0049	1.61206	0.172633	9.33808	9.81e-21	6.13e-20
MOBP	16.1043	-1.38638	0.235109	-5.89678	3.71e-09	1.04e-08
MYRIP	146.97	-1.18927	0.209948	-5.66459	1.47e-08	3.94e-08
LYZL4	1.35827	1.83053	0.384047	4.76641	1.88e-06	4.19e-06
VIPR1	1390.98	-3.21417	0.174804	-18.3873	1.66e-75	1.35e-73
ZBTB47	712.925	-1.08586	0.085739	-12.6647	9.28e-37	1.41e-35
CCDC13	62.9102	-1.38394	0.175701	-7.87671	3.36e-15	1.48e-14
ACKR2	292.249	1.38537	0.242996	5.7012	1.19e-08	3.21e-08
CYP8B1	22.269	1.27197	0.272696	4.66442	3.09e-06	6.79e-06
SNRK	1974.84	-1.19519	0.0712834	-16.7667	4.28e-63	2.15e-61
LINC00694	17.6122	-1.78803	0.233213	-7.66695	1.76e-14	7.33e-14
KIF15	361.269	2.68155	0.149383	17.9509	4.72e-72	3.43e-70
CLEC3B	949.01	-3.6739	0.197016	-18.6477	1.32e-77	1.18e-75
TMEM158	186.528	1.4636	0.196068	7.46474	8.35e-14	3.33e-13
LIMD1	3341.56	-1.12815	0.0991314	-11.3803	5.24e-30	5.6e-29
CCR3	45.3042	1.39749	0.203425	6.86983	6.43e-12	2.25e-11
CCRL2	435.319	-1.54806	0.139095	-11.1295	9.01e-29	9e-28
LTF	5598.49	1.29142	0.281795	4.58282	4.59e-06	9.94e-06
LRRC2	68.4392	-2.43698	0.175718	-13.8687	9.8e-44	2.12e-42
TMIE	43.7915	-1.00332	0.17037	-5.88909	3.88e-09	1.09e-08
PRSS50	85.2149	3.31811	0.257922	12.8648	7.1e-38	1.13e-36
PRSS46	11.9393	2.64465	0.289228	9.14382	6.03e-20	3.57e-19
PRSS45	57.08	1.65544	0.212564	7.78795	6.81e-15	2.93e-14
PRSS42	5.1161	1.60764	0.25926	6.20086	5.62e-10	1.69e-09
MYL3	23.1528	-1.71884	0.157676	-10.9011	1.14e-27	1.07e-26
PTH1R	147.312	-1.89161	0.15668	-12.0731	1.47e-33	1.89e-32
CDC25A	239.42	2.34956	0.151585	15.5	3.47e-54	1.22e-52
CAMP	38.9265	-2.63254	0.247907	-10.6191	2.43e-26	2.12e-25
SPINK8	1.19902	1.65077	0.495523	3.33137	0.000864207	0.00149611
UCN2	20.3732	3.99814	0.342243	11.6822	1.57e-31	1.81e-30
COL7A1	1261.91	3.15663	0.237207	13.3075	2.09e-40	3.79e-39
TMEM89	3.15651	1.36378	0.288301	4.73042	2.24e-06	4.98e-06
SLC26A6	939.65	1.38471	0.117937	11.7412	7.84e-32	9.2e-31
CELSR3	790.469	3.38974	0.176148	19.2437	1.59e-82	1.76e-80
LAMB2	9089.24	-1.01751	0.0896438	-11.3506	7.37e-30	7.78e-29
MST1	287.448	1.3183	0.157147	8.38896	4.9e-17	2.42e-16
AMIGO3	1.74137	1.04451	0.27054	3.86083	0.000113005	0.000214459
CDHR4	196.321	-1.61414	0.320786	-5.03183	4.86e-07	1.14e-06
FAM212A	91.7549	-1.46723	0.124977	-11.74	7.95e-32	9.31e-31
TRAIP	230.838	1.81837	0.11154	16.3024	9.48e-60	4.13e-58
CAMKV	3.51869	1.52883	0.340156	4.49451	6.97e-06	1.49e-05
MST1R	2084.71	1.05919	0.130769	8.09975	5.51e-16	2.55e-15
GNAT1	1.91808	1.22629	0.491987	2.49253	0.0126838	0.0190564
SLC38A3	57.7882	2.42679	0.295454	8.21377	2.14e-16	1.02e-15
SEMA3B	2179.86	-1.53532	0.197533	-7.77246	7.7e-15	3.3e-14
LSMEM2	4.02455	-1.26336	0.211807	-5.9647	2.45e-09	7e-09
HYAL1	1118.72	-1.89673	0.202009	-9.38931	6.04e-21	3.83e-20
HYAL2	3776.3	-1.28021	0.0836762	-15.2996	7.69e-53	2.56e-51
ZMYND10	558.947	-1.94138	0.245969	-7.89279	2.96e-15	1.31e-14
CACNA2D2	4188.66	-2.37363	0.249474	-9.51453	1.83e-21	1.19e-20
DOCK3	203.605	1.66094	0.204521	8.12115	4.62e-16	2.15e-15
MANF	3868.55	1.38446	0.0926101	14.9494	1.57e-50	4.71e-49
IQCF6	0.748256	1.22391	0.436249	2.80553	0.00502332	0.00793111
ABHD14A-ACY1	12.0323	1.03689	0.149948	6.91497	4.68e-12	1.65e-11
ACY1	231.106	1.01243	0.1028	9.84858	6.95e-23	4.97e-22
POC1A	429.956	1.57489	0.11611	13.5637	6.57e-42	1.29e-40
SEMA3G	725.286	-3.20781	0.138575	-23.1486	1.5e-118	1.63e-115
TNNC1	655.425	-3.5481	0.203035	-17.4753	2.21e-68	1.41e-66
GNL3	3772.23	1.10004	0.0764871	14.382	6.71e-47	1.68e-45
ITIH3	86.7918	-1.45932	0.145691	-10.0165	1.29e-23	9.66e-23
IL17RD	363.262	1.25269	0.167097	7.49679	6.54e-14	2.63e-13
DNAH12	235.493	-1.52229	0.288654	-5.27373	1.34e-07	3.31e-07
DNASE1L3	236.181	-3.47151	0.226632	-15.3178	5.82e-53	1.95e-51
ABHD6	415.672	-1.27882	0.0885241	-14.446	2.66e-47	6.8e-46
FAM107A	1745.97	-4.52771	0.201936	-22.4215	2.43e-111	1.7e-108
C3orf67	165.51	1.45852	0.157814	9.24204	2.42e-20	1.47e-19
SYNPR	4.49323	3.50872	0.442793	7.92405	2.3e-15	1.02e-14
SNTN	318.01	-2.20455	0.294779	-7.47866	7.51e-14	3.01e-13
PRICKLE2	813.771	-1.42129	0.113495	-12.5229	5.6e-36	8.14e-35
MAGI1	1459.17	-1.06933	0.10995	-9.72552	2.35e-22	1.62e-21
LMOD3	20.6368	-1.46052	0.133804	-10.9154	9.73e-28	9.16e-27
FRMD4B	1652.02	-1.10377	0.0955082	-11.5568	6.82e-31	7.64e-30
MITF	783.144	-1.18735	0.116098	-10.2271	1.5e-24	1.19e-23
EIF4E3	1508.33	-1.09454	0.0988684	-11.0707	1.74e-28	1.71e-27
PROK2	17.8814	-2.05906	0.237101	-8.68433	3.81e-18	2.02e-17
PDZRN3	535.495	-1.10907	0.133289	-8.32078	8.74e-17	4.26e-16
FRG2C	1.95494	1.75775	0.42385	4.1471	3.37e-05	6.74e-05
ROBO2	468.767	-1.55565	0.21944	-7.08918	1.35e-12	4.95e-12
VGLL3	1352.17	-1.22122	0.181206	-6.73944	1.59e-11	5.39e-11
POU1F1	3.46243	-1.24985	0.206279	-6.059	1.37e-09	3.99e-09
PROS1	2494.28	-1.51647	0.127568	-11.8876	1.37e-32	1.68e-31
ARL13B	638.31	-1.07978	0.0756696	-14.2697	3.38e-46	8.22e-45
EPHA6	24.6274	2.21544	0.333191	6.64915	2.95e-11	9.77e-11
GABRR3	2.14848	2.54392	0.480024	5.29956	1.16e-07	2.89e-07
OR5K2	2.42889	-1.2965	0.211696	-6.12435	9.11e-10	2.7e-09
DCBLD2	6265.45	1.0965	0.178913	6.12867	8.86e-10	2.63e-09
ADGRG7	10.1475	4.8833	0.593337	8.23023	1.87e-16	8.91e-16
ABI3BP	1955.84	-2.46728	0.17101	-14.4277	3.47e-47	8.81e-46
NFKBIZ	2910.43	-1.08313	0.146457	-7.39556	1.41e-13	5.54e-13
ZPLD1	31.5088	4.32923	0.319254	13.5604	6.87e-42	1.35e-40
CCDC54	2.94365	-2.13863	0.196707	-10.8721	1.57e-27	1.46e-26
HHLA2	1427.07	2.26096	0.372204	6.07451	1.24e-09	3.64e-09
KIAA1524	427.35	1.9637	0.147943	13.2733	3.31e-40	5.91e-39
RETNLB	4.46684	3.90623	0.498361	7.83814	4.57e-15	1.99e-14
DPPA2	2.96407	3.76067	1.29855	2.89606	0.00377882	0.00606466
ZBED2	301.99	-2.36554	0.185915	-12.7238	4.36e-37	6.7e-36
PLCXD2	45.0663	-1.78016	0.167893	-10.6029	2.89e-26	2.5e-25
PHLDB2	1536.62	-1.42432	0.155129	-9.18151	4.25e-20	2.55e-19
ZNF80	11.7081	1.15453	0.228678	5.04873	4.45e-07	1.05e-06
TIGIT	418.393	1.1769	0.155434	7.57171	3.68e-14	1.5e-13
GAP43	34.3032	2.30973	0.294381	7.84608	4.29e-15	1.87e-14
LSAMP	714.226	-1.40965	0.157367	-8.95773	3.31e-19	1.88e-18
IGSF11	35.4046	1.63775	0.254797	6.42768	1.3e-10	4.09e-10
C3orf30	9.11358	3.86825	0.429262	9.01141	2.03e-19	1.17e-18
UPK1B	223.094	3.06073	0.470996	6.49842	8.12e-11	2.6e-10
B4GALT4	1540.31	1.0256	0.106782	9.60458	7.65e-22	5.12e-21
ARHGAP31	2428.59	-2.13747	0.124296	-17.1966	2.82e-66	1.63e-64
ADPRH	862.667	-1.5999	0.0899247	-17.7916	8.21e-71	5.76e-69
MAATS1	256.347	-1.26418	0.228264	-5.53824	3.06e-08	7.97e-08
NR1I2	33.5023	1.84833	0.27042	6.83504	8.2e-12	2.84e-11
HGD	1079.98	3.80585	0.288017	13.214	7.29e-40	1.28e-38
STXBP5L	18.7235	3.94207	0.438744	8.9849	2.59e-19	1.48e-18
POLQ	288.675	3.30454	0.172105	19.2007	3.65e-82	3.95e-80
SLC15A2	1473.9	-1.60169	0.163839	-9.77603	1.43e-22	1e-21
CASR	36.3601	1.52985	0.394388	3.87904	0.00010487	0.000199661
CSTA	481.762	-1.0069	0.189259	-5.32024	1.04e-07	2.59e-07
CCDC58	616.698	1.01449	0.0932809	10.8757	1.51e-27	1.41e-26
MYLK	5487.02	-1.24672	0.127376	-9.78771	1.27e-22	8.96e-22
MUC13	2853.48	5.94817	0.384886	15.4544	7.05e-54	2.46e-52
HEG1	4800.24	-2.12652	0.123136	-17.2698	7.95e-67	4.72e-65
SLC12A8	1116.57	1.29926	0.118788	10.9377	7.61e-28	7.23e-27
ALG1L	295.594	3.28914	0.206969	15.8919	7.21e-57	2.8e-55
ALDH1L1	240.538	1.18908	0.260424	4.56596	4.97e-06	1.07e-05
KLF15	448.962	-1.39538	0.199542	-6.99291	2.69e-12	9.65e-12
CFAP100	96.6697	-1.3093	0.299752	-4.36793	1.25e-05	2.61e-05
MCM2	2428.15	2.00086	0.133379	15.0014	7.19e-51	2.2e-49
PODXL2	2256.34	3.24201	0.192661	16.8275	1.53e-63	7.91e-62
KBTBD12	182.363	2.04789	0.265868	7.70267	1.33e-14	5.6e-14
GATA2	748.832	-1.85524	0.136496	-13.5919	4.47e-42	8.86e-41
EFCC1	298.019	-2.56825	0.149025	-17.2337	1.48e-66	8.68e-65
GP9	5.07046	-3.11618	0.252822	-12.3256	6.59e-35	9.1e-34
EFCAB12	131.229	-1.53793	0.2166	-7.10032	1.24e-12	4.59e-12
ALG1L2	32.3544	2.04465	0.152506	13.407	5.5e-41	1.03e-39
COL6A5	286.848	-1.6252	0.210514	-7.72014	1.16e-14	4.91e-14
COL6A6	604.236	-2.8063	0.21806	-12.8694	6.69e-38	1.07e-36
MRPL3	4142.04	1.02624	0.073201	14.0195	1.18e-44	2.68e-43
CPNE4	173.376	2.71082	0.222687	12.1732	4.32e-34	5.7e-33
ACKR4	81.4861	-2.38931	0.196665	-12.1491	5.8e-34	7.61e-33
BFSP2	16.6472	1.97584	0.229265	8.61812	6.81e-18	3.56e-17
TF	785.997	3.31607	0.344841	9.61624	6.83e-22	4.59e-21
C3orf36	57.6908	-1.14008	0.185978	-6.13019	8.78e-10	2.6e-09
SLCO2A1	3902.28	-1.78059	0.15952	-11.1622	6.24e-29	6.27e-28
EPHB1	167.747	1.49765	0.22242	6.73344	1.66e-11	5.6e-11
IL20RB	429.207	3.83207	0.284593	13.4651	2.51e-41	4.76e-40
SOX14	35.3118	5.28124	0.704177	7.49987	6.39e-14	2.57e-13
CLDN18	9320.3	-3.58484	0.354824	-10.1032	5.35e-24	4.11e-23
NME9	71.4639	-1.08139	0.207788	-5.20432	1.95e-07	4.74e-07
MRAS	1119.41	-1.12403	0.0915337	-12.28	1.16e-34	1.58e-33
ESYT3	1035	-1.06812	0.179768	-5.94165	2.82e-09	8.03e-09
FOXL2	7.25993	4.05498	0.523411	7.74722	9.39e-15	4e-14
FOXL2NB	4.81071	3.93618	0.527057	7.46822	8.13e-14	3.25e-13
RBP2	36.4079	-2.82311	0.286437	-9.85596	6.46e-23	4.63e-22
CLSTN2	230.386	-1.14118	0.206204	-5.53423	3.13e-08	8.15e-08
PCOLCE2	476.684	-2.36683	0.221826	-10.6698	1.41e-26	1.25e-25
PLOD2	5451.81	2.01284	0.174684	11.5228	1.01e-30	1.12e-29
PLSCR4	1283.52	-1.42325	0.110989	-12.8233	1.21e-37	1.9e-36
PLSCR2	16.5866	1.81982	0.207599	8.76606	1.85e-18	1e-17
ZIC4	16.7854	4.74568	0.661529	7.17381	7.29e-13	2.73e-12
ZIC1	54.6806	4.51983	0.579005	7.8062	5.89e-15	2.55e-14
AGTR1	139.959	-1.79393	0.227315	-7.89184	2.98e-15	1.32e-14
CPA3	1457.15	-1.69689	0.200514	-8.46272	2.61e-17	1.31e-16
CP	16859.1	3.47362	0.220711	15.7383	8.26e-56	3.09e-54
TM4SF4	825.015	4.58309	0.396364	11.5628	6.36e-31	7.12e-30
WWTR1	4545.34	-1.02275	0.0944357	-10.8301	2.48e-27	2.28e-26
ANKUB1	51.8111	-1.40397	0.312054	-4.49914	6.82e-06	1.46e-05
PFN2	4374.62	1.45716	0.172048	8.46951	2.46e-17	1.24e-16
P2RY14	210.259	-1.45722	0.137878	-10.5689	4.15e-26	3.57e-25
GPR87	467.578	4.07568	0.321473	12.6782	7.81e-37	1.19e-35
P2RY12	81.3639	-1.13248	0.195032	-5.80665	6.37e-09	1.76e-08
IGSF10	533.949	-2.80494	0.213995	-13.1075	2.98e-39	5.09e-38
AADACL2	4.23608	-1.1661	0.512312	-2.27615	0.0228371	0.0331542
AADAC	275.874	-1.3823	0.314755	-4.39167	1.12e-05	2.36e-05
P2RY1	366.532	-1.7559	0.127713	-13.7488	5.18e-43	1.07e-41
ARHGEF26	1156.51	-2.65308	0.140424	-18.8934	1.29e-79	1.25e-77
MME	1283.94	-2.51016	0.219478	-11.437	2.73e-30	2.96e-29
KCNAB1	180.63	-1.6407	0.137944	-11.894	1.27e-32	1.56e-31
VEPH1	1076.06	-2.63316	0.210776	-12.4927	8.18e-36	1.17e-34
PTX3	163.986	-2.14138	0.213766	-10.0174	1.28e-23	9.58e-23
SHOX2	88.8603	3.18202	0.257613	12.3519	4.76e-35	6.61e-34
IQCJ	0.683691	1.49963	0.625784	2.3964	0.0165571	0.0244862
AC079594.2	0.777197	1.42425	0.357288	3.98627	6.71e-05	0.000130524
TRIM59	472.742	1.48785	0.108985	13.6519	1.97e-42	3.96e-41
ARL14	87.6602	4.15888	0.383981	10.8309	2.46e-27	2.26e-26
B3GALNT1	790.96	-1.30416	0.142218	-9.17012	4.73e-20	2.82e-19
SPTSSB	254.034	4.50913	0.343025	13.1452	1.81e-39	3.13e-38
BCHE	201.94	-2.44905	0.213496	-11.4712	1.84e-30	2.01e-29
ZBBX	129.715	-1.63641	0.32567	-5.02475	5.04e-07	1.18e-06
LRRIQ4	28.5852	2.10343	0.241297	8.71717	2.85e-18	1.53e-17
LRRC31	307.925	1.61237	0.285261	5.65225	1.58e-08	4.22e-08
SAMD7	0.779423	1.34062	0.486358	2.75645	0.00584325	0.0091481
CLDN11	295.46	-1.26015	0.204426	-6.1643	7.08e-10	2.12e-09
RPL22L1	1341.55	1.17738	0.134513	8.75293	2.08e-18	1.12e-17
SLC2A2	5.28176	4.01083	0.705258	5.68704	1.29e-08	3.47e-08
TMEM212	49.0724	-2.18017	0.366288	-5.95207	2.65e-09	7.55e-09
ECT2	2327.05	2.16253	0.130282	16.5988	7.11e-62	3.4e-60
SPATA16	0.863913	1.86428	0.690031	2.70173	0.00689801	0.0107102
NAALADL2	831.136	1.16688	0.15461	7.54727	4.44e-14	1.8e-13
KCNMB2	24.0065	-1.55293	0.234883	-6.61149	3.8e-11	1.25e-10
KCNMB3	131.711	1.75699	0.136652	12.8574	7.82e-38	1.24e-36
SOX2	975.938	1.60043	0.280015	5.7155	1.09e-08	2.96e-08
LAMP3	7863.92	-2.76613	0.184755	-14.9719	1.12e-50	3.4e-49
HTR3C	19.6416	-4.53268	0.366003	-12.3843	3.18e-35	4.45e-34
ALG3	2514.65	1.10979	0.0892302	12.4374	1.64e-35	2.32e-34
ECE2	575.798	2.09314	0.131852	15.875	9.44e-57	3.64e-55
CAMK2N2	33.7706	3.28676	0.276938	11.8682	1.73e-32	2.1e-31
CLCN2	380.902	1.37218	0.0990401	13.8548	1.19e-43	2.55e-42
POLR2H	2355.69	1.1792	0.0818286	14.4106	4.44e-47	1.12e-45
THPO	109.016	3.08742	0.273952	11.2699	1.85e-29	1.91e-28
CHRD	624.768	1.34263	0.198173	6.77504	1.24e-11	4.26e-11
EPHB3	1431.93	1.32898	0.150172	8.84968	8.78e-19	4.85e-18
ETV5	2667.92	-1.17198	0.116545	-10.056	8.64e-24	6.55e-23
AHSG	5.99477	3.77819	0.474138	7.96854	1.61e-15	7.23e-15
FETUB	3.90406	3.9097	0.462589	8.45178	2.87e-17	1.44e-16
HRG	4.56034	3.129	0.412538	7.58477	3.33e-14	1.36e-13
KNG1	20.7487	2.72372	0.425179	6.40605	1.49e-10	4.69e-10
RFC4	835.232	1.77989	0.121258	14.6785	8.85e-49	2.41e-47
RPL39L	685.673	2.3145	0.176577	13.1076	2.98e-39	5.09e-38
MASP1	193.663	-2.68772	0.189928	-14.1513	1.83e-45	4.31e-44
SST	122.154	6.29521	0.718466	8.76201	1.92e-18	1.04e-17
TPRG1	268.614	-1.38142	0.164182	-8.41397	3.96e-17	1.97e-16
TP63	697.006	1.02921	0.272349	3.77903	0.000157441	0.000294473
P3H2	1934.91	-1.90844	0.21344	-8.94132	3.85e-19	2.18e-18
OSTN	4.36062	-1.54638	0.364325	-4.24449	2.19e-05	4.46e-05
CCDC50	2727.94	-1.01342	0.0876372	-11.5638	6.29e-31	7.05e-30
HRASLS	74.8087	2.80269	0.239133	11.7202	1e-31	1.17e-30
ATP13A4	2146.52	-1.24204	0.236299	-5.25623	1.47e-07	3.62e-07
CPN2	4.99515	1.04086	0.274629	3.79007	0.000150605	0.000282048
LRRC15	1275.06	2.29706	0.235312	9.76174	1.64e-22	1.15e-21
FAM43A	433.615	-1.17341	0.136866	-8.57342	1e-17	5.19e-17
MUC20	2402.03	2.32941	0.19645	11.8575	1.97e-32	2.38e-31
MUC4	6302.97	2.46317	0.245221	10.0447	9.7e-24	7.32e-23
TFRC	8258.46	-1.04463	0.139785	-7.47312	7.83e-14	3.13e-13
ZDHHC19	14.7328	-1.82945	0.208002	-8.79538	1.43e-18	7.81e-18
SMCO1	1.068	1.14312	0.341553	3.34683	0.000817417	0.00141804
NRROS	456.615	-1.08307	0.120563	-8.98346	2.62e-19	1.5e-18
MELTF	1157.61	2.79674	0.207651	13.4685	2.4e-41	4.56e-40
BDH1	1041.37	1.32299	0.12013	11.013	3.31e-28	3.2e-27
ZNF732	21.4286	1.92314	0.273762	7.02486	2.14e-12	7.73e-12
CPLX1	228.093	1.11925	0.177379	6.30993	2.79e-10	8.58e-10
SLC26A1	214.354	1.07784	0.119161	9.04521	1.49e-19	8.65e-19
RNF212	539.957	1.72101	0.22044	7.80717	5.85e-15	2.53e-14
FAM53A	99.0406	1.33998	0.123873	10.8174	2.85e-27	2.61e-26
TACC3	2280.59	1.67101	0.118926	14.0508	7.62e-45	1.74e-43
C4orf48	178.062	1.62473	0.165752	9.80218	1.1e-22	7.8e-22
NAT8L	177.305	3.37342	0.269005	12.5404	4.49e-36	6.57e-35
HGFAC	30.1763	2.97382	0.287395	10.3475	4.29e-25	3.51e-24
DOK7	162.732	-1.11818	0.18996	-5.8864	3.95e-09	1.11e-08
MSX1	79.1732	-1.00267	0.164805	-6.08394	1.17e-09	3.44e-09
C4orf50	8.76645	1.47751	0.256038	5.77066	7.9e-09	2.16e-08
JAKMIP1	105.616	1.0927	0.181679	6.01444	1.81e-09	5.22e-09
WFS1	3461.56	-1.71722	0.102277	-16.7899	2.9e-63	1.47e-61
PPP2R2C	522.388	5.00609	0.33565	14.9146	2.65e-50	7.83e-49
S100P	10671.8	5.05841	0.317039	15.9552	2.62e-57	1.04e-55
CCDC96	192.304	-1.01426	0.152215	-6.66336	2.68e-11	8.92e-11
PSAPL1	28.4118	-1.03698	0.356877	-2.90572	0.00366408	0.00589261
HTRA3	3111	1.08344	0.168858	6.41628	1.4e-10	4.4e-10
GPR78	20.5048	2.18231	0.25428	8.58231	9.3e-18	4.82e-17
FAM90A26	1.05675	1.31468	0.352467	3.72993	0.000191531	0.000355177
SLC2A9	231.827	-1.11083	0.110357	-10.0658	7.83e-24	5.94e-23
CLNK	72.0657	1.32783	0.179169	7.41107	1.25e-13	4.94e-13
HS3ST1	1131.89	1.51429	0.16354	9.25949	2.05e-20	1.26e-19
NKX3-2	18.521	3.59658	0.329189	10.9256	8.7e-28	8.21e-27
C1QTNF7	252.197	-2.38751	0.203242	-11.7471	7.31e-32	8.59e-31
BST1	358.808	-1.18887	0.139773	-8.50573	1.8e-17	9.15e-17
FGFBP2	65.9058	-3.05895	0.253345	-12.0743	1.44e-33	1.86e-32
PROM1	1632.67	1.43432	0.304155	4.71575	2.41e-06	5.34e-06
LDB2	1141.63	-2.58623	0.118841	-21.7621	5.31e-105	2.31e-102
NCAPG	666.219	3.20737	0.167123	19.1917	4.35e-82	4.67e-80
SLIT2	1618.6	-2.47806	0.143655	-17.25	1.12e-66	6.59e-65
SOD3	2092.13	-1.04987	0.154967	-6.77482	1.25e-11	4.26e-11
LGI2	630.09	2.71535	0.203493	13.3437	1.29e-40	2.36e-39
CCKAR	2.84197	2.52996	0.638474	3.96251	7.42e-05	0.000143624
PCDH7	1338.22	1.72811	0.211429	8.17348	3e-16	1.41e-15
ARAP2	1606.68	-1.17068	0.118351	-9.89163	4.53e-23	3.28e-22
DTHD1	172.984	-1.68055	0.262612	-6.39937	1.56e-10	4.9e-10
NWD2	2.62771	2.92163	0.546384	5.34721	8.93e-08	2.25e-07
TLR10	198.181	1.21204	0.206805	5.86076	4.61e-09	1.29e-08
TMEM156	310.262	2.46896	0.202512	12.1917	3.44e-34	4.57e-33
KLB	246.986	-1.27904	0.296586	-4.31253	1.61e-05	3.33e-05
UGDH	7581.97	1.88747	0.172653	10.9322	8.09e-28	7.66e-27
CHRNA9	156.812	4.78171	0.416377	11.4841	1.59e-30	1.74e-29
APBB2	2031.14	-1.01658	0.0980791	-10.3649	3.58e-25	2.94e-24
UCHL1	3172.3	3.49201	0.288499	12.1041	1.01e-33	1.3e-32
LIMCH1	8575.67	-1.60975	0.128815	-12.4966	7.79e-36	1.12e-34
PHOX2B	6.65475	4.68397	0.734349	6.3784	1.79e-10	5.59e-10
SHISA3	784.996	1.38198	0.334925	4.12622	3.69e-05	7.36e-05
COX7B2	21.0161	8.32228	0.952007	8.74182	2.29e-18	1.24e-17
GABRA4	2.14351	-2.10488	0.475615	-4.4256	9.62e-06	2.03e-05
GABRB1	3.61284	1.46467	0.518691	2.82377	0.00474617	0.00751903
NIPAL1	258.984	1.06375	0.152794	6.96198	3.36e-12	1.19e-11
CNGA1	92.1684	2.34345	0.230534	10.1653	2.83e-24	2.21e-23
OCIAD2	4977.34	2.18331	0.117677	18.5535	7.65e-77	6.64e-75
CWH43	41.7903	-2.29626	0.376859	-6.09314	1.11e-09	3.26e-09
LRRC66	47.4204	1.99434	0.278684	7.15625	8.29e-13	3.09e-12
SPATA18	709.232	-1.44727	0.218859	-6.6128	3.77e-11	1.24e-10
ERVMER34-1	211.754	1.32921	0.199615	6.65886	2.76e-11	9.18e-11
GSX2	0.904792	1.41029	0.491731	2.86802	0.00413053	0.00659663
SRD5A3	3603.85	1.59541	0.137125	11.6347	2.74e-31	3.12e-30
PDCL2	3.1876	3.56489	0.562412	6.33858	2.32e-10	7.19e-10
NMU	245.749	4.60651	0.268845	17.1345	8.21e-66	4.69e-64
KIAA1211	257.738	1.38856	0.18049	7.69328	1.43e-14	6.01e-14
PPAT	935.971	1.93175	0.101177	19.0929	2.89e-81	3.01e-79
PAICS	5804.93	1.8641	0.0943959	19.7476	8.41e-87	1.16e-84
ARL9	51.0475	2.45272	0.216659	11.3206	1.04e-29	1.09e-28
THEGL	6.57272	3.04188	0.338407	8.98881	2.5e-19	1.43e-18
SPINK2	52.2601	2.76383	0.264446	10.4514	1.44e-25	1.21e-24
ADGRL3	189.201	-1.16885	0.228847	-5.10753	3.26e-07	7.79e-07
GNRHR	8.7224	1.39498	0.262329	5.31766	1.05e-07	2.63e-07
TMPRSS11D	24.5755	3.87015	0.409965	9.44021	3.72e-21	2.38e-20
TMPRSS11A	6.23005	3.4281	0.466041	7.35579	1.9e-13	7.41e-13
TMPRSS11F	1.63757	2.41644	0.562086	4.29906	1.72e-05	3.53e-05
TMPRSS11E	587.62	6.69494	0.336563	19.8921	4.76e-88	7.05e-86
UGT2B15	76.6284	4.67771	0.411954	11.3549	7.01e-30	7.43e-29
UGT2B10	1.59705	2.862	0.636617	4.49564	6.94e-06	1.48e-05
UGT2A3	5.9894	3.03411	0.719191	4.21878	2.46e-05	4.98e-05
UGT2B11	18.9454	5.83487	0.576173	10.1269	4.2e-24	3.24e-23
UGT2B28	3.44709	3.72995	0.591119	6.30998	2.79e-10	8.58e-10
ODAM	30.9376	-3.13558	0.310799	-10.0888	6.2e-24	4.74e-23
FDCSP	179.157	1.69776	0.30217	5.61857	1.93e-08	5.11e-08
AMTN	5.86294	1.48434	0.380636	3.89963	9.63e-05	0.000184206
GC	7.43007	4.31524	0.772156	5.58856	2.29e-08	6.04e-08
NPFFR2	32.2702	3.40418	0.428403	7.94622	1.92e-15	8.62e-15
ALB	322.137	5.22654	0.428338	12.2019	3.04e-34	4.05e-33
AFP	13.5942	4.5267	0.530966	8.52541	1.52e-17	7.77e-17
RASSF6	703.975	1.27385	0.182381	6.98456	2.86e-12	1.02e-11
CXCL6	244.512	1.1878	0.305442	3.88881	0.000100738	0.000192131
PF4	21.3929	-1.99645	0.274227	-7.2803	3.33e-13	1.28e-12
PPBP	94.7457	-2.17083	0.317391	-6.83961	7.94e-12	2.76e-11
CXCL3	386.596	-1.72927	0.200278	-8.63433	5.91e-18	3.11e-17
CXCL2	2472.8	-2.39157	0.197374	-12.117	8.59e-34	1.12e-32
EPGN	28.7777	-1.03753	0.362346	-2.86335	0.00419183	0.00669235
EREG	1480.73	2.55394	0.361348	7.06782	1.57e-12	5.75e-12
C4orf26	9.5977	2.07373	0.290534	7.13763	9.5e-13	3.53e-12
CXCL9	4511	1.31479	0.228875	5.74459	9.21e-09	2.51e-08
FAM47E-STBD1	3.63099	-1.33676	0.172673	-7.74162	9.82e-15	4.17e-14
SOWAHB	556.604	1.22888	0.138643	8.86362	7.75e-19	4.3e-18
CXCL13	1510.82	2.64772	0.248059	10.6737	1.35e-26	1.2e-25
FRAS1	988.065	-1.52065	0.197192	-7.71152	1.24e-14	5.23e-14
ANXA3	3360.4	-1.89816	0.154614	-12.2768	1.21e-34	1.64e-33
NAA11	11.09	4.68642	0.718435	6.5231	6.89e-11	2.22e-10
FGF5	9.62446	3.90186	0.445557	8.75727	2e-18	1.08e-17
C4orf22	33.6709	-1.70066	0.305663	-5.56383	2.64e-08	6.92e-08
PRKG2	159.436	-2.63505	0.1803	-14.6148	2.26e-48	6.05e-47
RASGEF1B	1202.34	-1.46168	0.109536	-13.3443	1.28e-40	2.34e-39
SCD5	995.629	-1.59139	0.166086	-9.58173	9.54e-22	6.36e-21
NKX6-1	12.7648	2.14983	0.302125	7.11571	1.11e-12	4.12e-12
ARHGAP24	798.968	-1.37498	0.106874	-12.8655	7.04e-38	1.12e-36
MAPK10	368.497	-1.0482	0.185517	-5.65016	1.6e-08	4.27e-08
HSD17B13	169.56	-1.46828	0.293622	-5.00056	5.72e-07	1.34e-06
SPARCL1	9776.23	-1.96101	0.127231	-15.4129	1.34e-53	4.62e-52
DSPP	1.26102	2.04838	0.475449	4.30831	1.65e-05	3.4e-05
DMP1	4.63382	2.53027	0.349248	7.24492	4.33e-13	1.65e-12
IBSP	84.3349	4.59	0.32871	13.9637	2.6e-44	5.75e-43
MEPE	8.82679	1.65834	0.348623	4.75683	1.97e-06	4.39e-06
SPP1	27209.4	4.77176	0.239871	19.893	4.68e-88	6.99e-86
ABCG2	294.853	-2.04263	0.140123	-14.5774	3.91e-48	1.04e-46
SNCA	156.583	-1.49255	0.146827	-10.1653	2.83e-24	2.21e-23
MMRN1	600.901	-2.34695	0.180568	-12.9976	1.26e-38	2.1e-37
CCSER1	221.757	1.57026	0.17822	8.81081	1.24e-18	6.82e-18
GRID2	6.249	-1.22851	0.412793	-2.97608	0.0029196	0.00475437
ATOH1	2.51682	3.47672	0.81334	4.27462	1.91e-05	3.93e-05
HPGDS	244.345	-1.3698	0.18651	-7.3444	2.07e-13	8.04e-13
STPG2	11.2642	1.00272	0.201193	4.98391	6.23e-07	1.45e-06
TSPAN5	1505.98	1.10078	0.131095	8.39684	4.59e-17	2.26e-16
ADH4	14.6565	1.59427	0.359469	4.43506	9.2e-06	1.94e-05
ADH1A	9.65099	-1.90347	0.288018	-6.60884	3.87e-11	1.27e-10
ADH1B	4065.74	-3.25325	0.263158	-12.3623	4.18e-35	5.82e-34
ADH1C	591.012	1.23784	0.311977	3.96773	7.26e-05	0.000140693
AC083902.2	46.0612	3.62636	0.343022	10.5718	4.03e-26	3.46e-25
DDIT4L	532.235	3.30607	0.236074	14.0044	1.47e-44	3.29e-43
EMCN	938.938	-2.72645	0.150956	-18.0612	6.44e-73	4.75e-71
SLC39A8	8261.29	-2.49776	0.136565	-18.2899	9.96e-75	7.82e-73
CENPE	559.345	2.64971	0.156794	16.8993	4.55e-64	2.39e-62
NPNT	4620.35	-1.79195	0.179318	-9.99318	1.63e-23	1.21e-22
DKK2	261.072	-2.29881	0.15595	-14.7406	3.53e-49	9.88e-48
SGMS2	3960.81	-1.34326	0.126862	-10.5883	3.38e-26	2.92e-25
ETNPPL	55.0825	6.01833	0.597396	10.0743	7.18e-24	5.46e-23
COL25A1	381.283	4.42949	0.396824	11.1623	6.23e-29	6.26e-28
EGF	454.383	2.25783	0.208594	10.8241	2.65e-27	2.43e-26
ELOVL6	866.938	1.25902	0.18308	6.8769	6.12e-12	2.14e-11
PITX2	332.509	8.21493	0.392171	20.9473	1.99e-97	4.62e-95
C4orf32	694.379	-1.11833	0.100765	-11.0984	1.28e-28	1.26e-27
NEUROG2	1.19785	2.19186	0.55166	3.97321	7.09e-05	0.000137563
ZGRF1	233.319	1.11182	0.123394	9.01034	2.05e-19	1.18e-18
UGT8	667.062	2.16371	0.221782	9.75604	1.74e-22	1.21e-21
NDST4	3.01711	2.00522	0.609844	3.28809	0.0010087	0.00173455
PRSS12	820.621	-1.02729	0.234358	-4.3834	1.17e-05	2.44e-05
SYNPO2	1036.49	-1.80259	0.154894	-11.6375	2.66e-31	3.03e-30
PDE5A	1211.69	-1.60131	0.131332	-12.1928	3.4e-34	4.52e-33
MAD2L1	882.329	2.55584	0.154046	16.5915	8.03e-62	3.83e-60
PRDM5	284.711	-1.17485	0.118684	-9.89898	4.21e-23	3.06e-22
NDNF	4188.74	-1.80195	0.200479	-8.98824	2.51e-19	1.44e-18
QRFPR	3.29815	-2.14236	0.385859	-5.55217	2.82e-08	7.38e-08
CCNA2	903.814	2.89235	0.156763	18.4505	5.17e-76	4.3e-74
TRPC3	29.5727	-1.24881	0.194077	-6.4346	1.24e-10	3.92e-10
IL21	2.73027	1.28762	0.339431	3.79346	0.000148564	0.000278429
FGF2	278.731	-2.00095	0.175391	-11.4085	3.79e-30	4.08e-29
FAT4	952.777	-1.19787	0.170746	-7.01551	2.29e-12	8.25e-12
PLK4	398.577	2.04164	0.133541	15.2885	9.12e-53	3.01e-51
PCDH10	52.482	-1.24999	0.270093	-4.62799	3.69e-06	8.05e-06
SLC7A11	1992.5	3.07332	0.239617	12.826	1.17e-37	1.84e-36
CLGN	257.846	1.5702	0.246757	6.36334	1.97e-10	6.15e-10
MGAT4D	1.34844	-1.78891	0.396243	-4.51468	6.34e-06	1.36e-05
UCP1	1.82153	-1.12882	0.299144	-3.77351	0.000160969	0.000300641
GAB1	1316.26	-1.33767	0.104938	-12.7472	3.23e-37	4.99e-36
FREM3	24.1453	-4.25962	0.281272	-15.1441	8.28e-52	2.64e-50
GYPE	38.2994	-3.25896	0.177706	-18.339	4.04e-75	3.24e-73
GYPB	0.959181	-2.55547	0.526868	-4.85031	1.23e-06	2.8e-06
GYPA	0.832354	-1.63508	0.40875	-4.00018	6.33e-05	0.000123401
HHIP	1346.61	-2.85367	0.294265	-9.69763	3.09e-22	2.12e-21
TTC29	81.534	-2.0906	0.323723	-6.45799	1.06e-10	3.38e-10
IQCM	2.27128	3.16398	0.566333	5.58678	2.31e-08	6.09e-08
MAB21L2	3.14268	-1.00676	0.332932	-3.02392	0.00249525	0.0040937
PRSS48	3.56966	1.26258	0.472764	2.67063	0.00757087	0.0116973
FHDC1	1294.31	-1.14698	0.117484	-9.7629	1.62e-22	1.13e-21
TRIM2	5394.87	1.4032	0.140404	9.99397	1.62e-23	1.2e-22
MND1	146.166	2.90197	0.149666	19.3896	9.45e-84	1.12e-81
SFRP2	5997.07	1.27445	0.215062	5.92597	3.1e-09	8.8e-09
FGB	6741.36	8.67372	0.506864	17.1125	1.2e-65	6.7e-64
FGA	13987.1	3.98442	0.41887	9.51232	1.86e-21	1.22e-20
FGG	20113.6	1.235	0.377989	3.26729	0.00108582	0.0018594
LRAT	199.01	1.68819	0.218299	7.73337	1.05e-14	4.44e-14
RBM46	4.65702	2.2745	0.42102	5.40237	6.58e-08	1.67e-07
NPY2R	0.813526	-1.52613	0.487801	-3.12859	0.00175649	0.00293188
ASIC5	3.14417	3.15936	0.440193	7.17721	7.11e-13	2.66e-12
TDO2	265.016	1.64035	0.183761	8.92657	4.39e-19	2.47e-18
GRIA2	7.28875	1.63238	0.329426	4.95522	7.22e-07	1.68e-06
RXFP1	102.35	-3.08461	0.174089	-17.7185	3.02e-70	2.08e-68
FSTL5	26.2111	3.49166	0.541312	6.45037	1.12e-10	3.54e-10
NPY5R	6.0055	-1.26148	0.359651	-3.50752	0.000452313	0.000805976
TKTL2	1.86511	1.80808	0.41348	4.37283	1.23e-05	2.56e-05
SMIM31	233.942	2.68755	0.304789	8.81774	1.17e-18	6.41e-18
APELA	34.9324	2.03879	0.293497	6.94654	3.74e-12	1.33e-11
GK3P	5.02208	1.06664	0.335822	3.1762	0.0014922	0.00251153
MSMO1	4183.66	-1.09482	0.105226	-10.4045	2.37e-25	1.96e-24
TLL1	163.308	-1.57204	0.16183	-9.71415	2.62e-22	1.81e-21
ANXA10	167.53	5.86262	0.434606	13.4895	1.8e-41	3.44e-40
MFAP3L	248.687	-2.09674	0.171755	-12.2078	2.83e-34	3.78e-33
GALNTL6	93.729	1.55997	0.291541	5.35075	8.76e-08	2.21e-07
GALNT7	3583.58	1.70459	0.108634	15.6911	1.74e-55	6.42e-54
GLRA3	82.5627	3.85411	0.31832	12.1076	9.62e-34	1.25e-32
GPM6A	424.733	-4.41421	0.263861	-16.7293	8.02e-63	3.96e-61
SPATA4	24.6753	-1.9902	0.269181	-7.39355	1.43e-13	5.62e-13
NEIL3	218.725	4.28945	0.220557	19.4482	3.02e-84	3.64e-82
WWC2	2140.81	-2.35557	0.106034	-22.2152	2.45e-109	1.45e-106
CLDN24	1.71517	-1.4294	0.374169	-3.8202	0.000133344	0.00025123
ENPP6	22.6606	-1.33771	0.187371	-7.13934	9.38e-13	3.48e-12
CENPU	708.816	2.37713	0.139379	17.0551	3.2e-65	1.76e-63
HELT	3.99602	-3.28508	0.415093	-7.91408	2.49e-15	1.11e-14
SNX25	1903.58	-1.21619	0.125038	-9.72657	2.32e-22	1.61e-21
LRP2BP	293.943	-1.55805	0.168656	-9.23801	2.51e-20	1.53e-19
F11	98.8112	-2.72909	0.322652	-8.45831	2.71e-17	1.36e-16
MTNR1A	8.94874	3.8563	0.403335	9.56104	1.17e-21	7.73e-21
FAT1	7779.27	1.14333	0.145855	7.83886	4.55e-15	1.98e-14
ZFP42	78.6079	1.60844	0.493978	3.25609	0.00112959	0.00192996
TRIML2	1.85703	1.03508	0.489866	2.11299	0.0346012	0.0489287
TRIML1	0.519389	-1.25504	0.570027	-2.20172	0.0276854	0.0397385
PLEKHG4B	742.524	1.67403	0.251781	6.64875	2.96e-11	9.8e-11
LRRC14B	4.36076	3.1877	0.369292	8.63191	6.03e-18	3.17e-17
PDCD6	5832.3	1.0844	0.089833	12.0713	1.5e-33	1.93e-32
SLC9A3	66.5023	2.25711	0.241909	9.3304	1.05e-20	6.57e-20
CEP72	392.754	1.29059	0.111545	11.5701	5.84e-31	6.55e-30
TPPP	1176.53	-1.68282	0.184207	-9.1355	6.51e-20	3.85e-19
TRIP13	972.194	2.52574	0.168863	14.9574	1.39e-50	4.18e-49
NKD2	570.543	-1.14946	0.153836	-7.47196	7.9e-14	3.16e-13
SLC12A7	7828.32	1.18269	0.122212	9.67735	3.76e-22	2.57e-21
SLC6A18	2.97193	2.14603	0.544443	3.9417	8.09e-05	0.000156166
TERT	41.3821	5.36467	0.329094	16.3013	9.66e-60	4.2e-58
SLC6A3	355.075	3.7451	0.34866	10.7414	6.5e-27	5.86e-26
MRPL36	912.914	1.06231	0.107803	9.85412	6.58e-23	4.72e-22
IRX4	6.94103	3.90367	0.584038	6.68393	2.33e-11	7.79e-11
C5orf38	463.312	-1.10617	0.240433	-4.60074	4.21e-06	9.15e-06
IRX1	129.921	-1.37446	0.333718	-4.11862	3.81e-05	7.59e-05
ADAMTS16	282.979	2.30355	0.207236	11.1156	1.05e-28	1.05e-27
UBE2QL1	69.2523	2.14097	0.237342	9.02061	1.87e-19	1.08e-18
NSUN2	4670.16	1.02493	0.0844079	12.1426	6.28e-34	8.23e-33
SRD5A1	1317.87	1.55556	0.121445	12.8088	1.46e-37	2.29e-36
C5orf49	318.521	-1.5423	0.242341	-6.36418	1.96e-10	6.11e-10
SEMA5A	1631.64	-2.53249	0.169283	-14.9601	1.34e-50	4.02e-49
CCT5	10733.2	1.25594	0.101696	12.3499	4.88e-35	6.77e-34
CMBL	2661.85	1.36663	0.191955	7.11951	1.08e-12	4.01e-12
ROPN1L	156.043	-1.81735	0.264893	-6.8607	6.85e-12	2.39e-11
ANKRD33B	258.233	-1.71951	0.178045	-9.65773	4.56e-22	3.1e-21
FAM105A	2116.48	-1.09445	0.180159	-6.07491	1.24e-09	3.63e-09
FBXL7	468.534	-1.02169	0.127684	-8.00173	1.23e-15	5.57e-15
2021-03-11	5.88822	3.46282	0.871204	3.97475	7.05e-05	0.000136718
RETREG1	731.64	-1.41551	0.181779	-7.78698	6.86e-15	2.95e-14
BASP1	4133.01	1.78662	0.18659	9.57511	1.02e-21	6.76e-21
CDH18	22.5909	4.10982	0.548253	7.49621	6.57e-14	2.64e-13
CDH12	14.7186	1.74139	0.420104	4.14513	3.4e-05	6.8e-05
PRDM9	3.18743	3.81647	0.749389	5.09278	3.53e-07	8.41e-07
CDH10	13.1967	-1.16182	0.33031	-3.51735	0.000435871	0.000778167
PDZD2	1661.44	-2.22167	0.174039	-12.7653	2.56e-37	3.97e-36
NPR3	1184.47	-1.80249	0.161779	-11.1417	7.86e-29	7.87e-28
ADAMTS12	1260.92	1.81378	0.16414	11.0502	2.19e-28	2.13e-27
SLC45A2	9.281	1.5765	0.272104	5.79373	6.88e-09	1.89e-08
BRIX1	2013.42	1.23178	0.0959735	12.8346	1.05e-37	1.65e-36
AGXT2	2.58744	1.32328	0.505232	2.61915	0.00881485	0.0135094
PRLR	506.902	1.53287	0.262389	5.84199	5.16e-09	1.43e-08
IL7R	3500.03	-2.04982	0.158996	-12.8923	4.97e-38	7.98e-37
CAPSL	142.806	-2.07868	0.328224	-6.33311	2.4e-10	7.44e-10
UGT3A1	41.2869	4.28113	0.704278	6.07875	1.21e-09	3.55e-09
UGT3A2	18.0242	2.03983	0.314657	6.48271	9.01e-11	2.88e-10
SKP2	939.181	1.25525	0.128342	9.78055	1.36e-22	9.58e-22
RANBP3L	58.3661	-1.82994	0.188154	-9.72578	2.34e-22	1.62e-21
NUP155	2522.8	1.31683	0.101884	12.9249	3.26e-38	5.26e-37
GDNF	30.2979	2.50555	0.258525	9.69169	3.27e-22	2.24e-21
LIFR	3953.81	-1.60796	0.150062	-10.7153	8.63e-27	7.71e-26
DAB2	3650.52	-1.09429	0.113442	-9.64627	5.1e-22	3.45e-21
PTGER4	807.088	-1.59383	0.133038	-11.9803	4.51e-33	5.65e-32
C7	5294.9	-1.78005	0.224773	-7.91932	2.39e-15	1.06e-14
C6	241.243	-2.02598	0.298939	-6.77725	1.22e-11	4.2e-11
PLCXD3	188.436	-1.04191	0.256855	-4.05641	4.98e-05	9.82e-05
GHR	147.269	-2.00385	0.17163	-11.6754	1.7e-31	1.96e-30
CCDC152	103.302	-1.3369	0.125197	-10.6783	1.29e-26	1.14e-25
SELENOP	5686.74	-1.65326	0.150688	-10.9714	5.24e-28	5.03e-27
NIM1K	98.1929	-2.28212	0.202292	-11.2813	1.62e-29	1.68e-28
CCL28	653.138	1.00763	0.192485	5.23486	1.65e-07	4.05e-07
C5orf34	181.046	2.03014	0.132767	15.2911	8.77e-53	2.9e-51
FGF10	33.0118	-2.93011	0.26719	-10.9664	5.54e-28	5.32e-27
HCN1	31.26	2.001	0.383323	5.22015	1.79e-07	4.37e-07
EMB	4617.29	1.2262	0.145808	8.40969	4.11e-17	2.04e-16
ISL1	43.2824	4.18879	0.469132	8.92882	4.31e-19	2.43e-18
ITGA2	5091.22	1.54084	0.183246	8.40858	4.15e-17	2.06e-16
HSPB3	12.9349	-2.52417	0.227048	-11.1174	1.03e-28	1.03e-27
CDC20B	73.2353	1.28771	0.346009	3.7216	0.000197961	0.000366614
GPX8	1326.79	1.20885	0.132838	9.10025	9.01e-20	5.29e-19
MCIDAS	107.089	2.94677	0.224471	13.1276	2.29e-39	3.93e-38
CCNO	465.125	2.15394	0.209969	10.2584	1.09e-24	8.67e-24
DDX4	5.14067	2.75049	0.34903	7.88039	3.26e-15	1.44e-14
IL31RA	162.807	4.05643	0.274364	14.7848	1.84e-49	5.22e-48
C5orf67	2.05708	-1.22696	0.220106	-5.5744	2.48e-08	6.53e-08
ACTBL2	18.5529	1.70332	0.268031	6.35493	2.09e-10	6.49e-10
DEPDC1B	340.897	3.59789	0.171537	20.9744	1.12e-97	2.71e-95
LRRC70	24.2335	-1.07283	0.152199	-7.04891	1.8e-12	6.56e-12
FAM159B	4.33626	1.84973	0.384673	4.80858	1.52e-06	3.43e-06
CENPK	312.125	2.23576	0.143721	15.5563	1.44e-54	5.16e-53
NLN	1755.45	1.40136	0.0825444	16.977	1.21e-64	6.54e-63
PIK3R1	2608.91	-1.03855	0.100882	-10.2948	7.44e-25	5.99e-24
CCNB1	1808.33	2.97134	0.148219	20.047	2.15e-89	3.58e-87
CENPH	382.539	1.42119	0.112271	12.6586	1e-36	1.52e-35
CARTPT	0.635774	-2.29343	0.719454	-3.18774	0.0014339	0.00241758
ZNF366	117.743	-1.96457	0.142129	-13.8224	1.87e-43	3.96e-42
TMEM171	71.0054	2.87095	0.24366	11.7826	4.8e-32	5.72e-31
FOXD1	57.018	2.16435	0.330159	6.5555	5.55e-11	1.8e-10
ENC1	4418.75	1.23115	0.120612	10.2075	1.84e-24	1.45e-23
FAM169A	107.628	1.2029	0.18617	6.46132	1.04e-10	3.31e-10
GCNT4	199.621	-1.11363	0.185329	-6.00895	1.87e-09	5.39e-09
F2RL2	134.037	1.30253	0.24359	5.34723	8.93e-08	2.25e-07
F2RL1	1405.2	1.325	0.166479	7.95898	1.73e-15	7.8e-15
CRHBP	13.6517	-1.18524	0.174319	-6.79927	1.05e-11	3.62e-11
PDE8B	307.904	-1.48855	0.124876	-11.9202	9.29e-33	1.15e-31
OTP	2.14552	1.26778	0.388969	3.25934	0.0011167	0.00190928
DMGDH	149.981	1.78788	0.212624	8.40862	4.15e-17	2.06e-16
BHMT2	753.239	2.87872	0.291027	9.89159	4.53e-23	3.28e-22
BHMT	24.0592	2.66133	0.336633	7.90572	2.66e-15	1.18e-14
THBS4	544.343	1.80901	0.268197	6.74509	1.53e-11	5.19e-11
SPZ1	0.591455	1.30572	0.603922	2.16206	0.0306135	0.043696
ANKRD34B	111.277	5.07864	0.355637	14.2804	2.9e-46	7.08e-45
ACOT12	1.13266	1.64032	0.464296	3.53292	0.000410998	0.000735912
VCAN	11497.9	1.71225	0.171981	9.95604	2.37e-23	1.75e-22
FAM81B	211.864	-1.24022	0.246452	-5.03229	4.85e-07	1.14e-06
PCSK1	898.595	5.73137	0.401671	14.2688	3.42e-46	8.3e-45
SLCO4C1	995.222	-1.20105	0.216766	-5.54076	3.01e-08	7.86e-08
SLCO6A1	8.64485	4.55139	0.604265	7.53211	4.99e-14	2.02e-13
EFNA5	1677	1.43086	0.149185	9.59118	8.71e-22	5.81e-21
TMEM232	108.186	-1.77428	0.239731	-7.40115	1.35e-13	5.32e-13
TSLP	38.3865	-1.74534	0.202055	-8.63793	5.72e-18	3.01e-17
MCC	740.764	-1.20297	0.134655	-8.93369	4.12e-19	2.33e-18
CDO1	134.306	-2.67506	0.177784	-15.0467	3.63e-51	1.12e-49
SEMA6A	624.448	-2.52985	0.156135	-16.203	4.8e-59	2.04e-57
ZNF474	61.2815	-1.41339	0.227745	-6.20601	5.43e-10	1.64e-09
AC010255.3	3.92942	-1.11372	0.394178	-2.82543	0.0047217	0.00748329
LMNB1	2048.08	1.8721	0.122384	15.2969	8.02e-53	2.67e-51
MEGF10	55.9473	2.7209	0.269225	10.1064	5.17e-24	3.98e-23
CTXN3	1.21381	1.28718	0.510877	2.51954	0.0117508	0.0177245
FBN2	146.725	1.27904	0.245212	5.21605	1.83e-07	4.47e-07
SLC27A6	29.5034	-2.42057	0.349892	-6.91806	4.58e-12	1.62e-11
MEIKIN	1.83613	1.11802	0.353864	3.15948	0.00158053	0.0026513
PDLIM4	978.5	1.22703	0.189152	6.487	8.76e-11	2.8e-10
SLC22A4	203.308	-1.23434	0.163284	-7.55943	4.05e-14	1.65e-13
IL13	4.56725	-1.76754	0.232265	-7.61005	2.74e-14	1.13e-13
CCNI2	76.9207	1.76823	0.180172	9.81415	9.79e-23	6.94e-22
FSTL4	876.521	2.53845	0.284727	8.91538	4.86e-19	2.73e-18
PITX1	694.871	4.54249	0.264204	17.1931	2.99e-66	1.73e-64
CXCL14	7107.26	4.31913	0.314831	13.7189	7.83e-43	1.61e-41
AC114296.1	4.21671	3.23165	0.424021	7.62145	2.51e-14	1.03e-13
SLC25A48	12.4879	4.23627	0.381605	11.1012	1.24e-28	1.23e-27
AC009014.1	5.35028	2.15023	0.468606	4.58856	4.46e-06	9.68e-06
TRPC7	0.852625	1.89961	0.570954	3.32708	0.000877603	0.0015172
SPOCK1	691.893	3.09167	0.257401	12.0111	3.11e-33	3.94e-32
KIF20A	857.177	3.15096	0.147187	21.4079	1.13e-101	3.62e-99
GFRA3	1075.01	2.98576	0.321893	9.27564	1.77e-20	1.08e-19
CDC25C	196.559	3.66455	0.166334	22.0313	1.44e-107	7.24e-105
REEP2	96.1568	1.01118	0.170419	5.93351	2.97e-09	8.42e-09
EGR1	13377.9	-1.85208	0.17003	-10.8926	1.25e-27	1.17e-26
LRRTM2	24.32	-1.19847	0.20514	-5.84223	5.15e-09	1.43e-08
MATR3	63.9818	1.0496	0.121078	8.66881	4.37e-18	2.31e-17
MZB1	1982.81	2.1081	0.209652	10.0553	8.71e-24	6.59e-23
AC142391.1	0.408832	-2.42263	0.328204	-7.38149	1.57e-13	6.14e-13
ECSCR	187.117	-2.3689	0.1127	-21.0196	4.34e-98	1.07e-95
HBEGF	1838.95	-2.57623	0.15283	-16.8568	9.35e-64	4.86e-62
PCDHA1	33.7588	1.91294	0.292723	6.53499	6.36e-11	2.06e-10
PCDHA4	95.721	1.16925	0.244885	4.77471	1.8e-06	4.03e-06
PCDHA5	23.8698	1.65625	0.241099	6.86961	6.44e-12	2.25e-11
PCDHA6	42.393	1.71218	0.270631	6.32664	2.51e-10	7.74e-10
PCDHA7	32.038	1.32254	0.237444	5.56988	2.55e-08	6.69e-08
PCDHA8	7.45494	1.48633	0.267304	5.56043	2.69e-08	7.05e-08
PCDHA9	11.4492	1.5498	0.283587	5.46499	4.63e-08	1.19e-07
PCDHA11	101.179	1.05091	0.209565	5.01473	5.31e-07	1.24e-06
PCDHA12	87.5546	-1.16873	0.223284	-5.23428	1.66e-07	4.06e-07
PCDHB2	376.57	1.01571	0.182071	5.57865	2.42e-08	6.38e-08
PCDHB4	131.122	-1.02567	0.13621	-7.53006	5.07e-14	2.05e-13
PCDHB8	101.028	1.40316	0.242726	5.78081	7.43e-09	2.04e-08
SLC25A2	3.49389	1.27014	0.291747	4.35358	1.34e-05	2.79e-05
PCDHGA1	56.3691	1.30047	0.185368	7.01563	2.29e-12	8.24e-12
PCDHGA8	40.6727	1.71002	0.279641	6.11505	9.65e-10	2.85e-09
PCDHGA9	78.365	-1.0296	0.147203	-6.99442	2.66e-12	9.55e-12
PCDHGB7	206.15	-1.76962	0.135968	-13.015	1.01e-38	1.67e-37
PCDHGA12	102.814	-1.32094	0.148698	-8.88334	6.49e-19	3.61e-18
PCDHGC3	831.065	-1.5634	0.133539	-11.7075	1.17e-31	1.36e-30
ARAP3	1047.17	-1.3406	0.0949927	-14.1127	3.17e-45	7.41e-44
PCDH12	1077.68	-1.70506	0.111553	-15.2847	9.67e-53	3.18e-51
SPRY4	3263.47	-1.11995	0.131529	-8.51483	1.67e-17	8.49e-17
KCTD16	69.9736	-1.58864	0.192355	-8.25889	1.47e-16	7.06e-16
POU4F3	3.28112	1.34277	0.291867	4.60063	4.21e-06	9.15e-06
GPR151	0.796249	1.32564	0.593236	2.2346	0.0254439	0.0366853
STK32A	1045.17	2.07954	0.180071	11.5485	7.51e-31	8.4e-30
SPINK1	9255.4	6.67961	0.361122	18.4969	2.19e-76	1.86e-74
C5orf46	56.5817	2.10059	0.238961	8.79049	1.49e-18	8.14e-18
SPINK5	1302.39	1.44392	0.288268	5.00894	5.47e-07	1.28e-06
SPINK13	63.9404	3.19249	0.314588	10.1482	3.38e-24	2.63e-23
ADRB2	448.476	-3.07936	0.163215	-18.8669	2.13e-79	2.03e-77
ABLIM3	1020.16	-1.40874	0.160495	-8.77748	1.67e-18	9.09e-18
AFAP1L1	726.582	-1.70458	0.110003	-15.4958	3.7e-54	1.3e-52
ARHGEF37	463.108	-1.33105	0.145177	-9.16848	4.8e-20	2.86e-19
PPARGC1B	307.789	-1.41182	0.135349	-10.431	1.79e-25	1.49e-24
CDX1	17.3354	1.81057	0.193772	9.3438	9.29e-21	5.82e-20
SLC6A7	9.65164	1.06177	0.198265	5.35531	8.54e-08	2.15e-07
CAMK2A	35.0218	-1.5352	0.173156	-8.86596	7.58e-19	4.21e-18
NDST1	5612.69	-1.59434	0.0851126	-18.7321	2.71e-78	2.45e-76
SYNPO	6876.68	-1.72168	0.112108	-15.3574	3.16e-53	1.07e-51
MYOZ3	47.4207	-1.39431	0.149981	-9.2966	1.45e-20	8.93e-20
ZNF300	266.156	1.19641	0.173441	6.89807	5.27e-12	1.85e-11
GPX3	13656.3	-2.24505	0.165532	-13.5627	6.67e-42	1.31e-40
CCDC69	2596.38	-1.49774	0.12363	-12.1147	8.83e-34	1.15e-32
FAT2	254.805	2.09698	0.296013	7.08408	1.4e-12	5.13e-12
NMUR2	14.9359	-1.03296	0.353843	-2.91927	0.00350851	0.00565266
GRIA1	182.742	-3.70812	0.273869	-13.5398	9.11e-42	1.77e-40
KIF4B	2.08385	1.11182	0.274778	4.04623	5.2e-05	0.000102332
HAVCR1	122.248	5.19849	0.337912	15.3842	2.09e-53	7.14e-52
FNDC9	4.16251	1.9718	0.362262	5.44302	5.24e-08	1.35e-07
NIPAL4	40.5636	1.32464	0.244383	5.42035	5.95e-08	1.52e-07
SOX30	38.8969	1.57466	0.24733	6.36663	1.93e-10	6.02e-10
C1QTNF2	81.4428	-1.86591	0.145257	-12.8456	9.11e-38	1.44e-36
PTTG1	1064.57	2.33159	0.145833	15.9881	1.55e-57	6.19e-56
ATP10B	737.967	5.50252	0.272421	20.1986	1.01e-90	1.82e-88
GABRG2	14.6043	4.94934	0.776549	6.37351	1.85e-10	5.77e-10
HMMR	665.219	3.03899	0.158742	19.1442	1.08e-81	1.15e-79
FBLL1	15.1095	1.30545	0.321954	4.05477	5.02e-05	9.88e-05
SLIT3	2114.85	-2.40991	0.177026	-13.6133	3.34e-42	6.66e-41
SPDL1	541.616	1.29948	0.0959437	13.5441	8.58e-42	1.67e-40
FAM196B	18.2892	1.65956	0.283816	5.84732	5e-09	1.39e-08
C5orf58	27.6041	1.07095	0.212762	5.03353	4.82e-07	1.13e-06
KCNIP1	23.1797	-2.10745	0.17989	-11.7152	1.07e-31	1.24e-30
GABRP	365.716	2.12117	0.33041	6.41983	1.36e-10	4.3e-10
TLX3	1.74026	2.47577	0.755181	3.27838	0.00104406	0.0017915
SMIM23	1.53987	1.51123	0.397229	3.80442	0.000142134	0.000267121
DUSP1	18143.2	-1.56701	0.162581	-9.63838	5.5e-22	3.72e-21
NKX2-5	4.69676	3.28134	0.560838	5.85078	4.89e-09	1.36e-08
HGNC:24955	14.0161	1.52955	0.349472	4.37674	1.2e-05	2.52e-05
MSX2	103.012	1.38634	0.206522	6.71281	1.91e-11	6.43e-11
SFXN1	2135.39	1.50955	0.0771914	19.556	3.67e-85	4.63e-83
CPLX2	567.188	4.71678	0.507237	9.29896	1.42e-20	8.75e-20
CDHR2	113.846	3.41228	0.299165	11.406	3.9e-30	4.19e-29
GPRIN1	459.61	2.71013	0.148758	18.2184	3.69e-74	2.84e-72
SNCB	4.75727	1.13897	0.291349	3.90932	9.26e-05	0.00017736
EIF4E1B	10.2914	4.83614	0.656416	7.36749	1.74e-13	6.81e-13
HK3	903.922	-1.79129	0.166377	-10.7664	4.96e-27	4.49e-26
FGFR4	1014.14	-2.44171	0.198443	-12.3043	8.58e-35	1.18e-33
MXD3	347.197	1.39028	0.12415	11.1984	4.15e-29	4.21e-28
RGS14	1157.35	1.02108	0.102346	9.97668	1.93e-23	1.43e-22
SLC34A1	5.5146	1.70403	0.282873	6.024	1.7e-09	4.93e-09
F12	236.012	2.84056	0.179666	15.8103	2.64e-56	1.01e-54
PRR7	132.473	1.43599	0.149371	9.61358	7.01e-22	4.7e-21
DBN1	4860.93	1.15033	0.110739	10.3878	2.82e-25	2.33e-24
C5orf60	2.32708	1.2488	0.273439	4.56701	4.95e-06	1.07e-05
LTC4S	2.00457	-1.67358	0.184056	-9.09277	9.65e-20	5.66e-19
RASGEF1C	20.931	3.35757	0.350922	9.56785	1.09e-21	7.25e-21
FLT4	1075.33	-1.33957	0.122189	-10.9631	5.75e-28	5.51e-27
BTNL8	43.2899	-1.41693	0.303389	-4.67034	3.01e-06	6.61e-06
BTNL3	11.0999	-1.23654	0.45734	-2.70376	0.00685598	0.0106526
BTNL9	590.585	-3.39157	0.208727	-16.2488	2.28e-59	9.73e-58
FOXQ1	997.818	1.42083	0.237267	5.98831	2.12e-09	6.09e-09
FOXF2	394.908	-1.23018	0.157417	-7.81476	5.51e-15	2.38e-14
GMDS	1429.52	1.47596	0.120454	12.2532	1.61e-34	2.18e-33
BPHL	916.219	1.27657	0.0931117	13.7101	8.84e-43	1.81e-41
TUBB2A	809.129	1.10884	0.147556	7.51468	5.71e-14	2.3e-13
TUBB2B	599.837	3.9477	0.29828	13.2349	5.52e-40	9.78e-39
PXDC1	1853.7	-1.07499	0.110027	-9.7702	1.51e-22	1.06e-21
RPP40	276.788	1.53744	0.106601	14.4223	3.75e-47	9.49e-46
PPP1R3G	131.334	1.10332	0.166768	6.61593	3.69e-11	1.22e-10
NRN1	469.016	-1.67474	0.180039	-9.30207	1.38e-20	8.51e-20
LY86	538.719	-1.397	0.147004	-9.50313	2.04e-21	1.33e-20
CAGE1	6.61283	2.09432	0.29927	6.9981	2.59e-12	9.31e-12
DSP	16618.5	2.1691	0.176671	12.2777	1.19e-34	1.63e-33
OFCC1	8.58063	4.527	0.597057	7.5822	3.4e-14	1.39e-13
TFAP2A	722.654	3.75033	0.202644	18.5069	1.82e-76	1.55e-74
ELOVL2	93.8413	1.62854	0.210176	7.74847	9.3e-15	3.96e-14
ERVFRD-1	22.4092	-1.88846	0.243473	-7.75636	8.74e-15	3.73e-14
NEDD9	8461.26	-1.57388	0.14799	-10.6351	2.05e-26	1.79e-25
ADTRP	294.021	-2.1197	0.186234	-11.3819	5.14e-30	5.5e-29
EDN1	1538.34	-2.02104	0.167246	-12.0842	1.28e-33	1.65e-32
PHACTR1	989.686	-2.27522	0.146694	-15.51	2.97e-54	1.05e-52
GFOD1	515.313	-1.77785	0.129162	-13.7645	4.17e-43	8.67e-42
RNF182	88.5968	-2.02152	0.233177	-8.66945	4.34e-18	2.3e-17
CD83	1552.26	-1.69575	0.122623	-13.829	1.7e-43	3.62e-42
STMND1	110.828	-1.52815	0.287469	-5.31586	1.06e-07	2.65e-07
RBM24	44.3465	-1.08625	0.240808	-4.51086	6.46e-06	1.38e-05
RNF144B	1969.05	-1.69671	0.115188	-14.73	4.14e-49	1.15e-47
ID4	1067.34	-1.84627	0.178131	-10.3647	3.59e-25	2.94e-24
E2F3	1340.54	1.37575	0.0857699	16.04	6.72e-58	2.73e-56
SOX4	10660	1.66889	0.103867	16.0675	4.31e-58	1.77e-56
DCDC2	336.787	-1.2476	0.228942	-5.44944	5.05e-08	1.3e-07
KIAA0319	358.21	1.04127	0.267122	3.89812	9.69e-05	0.000185321
GMNN	841.498	1.36003	0.109983	12.3658	4e-35	5.58e-34
C6orf229	5.11917	-3.51307	0.327354	-10.7317	7.23e-27	6.49e-26
HIST1H2BA	1.31367	2.56648	0.701082	3.66075	0.000251479	0.000460577
SLC17A4	3.64385	3.45672	0.636704	5.42909	5.66e-08	1.45e-07
SLC17A1	3.55399	1.18958	0.50008	2.37879	0.0173698	0.0256067
HIST1H1A	2.75414	3.44068	0.798699	4.30786	1.65e-05	3.4e-05
HIST1H3A	6.58142	2.65532	0.365967	7.25562	4e-13	1.53e-12
HIST1H4A	4.67624	3.82641	0.514166	7.44197	9.92e-14	3.94e-13
HIST1H4B	10.3494	4.15932	0.478786	8.68721	3.71e-18	1.97e-17
HIST1H3B	17.3907	5.40879	0.466195	11.602	4.03e-31	4.55e-30
HIST1H2AB	5.66874	4.1368	0.501647	8.24643	1.63e-16	7.81e-16
HIST1H2BB	5.30781	4.08739	0.580668	7.03912	1.93e-12	7.02e-12
HIST1H3C	9.67362	4.96928	0.454212	10.9404	7.38e-28	7.03e-27
HIST1H1C	2462.56	1.58404	0.172066	9.206	3.39e-20	2.04e-19
HIST1H4C	18.7417	4.12625	0.423668	9.73934	2.05e-22	1.42e-21
HIST1H1T	2.50759	2.61526	0.387921	6.74173	1.57e-11	5.31e-11
HIST1H2BC	325.649	2.1369	0.195617	10.9239	8.86e-28	8.35e-27
HIST1H2AC	2593.89	1.18253	0.151003	7.83117	4.83e-15	2.1e-14
HIST1H1E	45.4836	3.81163	0.310031	12.2943	9.71e-35	1.33e-33
HIST1H2BD	913.866	2.5883	0.145386	17.8029	6.71e-71	4.72e-69
HIST1H2BE	13.3648	3.22731	0.319381	10.1049	5.26e-24	4.04e-23
HIST1H4D	13.881	3.77577	0.433412	8.71174	2.99e-18	1.6e-17
HIST1H3D	38.6994	3.18666	0.264464	12.0495	1.95e-33	2.5e-32
HIST1H2AD	27.652	3.64979	0.321244	11.3614	6.51e-30	6.92e-29
HIST1H2BF	17.7558	4.67852	0.402269	11.6303	2.89e-31	3.28e-30
HIST1H4E	27.1042	3.85907	0.358985	10.75	5.93e-27	5.35e-26
HIST1H2BG	94.4296	3.7135	0.281564	13.1888	1.02e-39	1.77e-38
HIST1H2AE	68.3524	3.5263	0.28669	12.3	9.05e-35	1.24e-33
HIST1H3E	33.8132	1.9319	0.232264	8.31767	8.97e-17	4.37e-16
HIST1H1D	37.1936	5.29418	0.412764	12.8262	1.17e-37	1.84e-36
HIST1H4F	4.37355	4.06898	0.994028	4.09343	4.25e-05	8.43e-05
HIST1H3F	8.15076	4.91639	0.554763	8.86214	7.85e-19	4.36e-18
HIST1H2BH	35.9446	4.19671	0.335601	12.505	7.01e-36	1.01e-34
HIST1H3G	30.8279	3.22427	0.304986	10.5719	4.02e-26	3.46e-25
HIST1H2BI	6.65288	4.4807	0.572946	7.82045	5.26e-15	2.28e-14
HIST1H4H	146.794	2.36392	0.205029	11.5297	9.35e-31	1.04e-29
ZNF322	482.385	1.1435	0.148723	7.68879	1.49e-14	6.22e-14
HIST1H2BJ	111.942	2.13231	0.224275	9.5076	1.95e-21	1.27e-20
HIST1H2AG	84.7534	2.78684	0.23196	12.0143	2.99e-33	3.79e-32
HIST1H4I	572.066	1.33081	0.13144	10.1248	4.29e-24	3.31e-23
HIST1H2BK	1312.96	1.31697	0.140944	9.34394	9.28e-21	5.81e-20
HIST1H2AH	5.14564	3.5681	0.489974	7.28221	3.28e-13	1.26e-12
POM121L2	4.87512	2.55046	0.384982	6.62489	3.48e-11	1.15e-10
HIST1H2BL	10.026	2.68347	0.303262	8.84868	8.86e-19	4.88e-18
HIST1H2AI	35.2399	4.21615	0.287426	14.6687	1.02e-48	2.78e-47
HIST1H3H	197.644	2.58443	0.202689	12.7508	3.09e-37	4.78e-36
HIST1H2AJ	6.40719	4.61176	0.463479	9.95033	2.51e-23	1.85e-22
HIST1H2BM	6.21069	4.71768	0.532363	8.86176	7.88e-19	4.37e-18
HIST1H4J	6.90429	2.07892	0.26463	7.85596	3.97e-15	1.74e-14
HIST1H4K	11.1376	2.39541	0.243636	9.83194	8.2e-23	5.85e-22
HIST1H2BN	132.724	1.86498	0.155162	12.0195	2.81e-33	3.56e-32
HIST1H2AL	5.1097	3.88587	0.413308	9.40188	5.36e-21	3.41e-20
HIST1H1B	24.5409	5.24057	0.459782	11.398	4.28e-30	4.59e-29
HIST1H3I	5.04101	4.11278	0.538154	7.64238	2.13e-14	8.84e-14
HIST1H4L	3.95961	4.17236	0.865864	4.81872	1.44e-06	3.27e-06
HIST1H3J	8.1519	4.61771	0.392026	11.7791	5e-32	5.95e-31
HIST1H2AM	17.5426	4.27735	0.320424	13.349	1.2e-40	2.21e-39
HIST1H2BO	13.625	3.82291	0.347444	11.003	3.7e-28	3.57e-27
OR2B6	9.31935	3.68605	0.347991	10.5924	3.23e-26	2.8e-25
NKAPL	19.3195	-1.70898	0.180196	-9.48398	2.45e-21	1.59e-20
MAS1L	2.68503	-1.83747	0.321298	-5.71889	1.07e-08	2.9e-08
UBD	606.025	1.76132	0.226057	7.79148	6.62e-15	2.85e-14
OR2H2	1.53834	1.67635	0.411565	4.0731	4.64e-05	9.18e-05
RNF39	413.396	1.21562	0.17462	6.96154	3.37e-12	1.2e-11
TRIM31	433.327	3.94102	0.274212	14.3722	7.74e-47	1.93e-45
TRIM40	4.96249	1.73069	0.468937	3.69067	0.000223662	0.000411986
TRIM10	17.8929	2.48023	0.35849	6.91854	4.56e-12	1.61e-11
TRIM15	75.522	6.36234	0.452476	14.0612	6.58e-45	1.51e-43
HLA-E	47523.4	-1.34165	0.0968953	-13.8464	1.34e-43	2.86e-42
ATAT1	679.034	1.29209	0.099038	13.0464	6.66e-39	1.12e-37
MUC21	4126.6	3.75459	0.309226	12.1419	6.33e-34	8.29e-33
MUC22	45.5526	1.4164	0.300327	4.71621	2.4e-06	5.33e-06
C6orf15	9.86077	4.8386	0.556209	8.69924	3.34e-18	1.78e-17
CDSN	4.49231	1.5908	0.326387	4.87397	1.09e-06	2.5e-06
PSORS1C2	12.3014	1.1343	0.304074	3.73036	0.000191206	0.000354674
CCHCR1	1350.02	1.18374	0.096662	12.2462	1.76e-34	2.37e-33
TCF19	1125.85	1.15847	0.111232	10.4149	2.12e-25	1.76e-24
POU5F1	177.169	1.26138	0.233631	5.39902	6.7e-08	1.7e-07
MCCD1	3.78154	3.12758	0.624765	5.00602	5.56e-07	1.3e-06
LST1	977.101	-1.34948	0.15296	-8.82239	1.12e-18	6.16e-18
LY6G6F	0.698693	-3.76391	0.381747	-9.85971	6.22e-23	4.47e-22
AL662899.2	0.376183	-1.69655	0.498853	-3.40091	0.000671624	0.00117566
LY6G6E	0.86134	-3.40685	0.344215	-9.89746	4.27e-23	3.1e-22
MPIG6B	25.8128	-2.17372	0.1513	-14.3669	8.35e-47	2.08e-45
MSH5	195.396	1.76754	0.153177	11.5392	8.37e-31	9.34e-30
SAPCD1	29.5975	1.80118	0.197735	9.10905	8.31e-20	4.89e-19
VARS	5932.11	1.1782	0.0868552	13.5651	6.45e-42	1.27e-40
ZBTB12	303.928	1.22651	0.118595	10.342	4.55e-25	3.71e-24
AL645922.1	1.92926	-2.32452	0.226316	-10.2711	9.51e-25	7.62e-24
CFB	1524.72	1.881	0.173616	10.8343	2.37e-27	2.18e-26
CYP21A2	25.4814	1.62653	0.2445	6.65247	2.88e-11	9.56e-11
TNXB	1804.18	-2.71486	0.204283	-13.2897	2.66e-40	4.77e-39
AGER	14435.8	-4.99903	0.265576	-18.8234	4.86e-79	4.52e-77
NOTCH4	1389.63	-1.80634	0.111377	-16.2184	3.74e-59	1.59e-57
C6orf10	3.72634	1.07969	0.384821	2.80569	0.00502095	0.00792801
HLA-DRA	79478.4	-1.03642	0.1492	-6.94649	3.74e-12	1.33e-11
HLA-DRB5	17073.8	-1.14213	0.190877	-5.98362	2.18e-09	6.26e-09
HLA-DOA	3625.71	-1.03757	0.16109	-6.44091	1.19e-10	3.77e-10
HLA-DPA1	28100	-1.00582	0.151386	-6.64407	3.05e-11	1.01e-10
COL11A2	102.501	1.46771	0.2251	6.52024	7.02e-11	2.26e-10
PFDN6	1720.14	1.05601	0.0939448	11.2408	2.57e-29	2.64e-28
KIFC1	1118.79	2.74467	0.156667	17.5191	1.02e-68	6.56e-67
UQCC2	1968.89	1.49267	0.112825	13.2299	5.89e-40	1.04e-38
GRM4	37.3968	2.67711	0.296556	9.02735	1.76e-19	1.02e-18
HMGA1	11868.5	2.27543	0.148953	15.2762	1.1e-52	3.6e-51
RPS10-NUDT3	2.51301	1.70808	0.353355	4.8339	1.34e-06	3.03e-06
PACSIN1	117.018	2.47717	0.205933	12.029	2.5e-33	3.19e-32
SPDEF	1839.67	3.27502	0.208152	15.7338	8.87e-56	3.3e-54
ANKS1A	2909.55	-1.07084	0.0753769	-14.2065	8.35e-46	1.99e-44
TCP11	42.9596	1.23943	0.324357	3.82117	0.000132819	0.000250288
SCUBE3	835.103	2.36845	0.225531	10.5017	8.49e-26	7.18e-25
TULP1	10.5964	1.5777	0.226719	6.95882	3.43e-12	1.22e-11
ARMC12	23.111	1.4754	0.173787	8.48972	2.07e-17	1.05e-16
CLPSL2	25.0113	5.5165	0.401878	13.7268	7.02e-43	1.45e-41
CLPSL1	15.4276	5.0218	0.460803	10.8979	1.18e-27	1.1e-26
CLPS	3.31204	3.52467	0.529041	6.66238	2.69e-11	8.97e-11
LHFPL5	15.7036	5.17461	0.345709	14.9681	1.19e-50	3.6e-49
SRPK1	4011.6	1.58286	0.0783089	20.2131	7.51e-91	1.37e-88
C6orf222	94.9459	5.50363	0.354564	15.5223	2.45e-54	8.73e-53
PXT1	5.70154	1.15289	0.227655	5.06421	4.1e-07	9.72e-07
RAB44	29.7076	-1.4486	0.178574	-8.112	4.98e-16	2.31e-15
CPNE5	433.666	1.23064	0.156828	7.84709	4.26e-15	1.86e-14
PPIL1	1728	1.03169	0.0938118	10.9975	3.93e-28	3.78e-27
PI16	109.398	-3.57593	0.26425	-13.5324	1.01e-41	1.95e-40
CCDC167	748.555	1.41368	0.114501	12.3464	5.09e-35	7.07e-34
MDGA1	366.749	-1.86802	0.151339	-12.3433	5.3e-35	7.33e-34
KCNK5	2867.55	1.46928	0.160731	9.14127	6.17e-20	3.66e-19
KIF6	104.461	-1.2873	0.208688	-6.16857	6.89e-10	2.06e-09
MOCS1	693.879	-1.36131	0.114295	-11.9105	1.04e-32	1.29e-31
LRFN2	10.4677	2.26975	0.377108	6.01884	1.76e-09	5.08e-09
UNC5CL	723.999	3.11846	0.168239	18.5359	1.06e-76	9.09e-75
TSPO2	10.2168	1.18056	0.215212	5.48558	4.12e-08	1.07e-07
NCR2	1.80287	1.6225	0.351153	4.6205	3.83e-06	8.34e-06
MDFI	1130.75	1.45111	0.174888	8.29734	1.06e-16	5.16e-16
BYSL	1187.9	1.22982	0.100903	12.1882	3.59e-34	4.77e-33
GUCA1A	13.021	4.52713	0.370552	12.2173	2.51e-34	3.37e-33
PTCRA	31.9457	-2.41532	0.179256	-13.4742	2.22e-41	4.22e-40
TTBK1	25.7703	1.67444	0.174668	9.58641	9.12e-22	6.08e-21
XPO5	2779.9	1.02833	0.078478	13.1035	3.15e-39	5.37e-38
RSPH9	151.829	-1.39507	0.165162	-8.44671	3e-17	1.5e-16
CAPN11	17.8383	-1.1774	0.152923	-7.69929	1.37e-14	5.74e-14
TMEM151B	8.01283	1.36476	0.257786	5.29414	1.2e-07	2.97e-07
TCTE1	67.275	-2.18732	0.301459	-7.25577	3.99e-13	1.53e-12
SPATS1	4.53119	-2.30297	0.451976	-5.09533	3.48e-07	8.3e-07
RUNX2	877.441	1.63075	0.127718	12.7684	2.46e-37	3.82e-36
CLIC5	3502.9	-3.61979	0.209888	-17.2463	1.19e-66	7e-65
ANKRD66	72.7954	-2.3328	0.331945	-7.02767	2.1e-12	7.59e-12
MEP1A	21.8199	1.09904	0.231595	4.74554	2.08e-06	4.63e-06
ADGRF5	12837	-1.09813	0.182183	-6.02762	1.66e-09	4.82e-09
ADGRF1	3706.7	2.4018	0.273675	8.77608	1.69e-18	9.2e-18
TNFRSF21	8941.62	1.9708	0.116105	16.9743	1.27e-64	6.83e-63
ADGRF2	23.2664	1.46275	0.313974	4.65881	3.18e-06	6.97e-06
ADGRF4	268.423	4.4727	0.272149	16.4347	1.08e-60	4.93e-59
GLYATL3	1.69463	2.68484	0.819592	3.27582	0.00105356	0.00180685
C6orf141	224.891	1.96013	0.212894	9.20709	3.35e-20	2.02e-19
PGK2	0.720244	1.39595	0.419364	3.32874	0.000872389	0.00150952
TFAP2D	57.9422	7.00514	0.586341	11.9472	6.71e-33	8.35e-32
TFAP2B	13.5793	1.0787	0.470148	2.29439	0.021768	0.0316632
PKHD1	148.497	1.81413	0.270635	6.70325	2.04e-11	6.85e-11
IL17A	2.93531	2.21321	0.46533	4.75622	1.97e-06	4.4e-06
GSTA5	2.81343	1.41061	0.354946	3.97416	7.06e-05	0.000137029
GSTA3	20.1044	-2.53289	0.325998	-7.76963	7.87e-15	3.37e-14
GCM1	15.5239	2.69877	0.282132	9.56563	1.12e-21	7.4e-21
GCLC	5122.35	2.26185	0.216162	10.4637	1.27e-25	1.06e-24
TINAG	50.4035	6.7408	0.572222	11.7801	4.95e-32	5.89e-31
FAM83B	106.095	3.24344	0.333713	9.71926	2.5e-22	1.72e-21
HMGCLL1	67.1831	-1.78093	0.189617	-9.39227	5.87e-21	3.72e-20
BEND6	118.798	1.74517	0.180686	9.65858	4.52e-22	3.07e-21
KHDRBS2	135.495	-1.72309	0.247308	-6.96738	3.23e-12	1.15e-11
LGSN	975.869	4.59434	0.286186	16.0537	5.38e-58	2.2e-56
EYS	168.597	2.09102	0.210943	9.91274	3.66e-23	2.67e-22
ADGRB3	65.4036	-1.57022	0.233211	-6.73305	1.66e-11	5.62e-11
COL9A1	14.5723	2.14181	0.276016	7.75974	8.51e-15	3.64e-14
RIMS1	111.879	1.03076	0.29114	3.54041	0.000399504	0.000715922
KCNQ5	225.082	2.6233	0.231775	11.3183	1.07e-29	1.11e-28
KHDC1L	12.2111	4.49845	0.489514	9.18963	3.94e-20	2.37e-19
KHDC1	129.998	1.10422	0.116256	9.49818	2.14e-21	1.39e-20
FILIP1	874.537	-1.57176	0.17738	-8.86097	7.93e-19	4.4e-18
MEI4	6.99131	1.02439	0.373923	2.73959	0.00615168	0.00961634
ELOVL4	102.005	1.98543	0.232014	8.55738	1.15e-17	5.93e-17
TTK	464.054	3.29213	0.17015	19.3484	2.1e-83	2.43e-81
TPBG	1909.21	1.72375	0.119626	14.4094	4.51e-47	1.14e-45
PRSS35	44.6641	-2.2108	0.204172	-10.8282	2.53e-27	2.33e-26
RIPPLY2	5.30684	2.0554	0.607805	3.38168	0.000720447	0.00125718
TBX18	137.458	2.67962	0.338141	7.92456	2.29e-15	1.02e-14
NT5E	3449.37	1.91927	0.199421	9.62424	6.32e-22	4.25e-21
HTR1E	1.37242	1.60217	0.729274	2.19694	0.0280247	0.0402047
CGA	135.268	6.82752	0.615646	11.09	1.4e-28	1.38e-27
CFAP206	15.4372	-1.63073	0.23203	-7.02809	2.09e-12	7.57e-12
CNR1	320.281	-1.51215	0.209097	-7.2318	4.77e-13	1.81e-12
SRSF12	101.05	2.12906	0.187559	11.3514	7.3e-30	7.72e-29
GABRR1	16.6871	2.98313	0.441973	6.74958	1.48e-11	5.04e-11
GABRR2	19.1914	1.12588	0.174055	6.46853	9.9e-11	3.16e-10
EPHA7	90.8776	1.08438	0.30848	3.51525	0.000439342	0.000784081
FUT9	117.306	6.70317	0.455015	14.7318	4.03e-49	1.12e-47
FHL5	170.245	-2.74194	0.172057	-15.9363	3.55e-57	1.4e-55
KLHL32	71.3783	-1.29671	0.180551	-7.18195	6.87e-13	2.58e-12
POU3F2	97.8448	5.85383	0.430013	13.6131	3.35e-42	6.67e-41
FAXC	529.389	1.31015	0.153616	8.52876	1.48e-17	7.55e-17
PRDM13	7.57035	4.86602	0.556337	8.74653	2.2e-18	1.19e-17
MCHR2	1.56845	2.34083	0.610624	3.83351	0.000126329	0.000238588
SIM1	9.61171	3.73708	0.506898	7.37246	1.68e-13	6.56e-13
GRIK2	101.676	2.62763	0.259593	10.1221	4.41e-24	3.4e-23
LIN28B	20.8956	7.99202	0.80785	9.89295	4.47e-23	3.24e-22
POPDC3	103.743	1.3149	0.336483	3.90777	9.32e-05	0.000178428
CD24	13054.2	1.44392	0.166596	8.66716	4.43e-18	2.34e-17
SOBP	252.979	-1.40097	0.16241	-8.6261	6.35e-18	3.33e-17
NR2E1	14.9651	4.66325	0.426309	10.9387	7.53e-28	7.15e-27
SESN1	1109.7	-1.63725	0.100635	-16.2692	1.63e-59	7.01e-58
PPIL6	306.026	-1.31648	0.175037	-7.52115	5.43e-14	2.19e-13
WASF1	392.381	1.27465	0.133328	9.56022	1.18e-21	7.78e-21
DDO	151.935	-1.31447	0.16153	-8.13763	4.03e-16	1.89e-15
WISP3	44.4298	1.66784	0.260418	6.40446	1.51e-10	4.74e-10
RFPL4B	1.55907	2.18668	0.592197	3.6925	0.000222063	0.000409311
HS3ST5	93.614	1.14171	0.324468	3.51872	0.000433637	0.000774392
COL10A1	2725.3	4.60605	0.21138	21.7903	2.87e-105	1.27e-102
TRAPPC3L	5.42824	-2.06229	0.166183	-12.4097	2.31e-35	3.25e-34
RSPH4A	266.251	-1.78083	0.257773	-6.90851	4.9e-12	1.73e-11
FAM162B	145.922	-2.27902	0.152292	-14.9648	1.25e-50	3.76e-49
GPRC6A	2.64451	2.57691	0.576294	4.47152	7.77e-06	1.65e-05
RFX6	13.2244	3.52478	0.565884	6.2288	4.7e-10	1.43e-09
VGLL2	3.61719	2.67557	0.684928	3.90635	9.37e-05	0.000179445
FAM184A	650.078	-1.25994	0.175862	-7.16438	7.81e-13	2.92e-12
GJA1	6039.93	-1.23749	0.162709	-7.60553	2.84e-14	1.17e-13
SERINC1	9773.49	-1.17598	0.0644686	-18.2411	2.44e-74	1.89e-72
PKIB	692.67	1.99391	0.207624	9.60348	7.73e-22	5.18e-21
FABP7	17.6688	2.54083	0.367398	6.91575	4.65e-12	1.64e-11
NKAIN2	42.6266	2.01912	0.354254	5.69963	1.2e-08	3.24e-08
HEY2	117.32	-1.09849	0.14269	-7.6984	1.38e-14	5.78e-14
CENPW	324.743	1.47384	0.153096	9.62692	6.15e-22	4.15e-21
SOGA3	29.8014	-2.50312	0.197324	-12.6854	7.13e-37	1.09e-35
KIAA0408	24.0983	-2.36516	0.249177	-9.49187	2.27e-21	1.47e-20
ARHGAP18	2768.6	-1.16226	0.0952974	-12.1961	3.26e-34	4.34e-33
TMEM244	1.58123	1.53976	0.339935	4.52957	5.91e-06	1.27e-05
EPB41L2	2404.65	-1.41264	0.112613	-12.5442	4.28e-36	6.26e-35
AKAP7	283.868	-1.09036	0.106679	-10.2209	1.6e-24	1.27e-23
ARG1	14.6816	-1.17161	0.20189	-5.80321	6.51e-09	1.79e-08
ENPP3	456.41	2.16393	0.26684	8.10947	5.08e-16	2.36e-15
CTAGE9	4.15975	1.24825	0.285306	4.37514	1.21e-05	2.53e-05
CTGF	10699.8	-1.60111	0.147366	-10.8648	1.7e-27	1.58e-26
EYA4	184.632	-1.35202	0.25951	-5.20988	1.89e-07	4.61e-07
TCF21	529.066	-3.08425	0.194003	-15.898	6.55e-57	2.55e-55
SGK1	5841.1	-1.19908	0.129882	-9.23205	2.66e-20	1.61e-19
MTFR2	175.667	1.48642	0.148771	9.99134	1.66e-23	1.24e-22
SLC35D3	7.70699	1.14324	0.355765	3.21346	0.00131145	0.00222262
IL20RA	522.987	-1.71756	0.190902	-8.9971	2.32e-19	1.33e-18
IL22RA2	66.8834	3.72537	0.267468	13.9283	4.27e-44	9.36e-43
OLIG3	2.77899	3.36578	1.03255	3.25969	0.00111534	0.00190712
TNFAIP3	3238.14	-1.14102	0.132103	-8.63732	5.75e-18	3.03e-17
PERP	12258.4	1.00243	0.122355	8.19277	2.55e-16	1.21e-15
NHSL1	1423.79	-1.72801	0.129609	-13.3325	1.5e-40	2.74e-39
ECT2L	123.434	-1.61673	0.266721	-6.06152	1.35e-09	3.93e-09
NMBR	2.41973	-1.3638	0.228312	-5.97342	2.32e-09	6.65e-09
PHACTR2	2142.39	-1.47483	0.114388	-12.8932	4.92e-38	7.9e-37
AL049844.1	0.776208	-1.70476	0.236732	-7.20121	5.97e-13	2.25e-12
PLAGL1	885.166	-1.16607	0.140338	-8.30899	9.65e-17	4.69e-16
STX11	549.198	-2.99795	0.128214	-23.3823	6.46e-121	8.43e-118
UTRN	6261.33	-1.37228	0.11428	-12.0081	3.22e-33	4.07e-32
EPM2A	211.072	-1.22414	0.0797593	-15.3479	3.66e-53	1.23e-51
ADGB	56.4057	-2.02429	0.337092	-6.00516	1.91e-09	5.51e-09
SAMD5	397.458	-1.15762	0.187071	-6.18815	6.09e-10	1.83e-09
SASH1	1978.2	-1.85212	0.101401	-18.2653	1.56e-74	1.22e-72
UST	523.45	-1.0705	0.160779	-6.65822	2.77e-11	9.22e-11
SUMO4	9.60856	1.85253	0.256176	7.23146	4.78e-13	1.81e-12
RAET1L	8.65122	3.87453	0.455407	8.50785	1.77e-17	9e-17
IYD	617.73	1.3727	0.272787	5.03213	4.85e-07	1.14e-06
AKAP12	3462.31	-1.03577	0.23619	-4.38532	1.16e-05	2.42e-05
CCDC170	467.409	-1.62958	0.207739	-7.84439	4.35e-15	1.9e-14
SYNE1	5515.23	-1.13569	0.147709	-7.68871	1.49e-14	6.22e-14
MYCT1	513.521	-2.24384	0.115531	-19.4219	5.04e-84	6e-82
VIP	9.87063	-1.52653	0.19052	-8.01244	1.12e-15	5.11e-15
RGS17	529.435	3.72695	0.19836	18.7889	9.31e-79	8.55e-77
OPRM1	1.26338	2.08908	0.504383	4.14185	3.45e-05	6.89e-05
IPCEF1	572.182	1.19767	0.199216	6.01192	1.83e-09	5.3e-09
SYNJ2	1327.53	1.52057	0.0994348	15.2921	8.63e-53	2.86e-51
FNDC1	1853.11	2.3866	0.219508	10.8725	1.56e-27	1.45e-26
LPA	3.91581	-1.87366	0.321818	-5.82212	5.81e-09	1.61e-08
AGPAT4	470.903	-1.12354	0.120855	-9.29665	1.45e-20	8.93e-20
PACRG	86.3124	-2.05071	0.253225	-8.09837	5.57e-16	2.58e-15
QKI	5559.79	-1.3357	0.0909959	-14.6787	8.83e-49	2.41e-47
C6orf118	85.2715	-1.97858	0.347541	-5.69308	1.25e-08	3.36e-08
T	35.5994	5.47365	0.481901	11.3584	6.73e-30	7.15e-29
TCP10L2	2.25571	1.15709	0.392746	2.94617	0.0032174	0.00521284
UNC93A	17.6986	5.76092	0.498825	11.549	7.47e-31	8.36e-30
TTLL2	15.8586	1.29526	0.248094	5.22085	1.78e-07	4.36e-07
KIF25	42.2879	1.19133	0.206674	5.7643	8.2e-09	2.24e-08
THBS2	9439.49	2.89916	0.181466	15.9764	1.87e-57	7.46e-56
TCTE3	89.978	1.06282	0.126648	8.39193	4.78e-17	2.36e-16
GET4	260.839	1.04158	0.0916581	11.3638	6.34e-30	6.75e-29
[truncated: 3,439 more rows]
